# Supplementary material
Source: MDPI journal article supplement (https://www.mdpi.com/2227-9717/9/10/1830)
Supplement: s1 [file s1]

# Reproduction of Simulation

Reproduction of the analysis (Simulation) : Figure 2, T

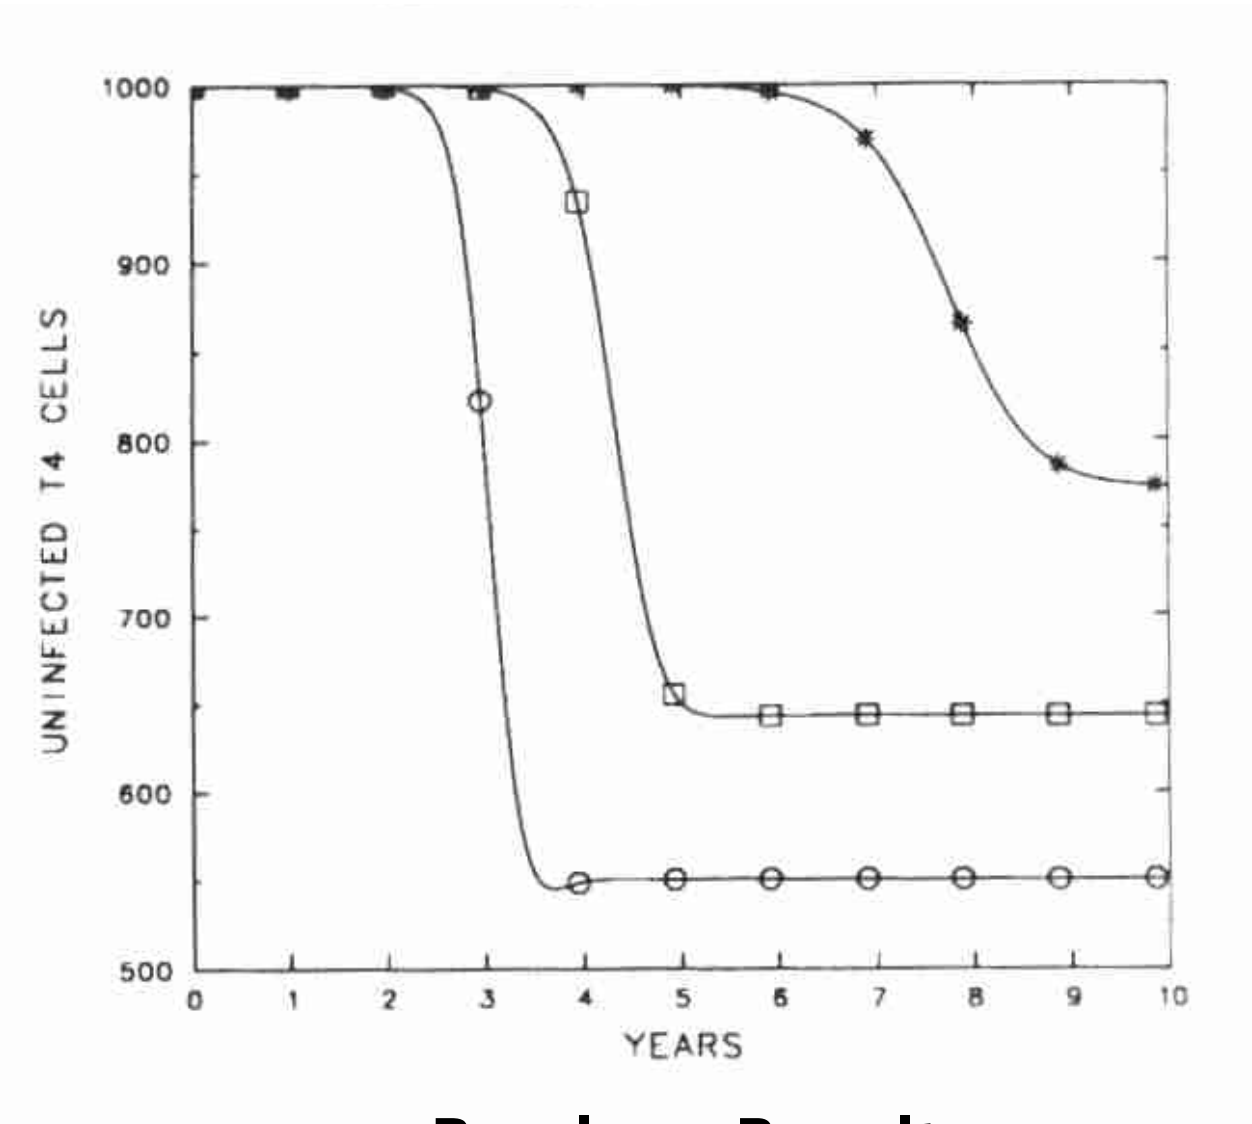

Perelson Result

$N = 1000$  (\*),  $N = 1200$  (□), and  $N = 1400$  (○).

$N = 1000$

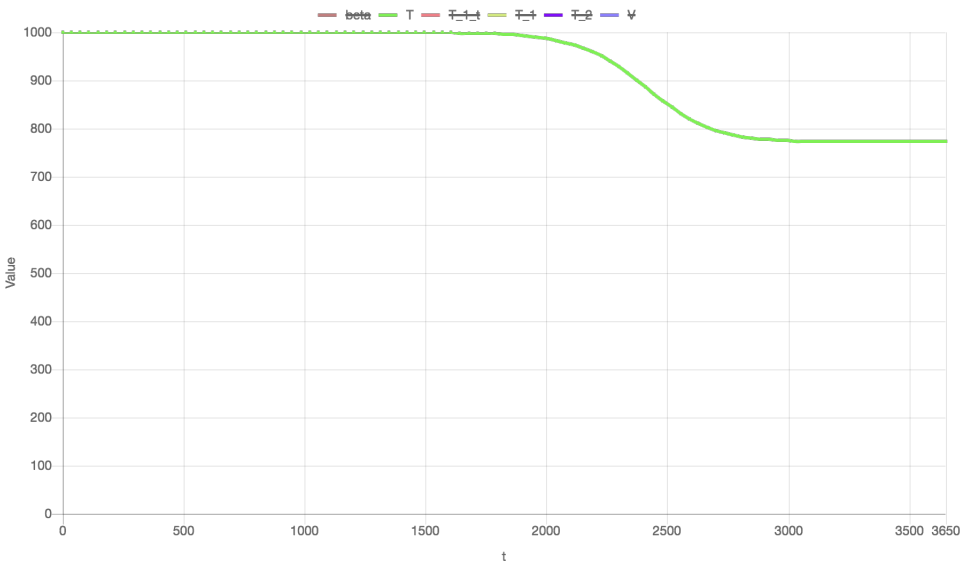

$N = 1200$

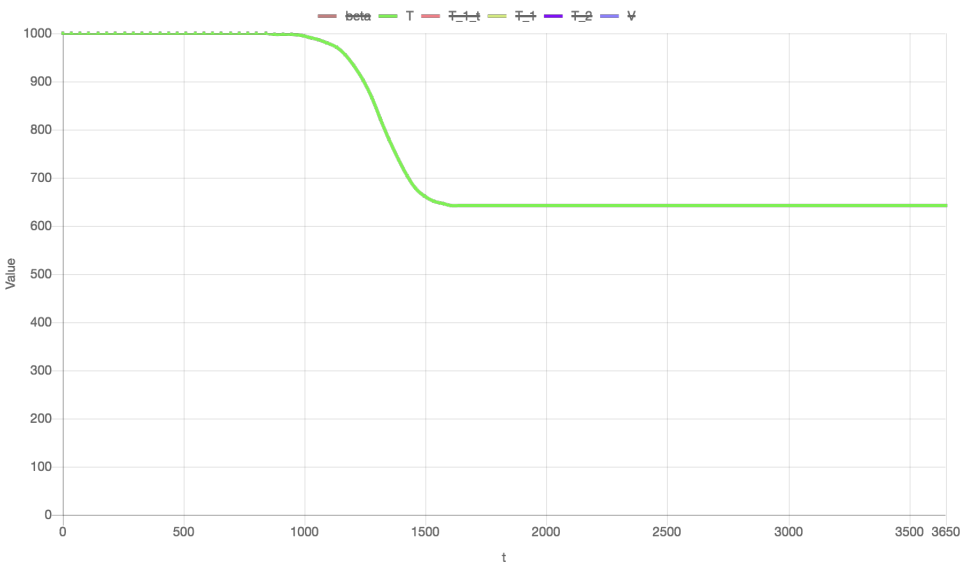

$N = 1400$

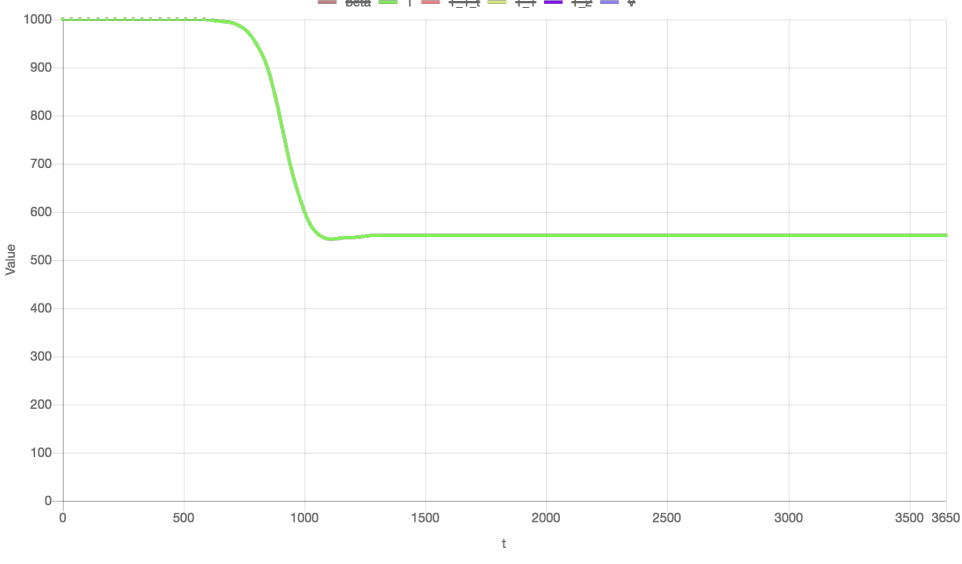

SBMLWebApp Results

# Reproduction of the analysis (Simulation) : Figure 2, Tstar

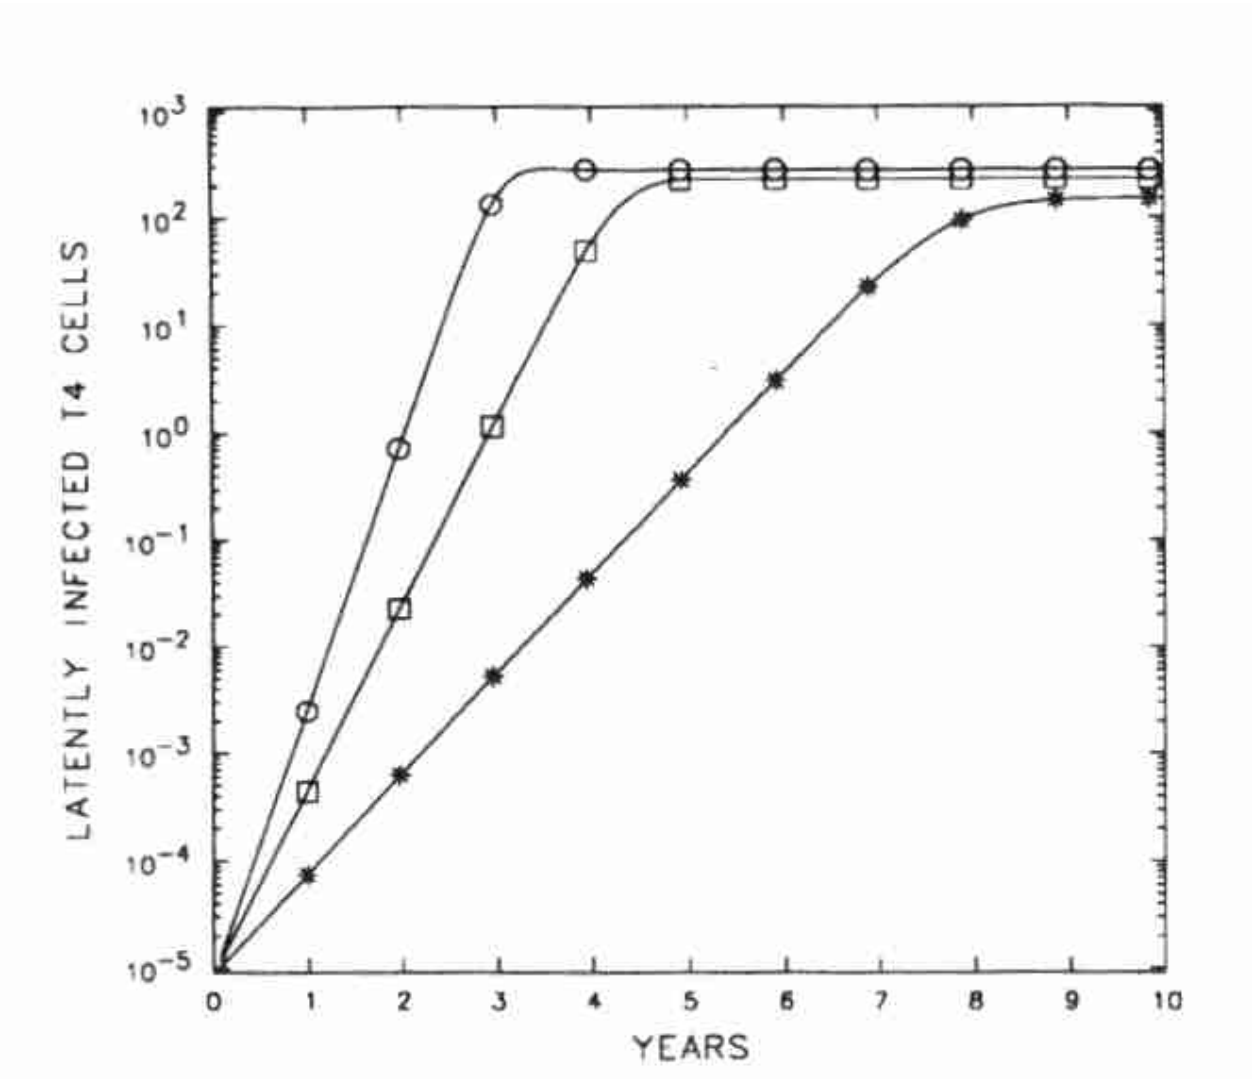

## Perelson Result

$N = 1000$  (\*),  $N = 1200$  (□), and  $N = 1400$  (○).

$N = 1000$

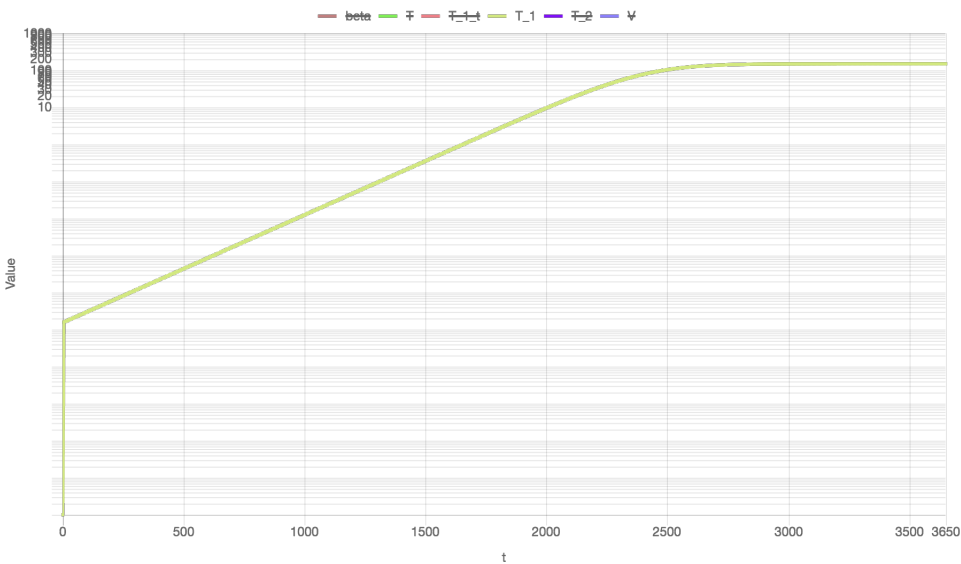

$N = 1200$

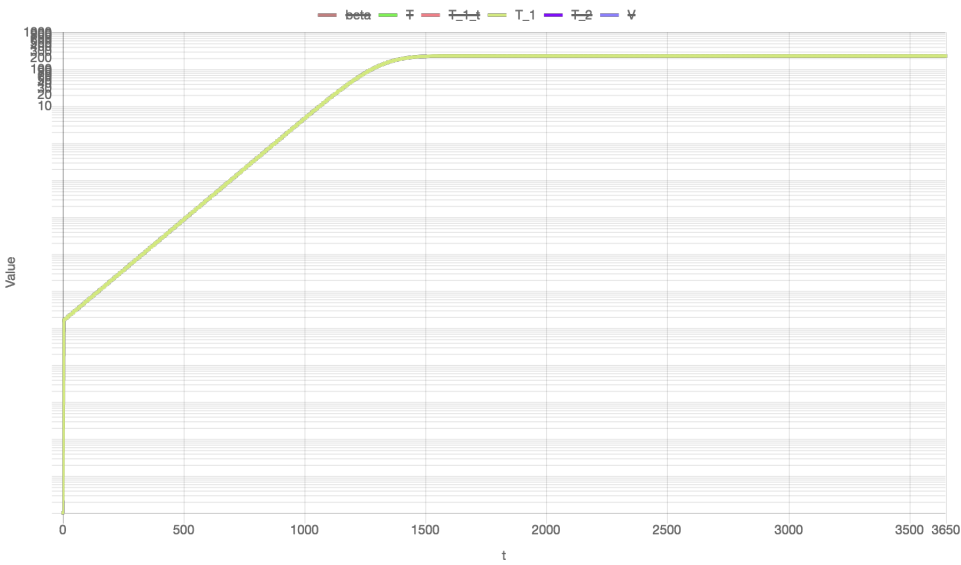

$N = 1400$

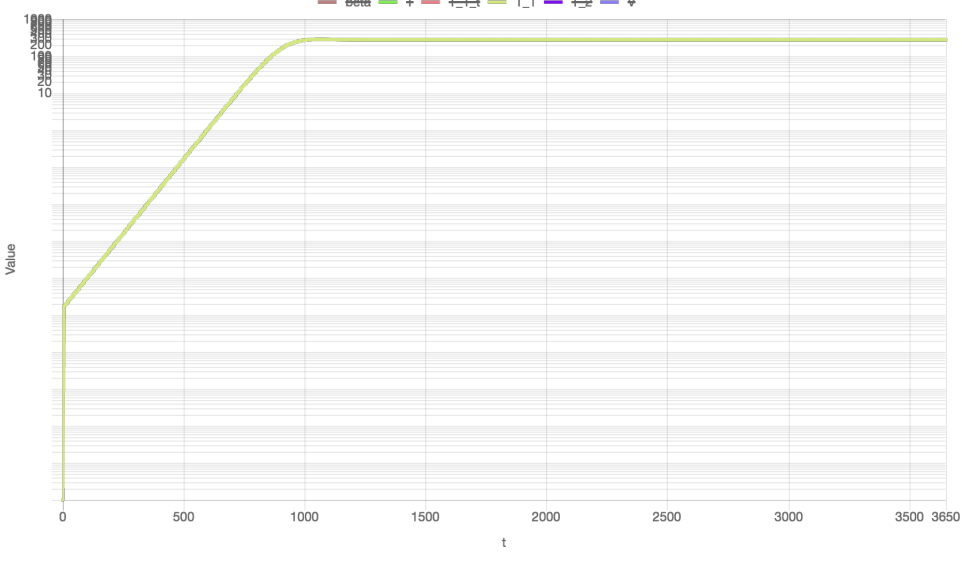

## SBMLWebApp Results

Reproduction of the analysis (Simulation) : Figure 2, Tstarstar

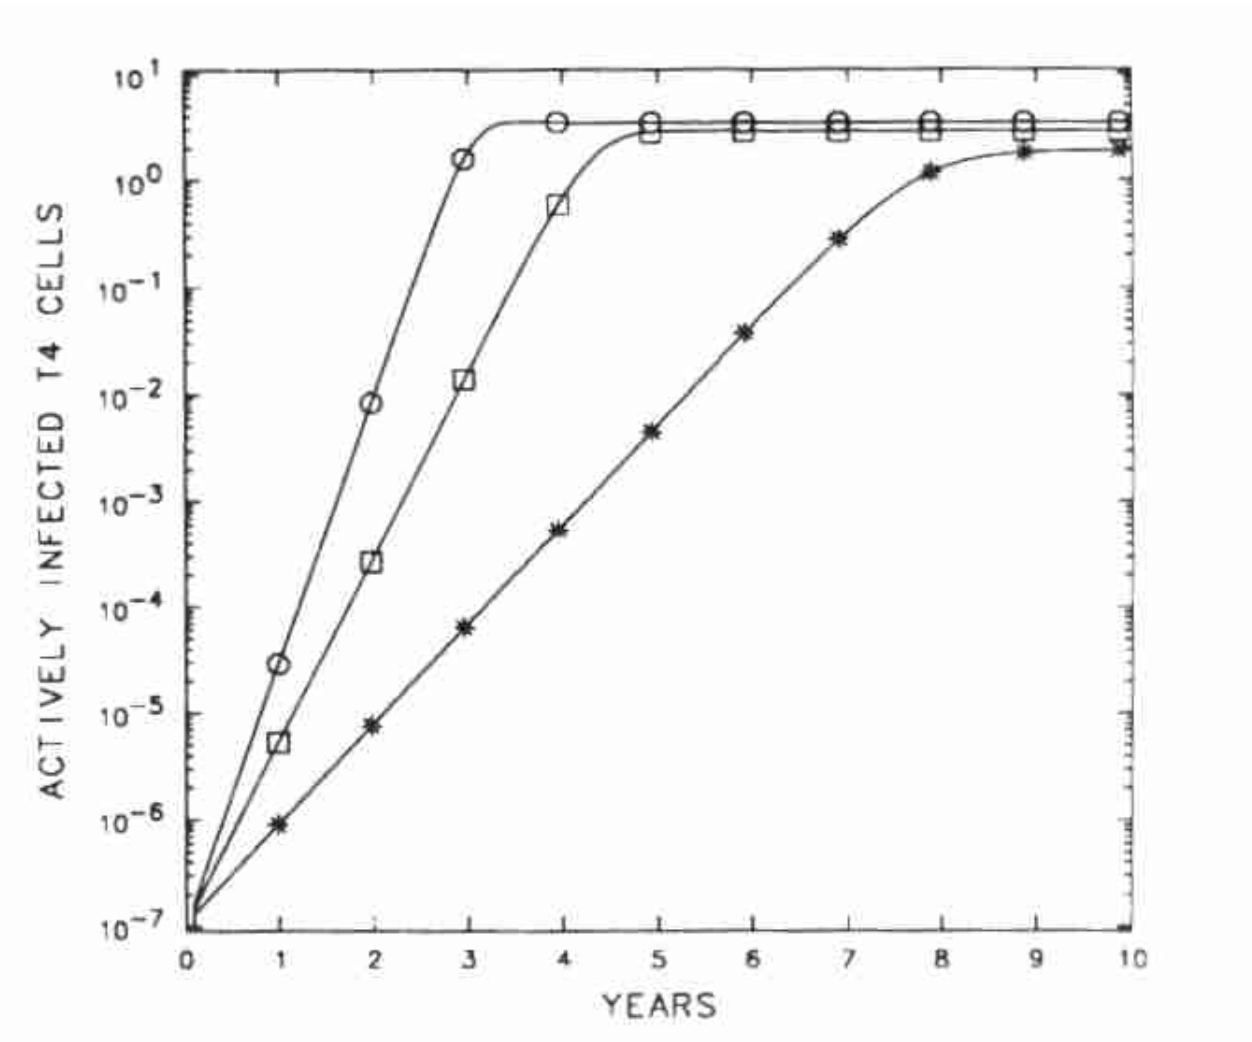

Perelson Result

$N = 1000$  (\*),  $N = 1200$  ( $\square$ ), and  $N = 1400$  ( $\circ$ ).

$N = 1000$

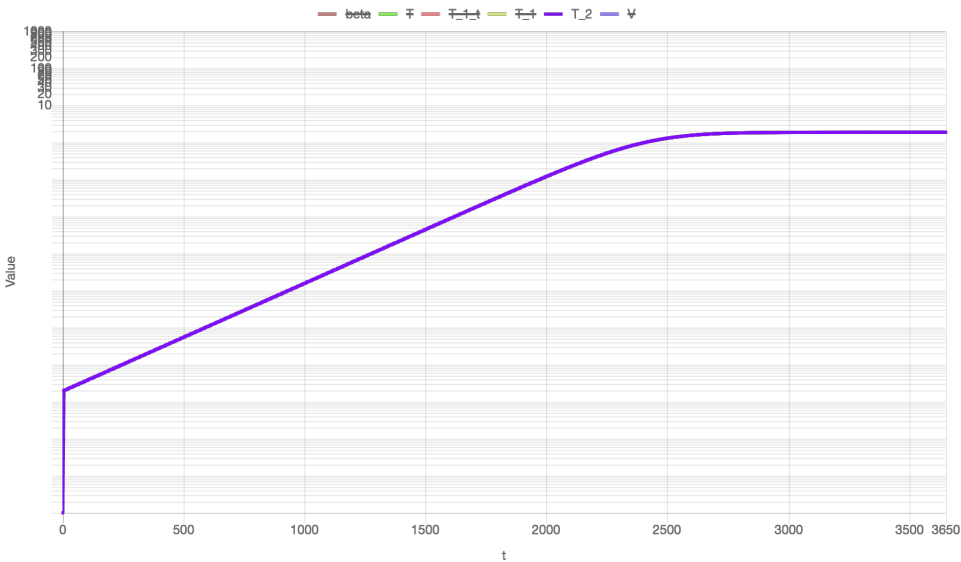

$N = 1200$

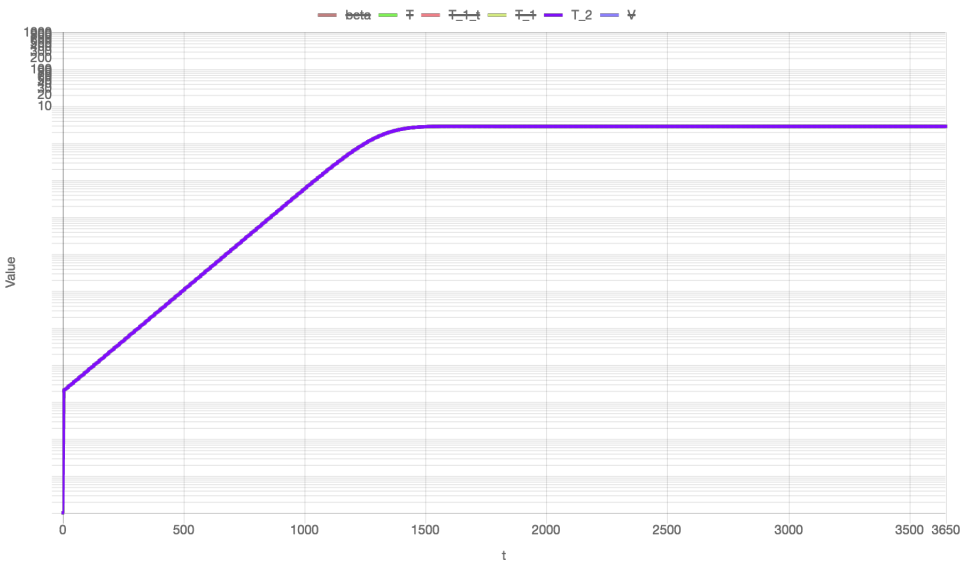

$N = 1400$

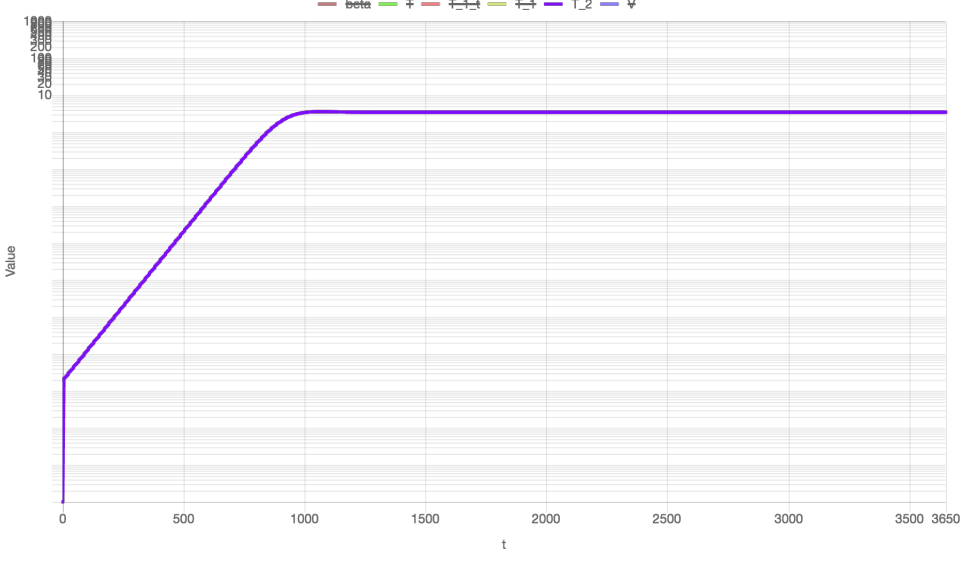

SBMLWebApp Results



Reproduction of the analysis (Simulation) : Figure 2, V

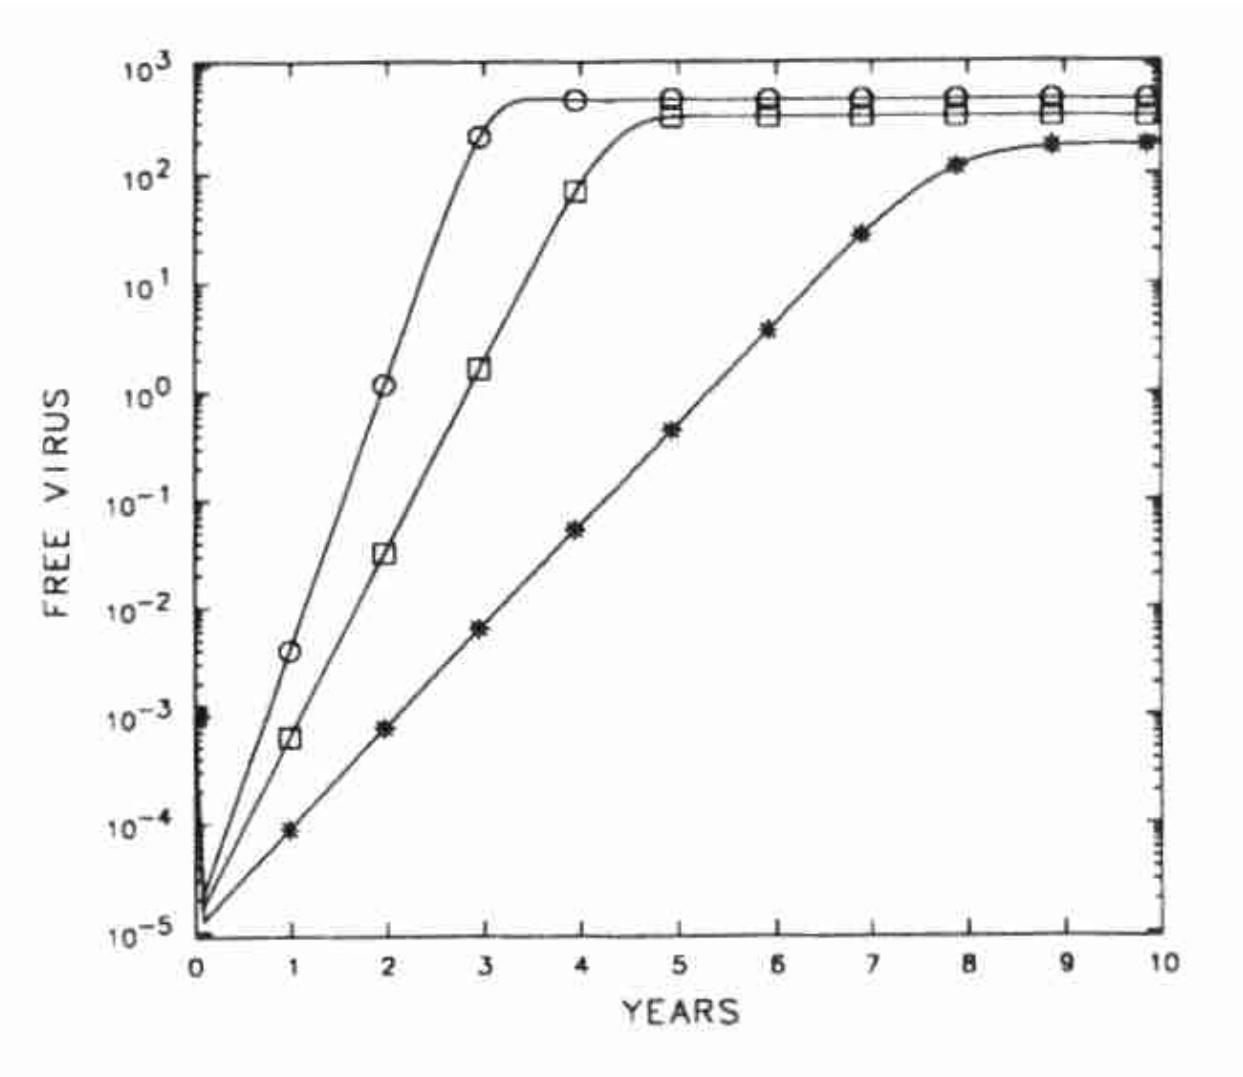

Perelson Result

$N = 1000$  (\*),  $N = 1200$  ( $\square$ ), and  $N = 1400$  ( $\circ$ ).

$N = 1000$

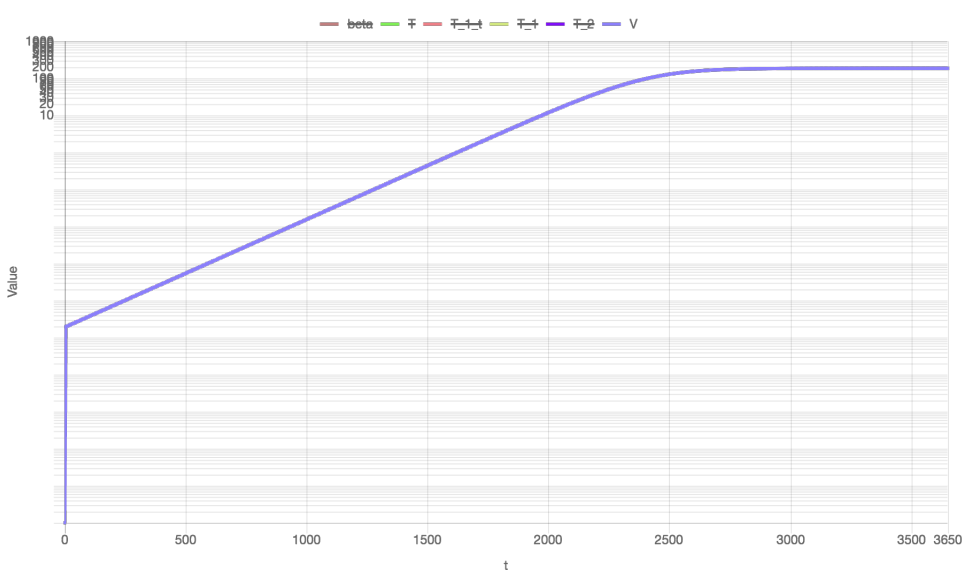

$N = 1200$

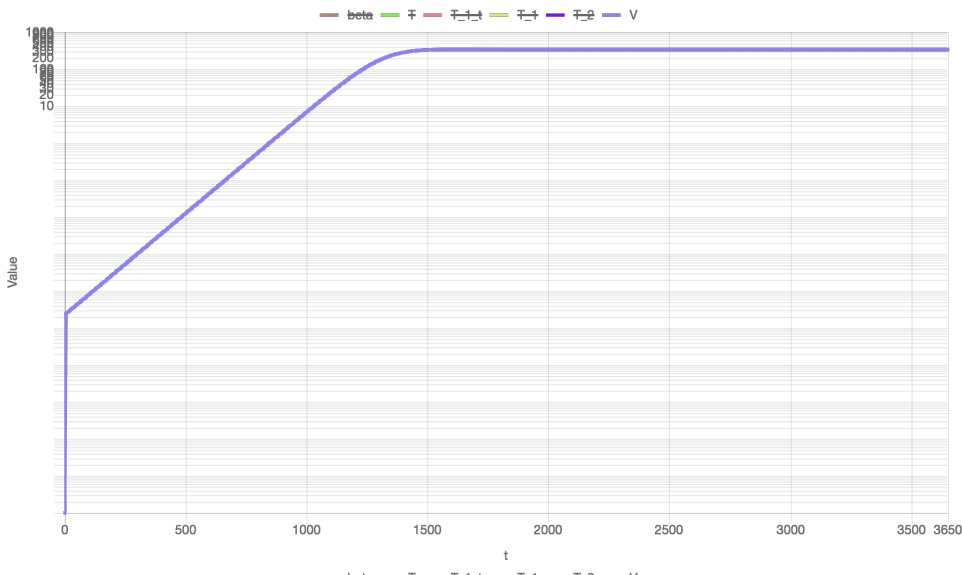

$N = 1400$

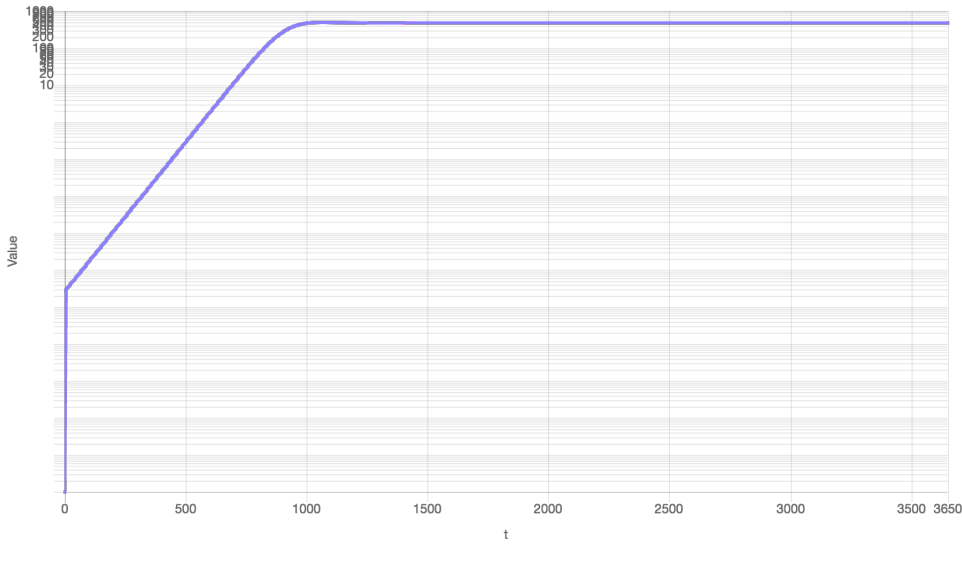

SBMLWebApp Results

Reproduction of the analysis (Simulation) : Figure 4

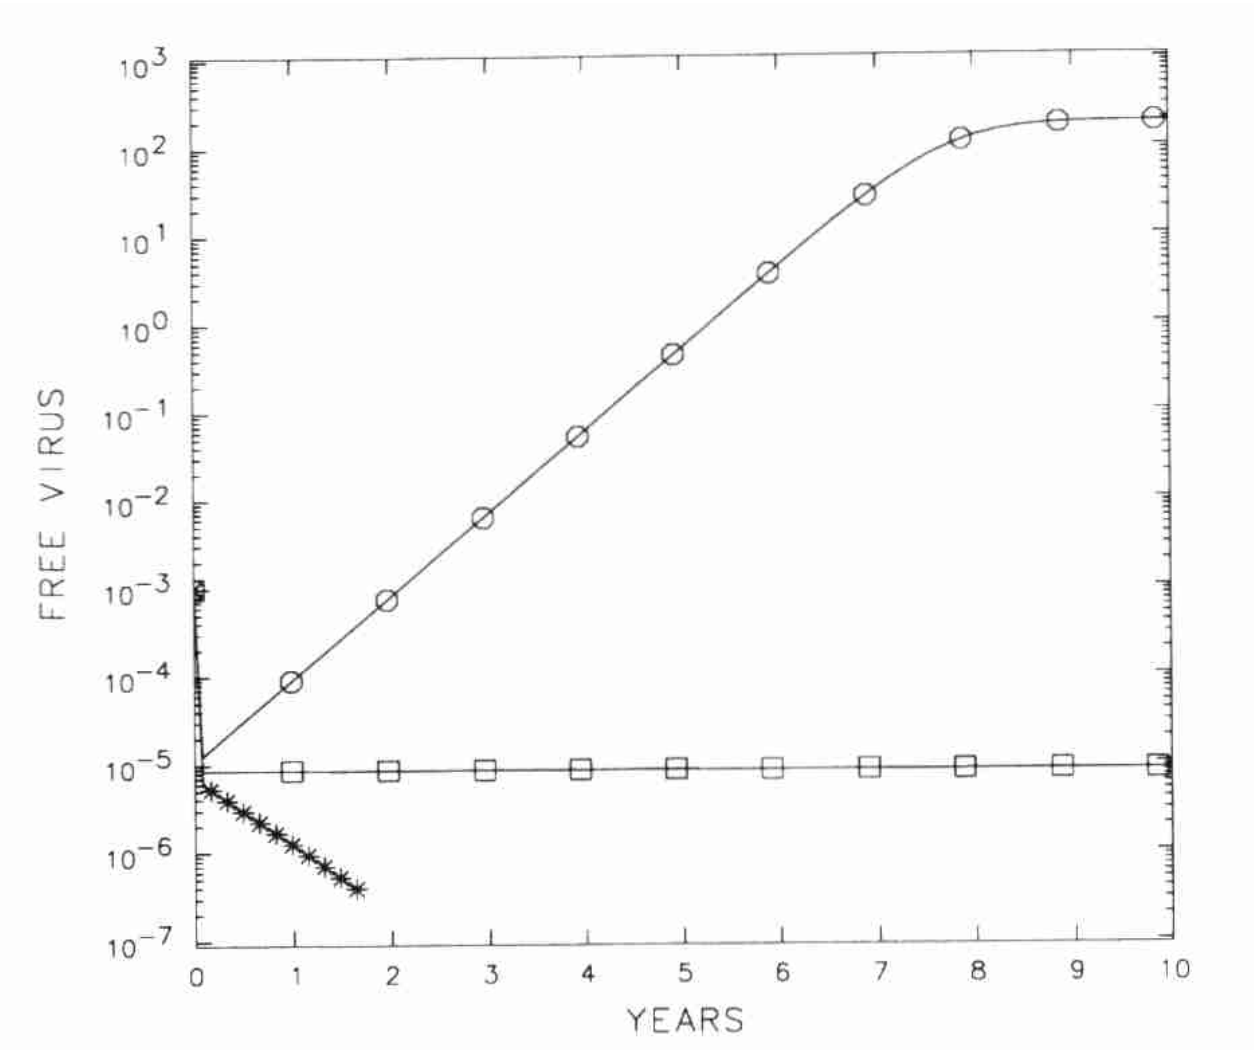

Perelson Result

$N = 600$

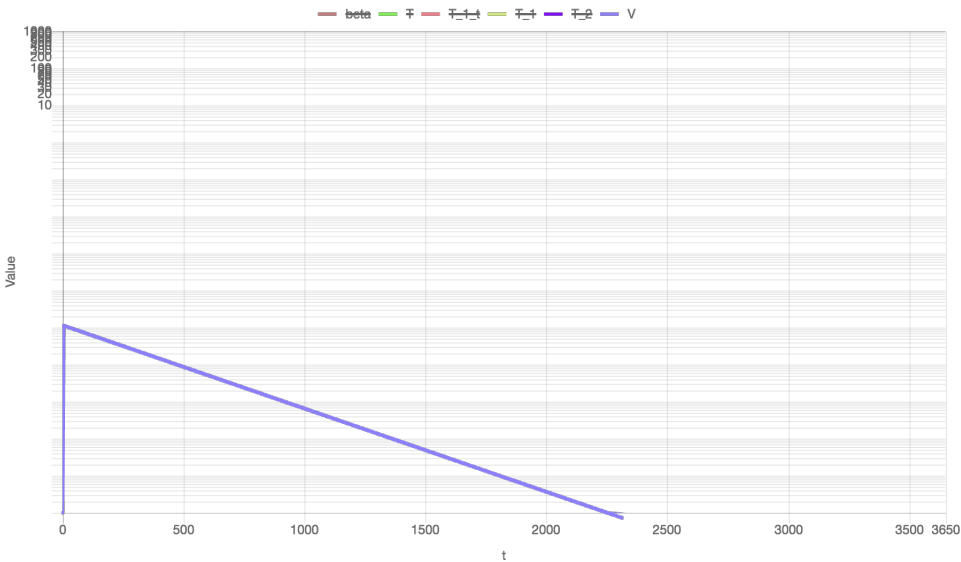

$N = 1000$

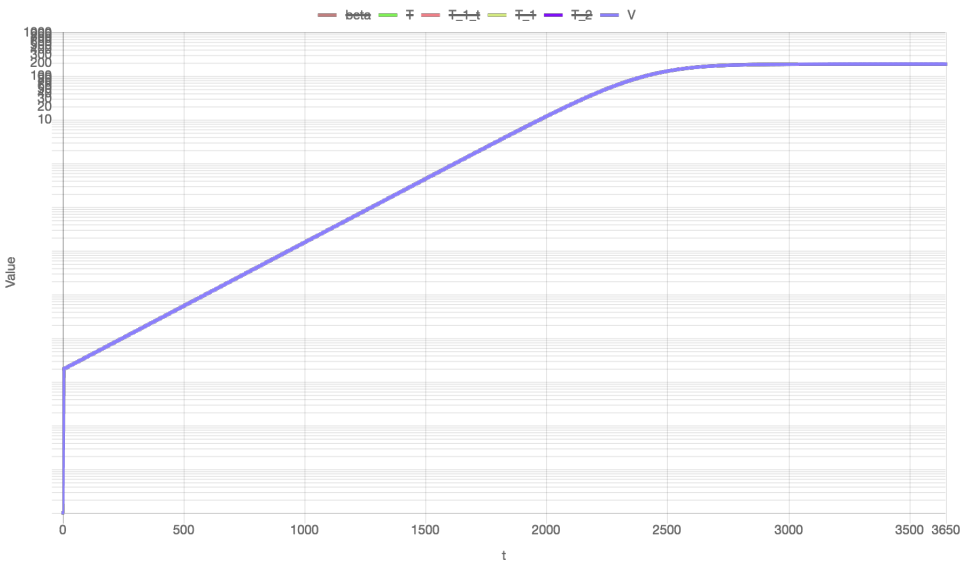

$N = 774$

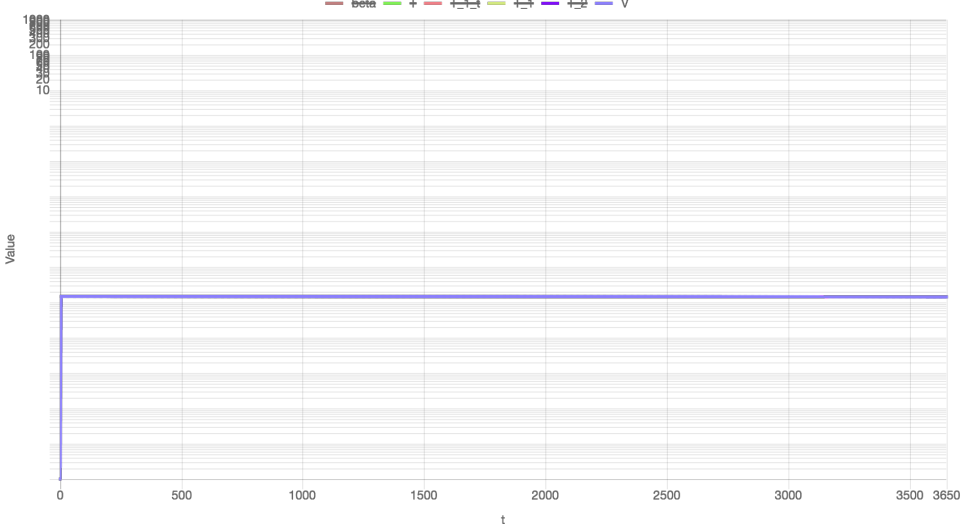

SBMLWebApp Results

$N = 600 (*)$ ,  $N = 1000 (O)$ ,  $N = N_{crit} (\square) = 774$

Reproduction of the analysis (Simulation) : Figure 7, T

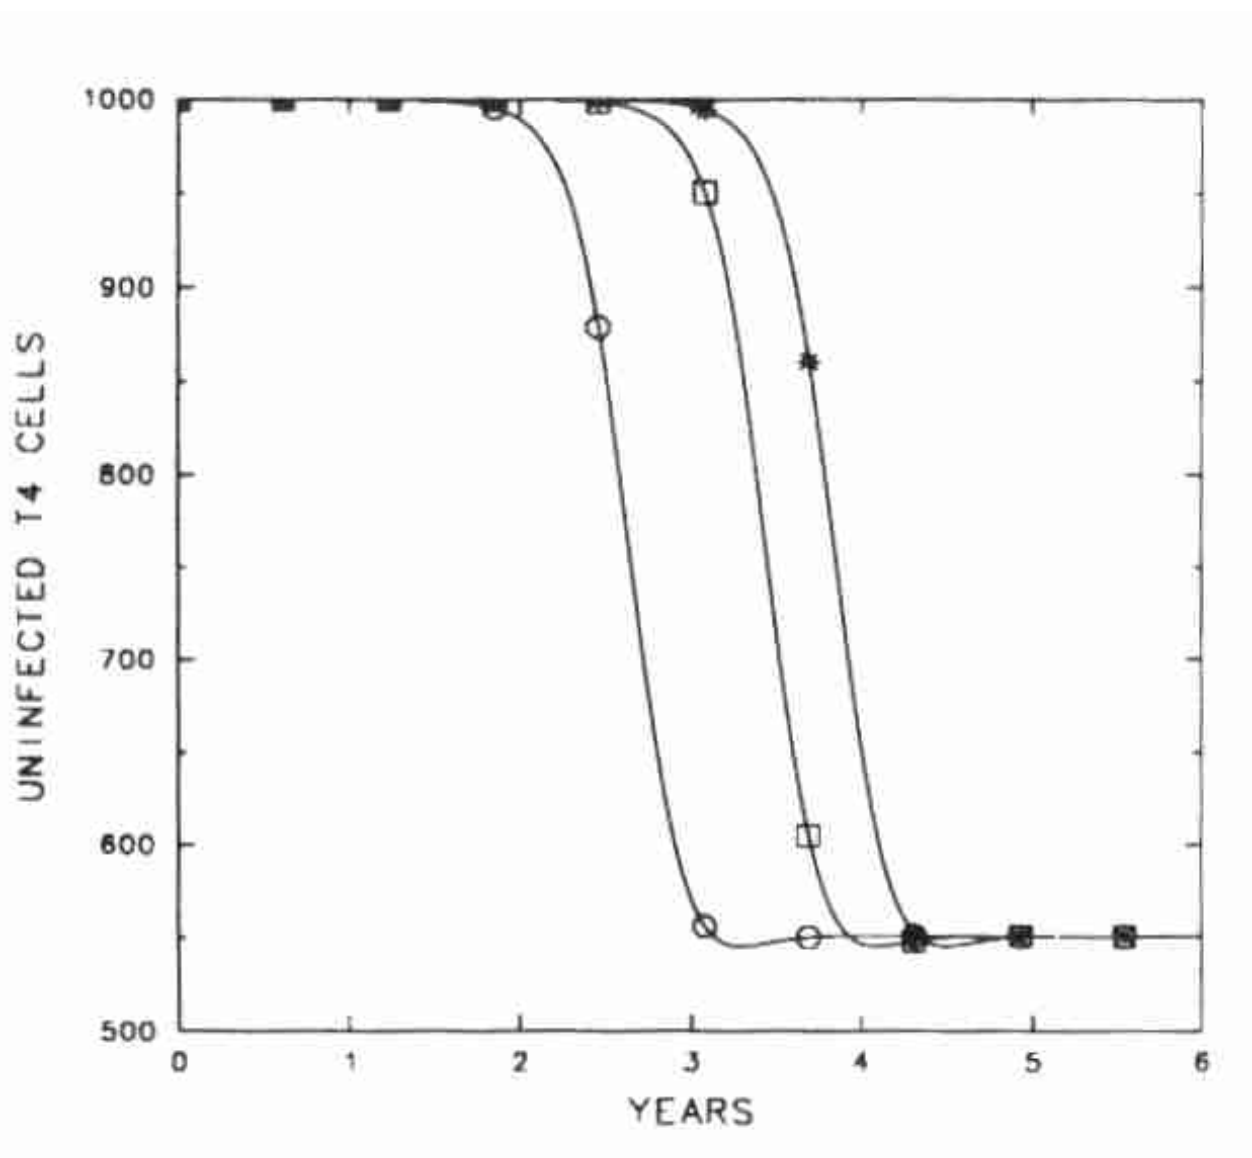

Perelson Result

$N = 1400$ ,  $V_0 = 10^{-6}$  (\*),  $10^{-4}$  ( $\square$ ), and  $10^{-2}$  ( $\circ$ )  $\text{mm}^{-3}$ .

$V_0 = 10^{-6}$

$V_0 = 10^{-4}$

$V_0 = 10^{-2}$

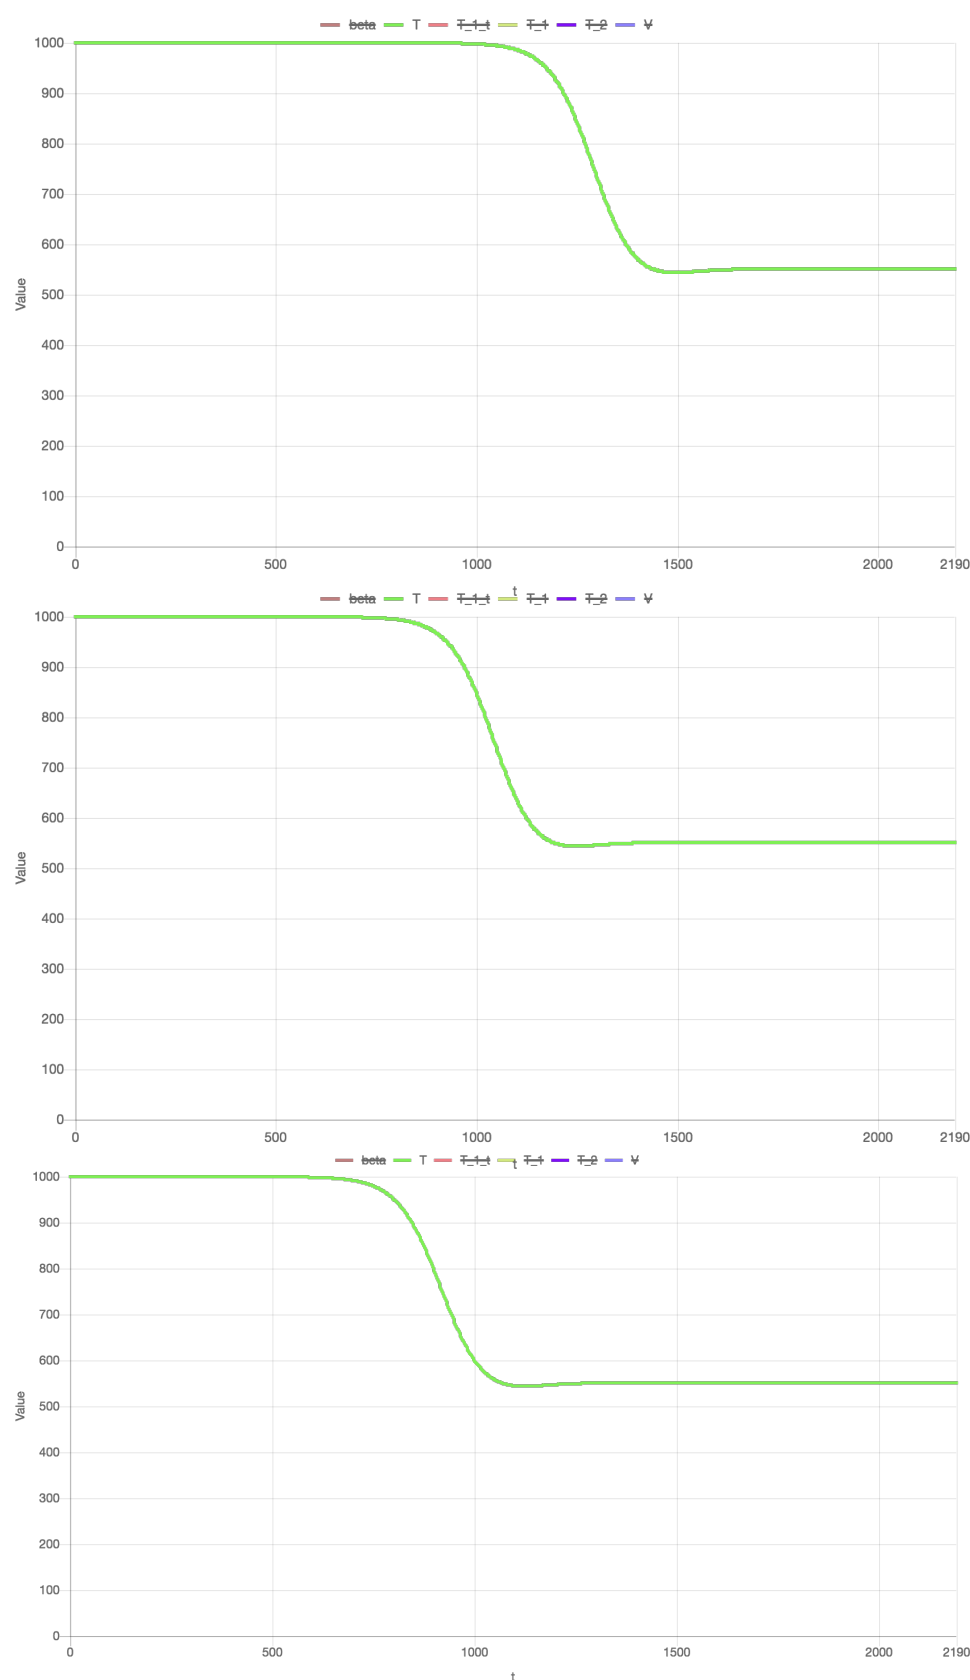

SBMLWebApp Results

Reproduction of the analysis (Simulation) : Figure 7, Tstar

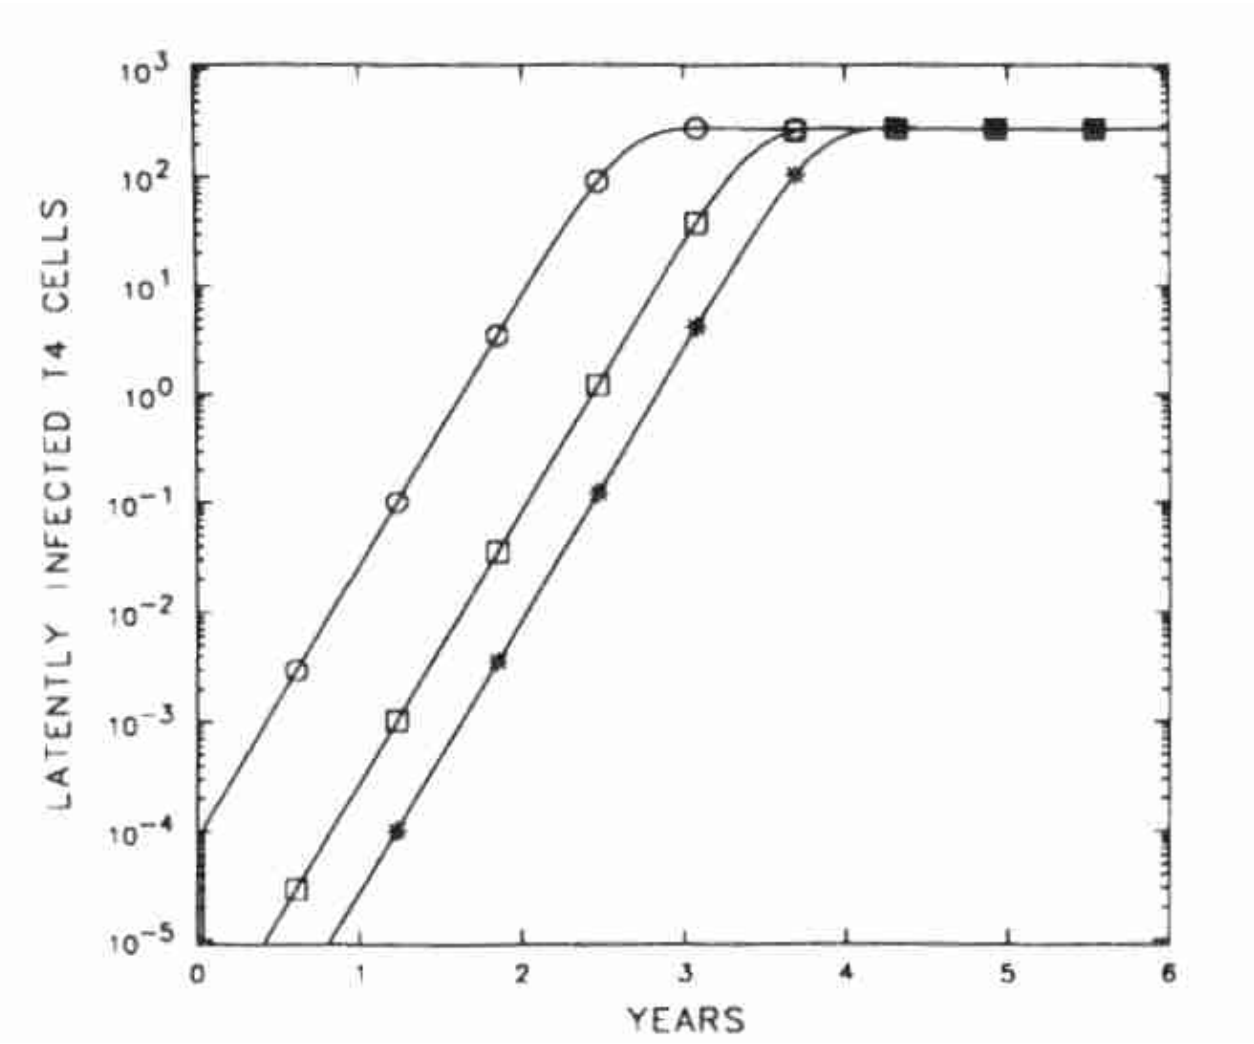

Perelson Result

$N = 1400$ ,  $V_0 = 10^{-6}$  (\*),  $10^{-4}$  (□), and  $10^{-2}$  (○)  $\text{mm}^{-3}$ .

$V_0 = 10^{-6}$

$V_0 = 10^{-4}$

$V_0 = 10^{-2}$

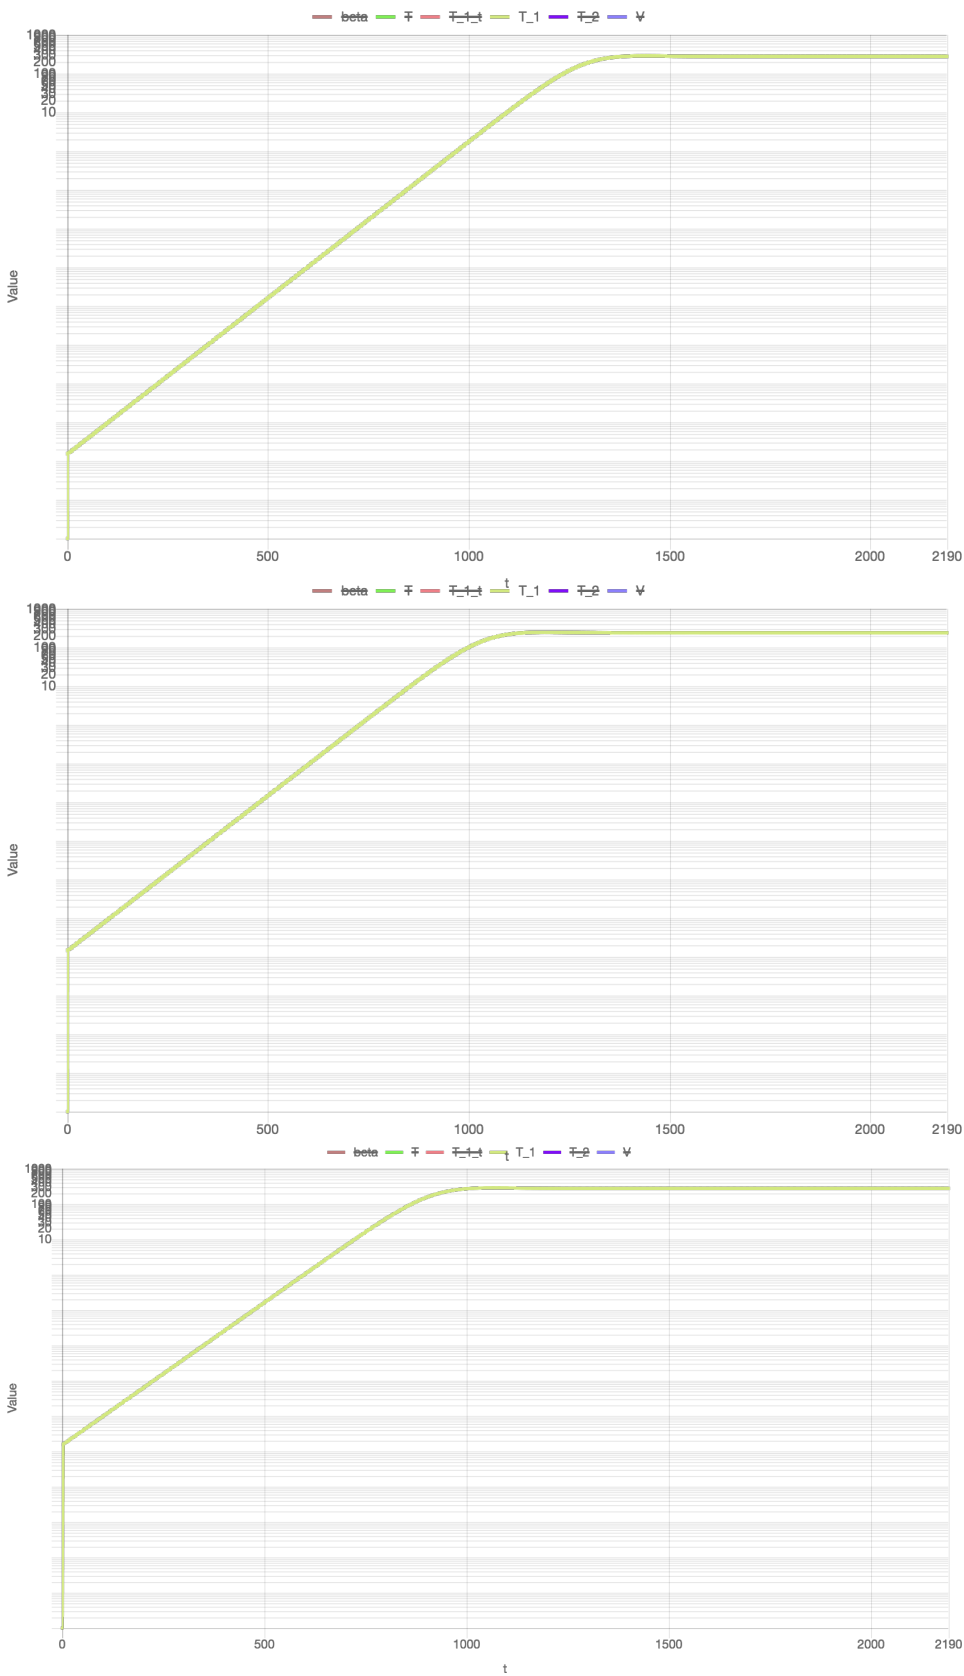

SBMLWebApp Results

Reproduction of the analysis (Simulation) : Figure 7, Tstarstar

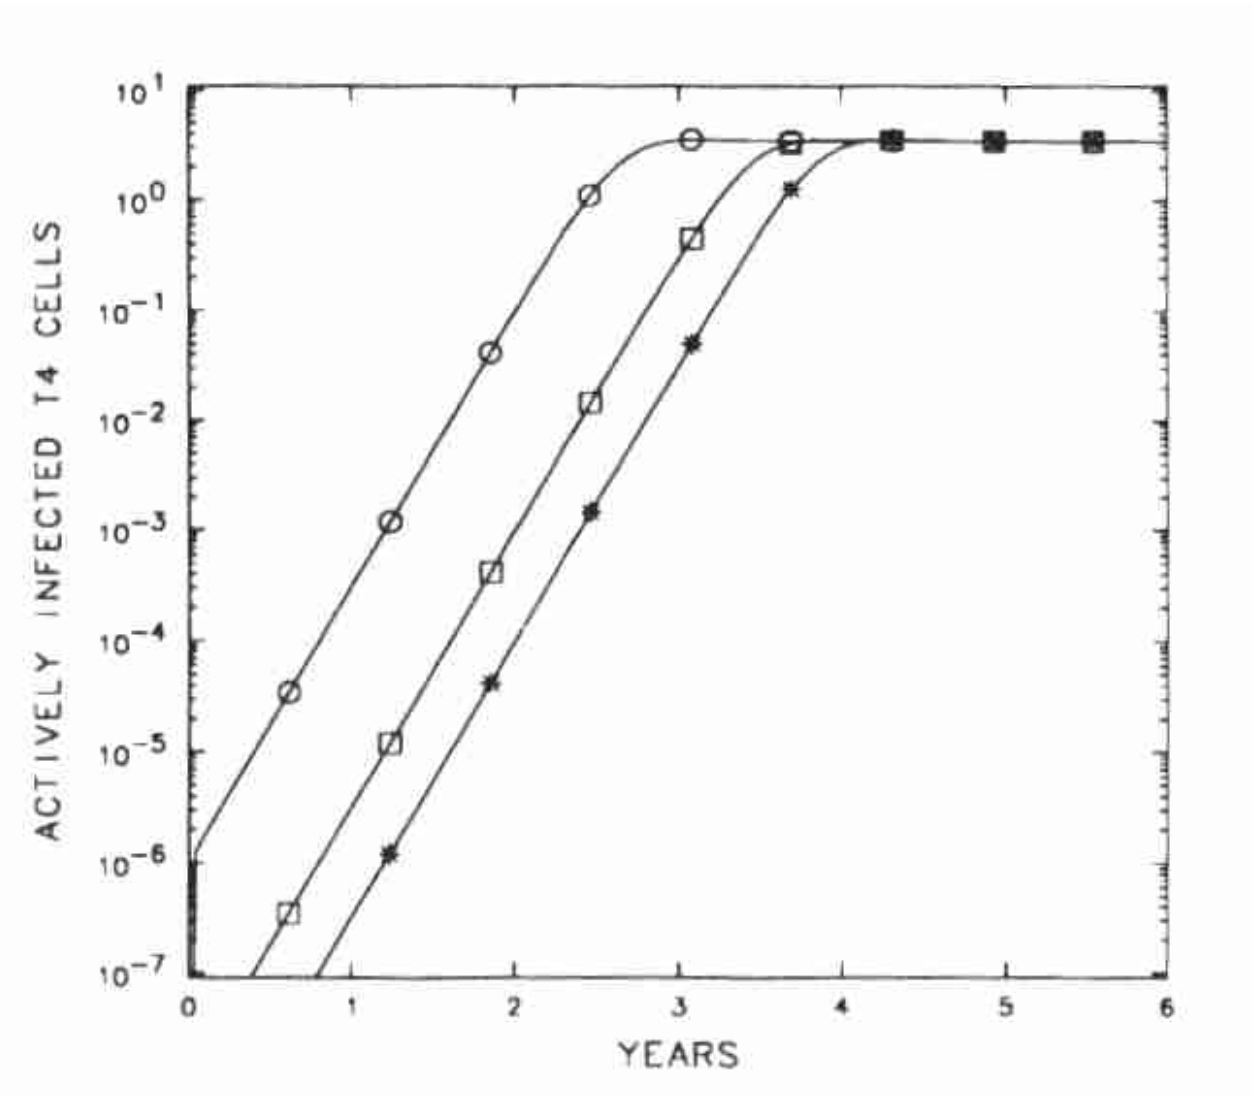

Perelson Result

$N = 1400$ ,  $V_0 = 10^{-6}$  (\*),  $10^{-4}$  ( $\square$ ), and  $10^{-2}$  ( $\circ$ )  $\text{mm}^{-3}$ .

$V_0 = 10^{-6}$

$V_0 = 10^{-4}$

$V_0 = 10^{-2}$

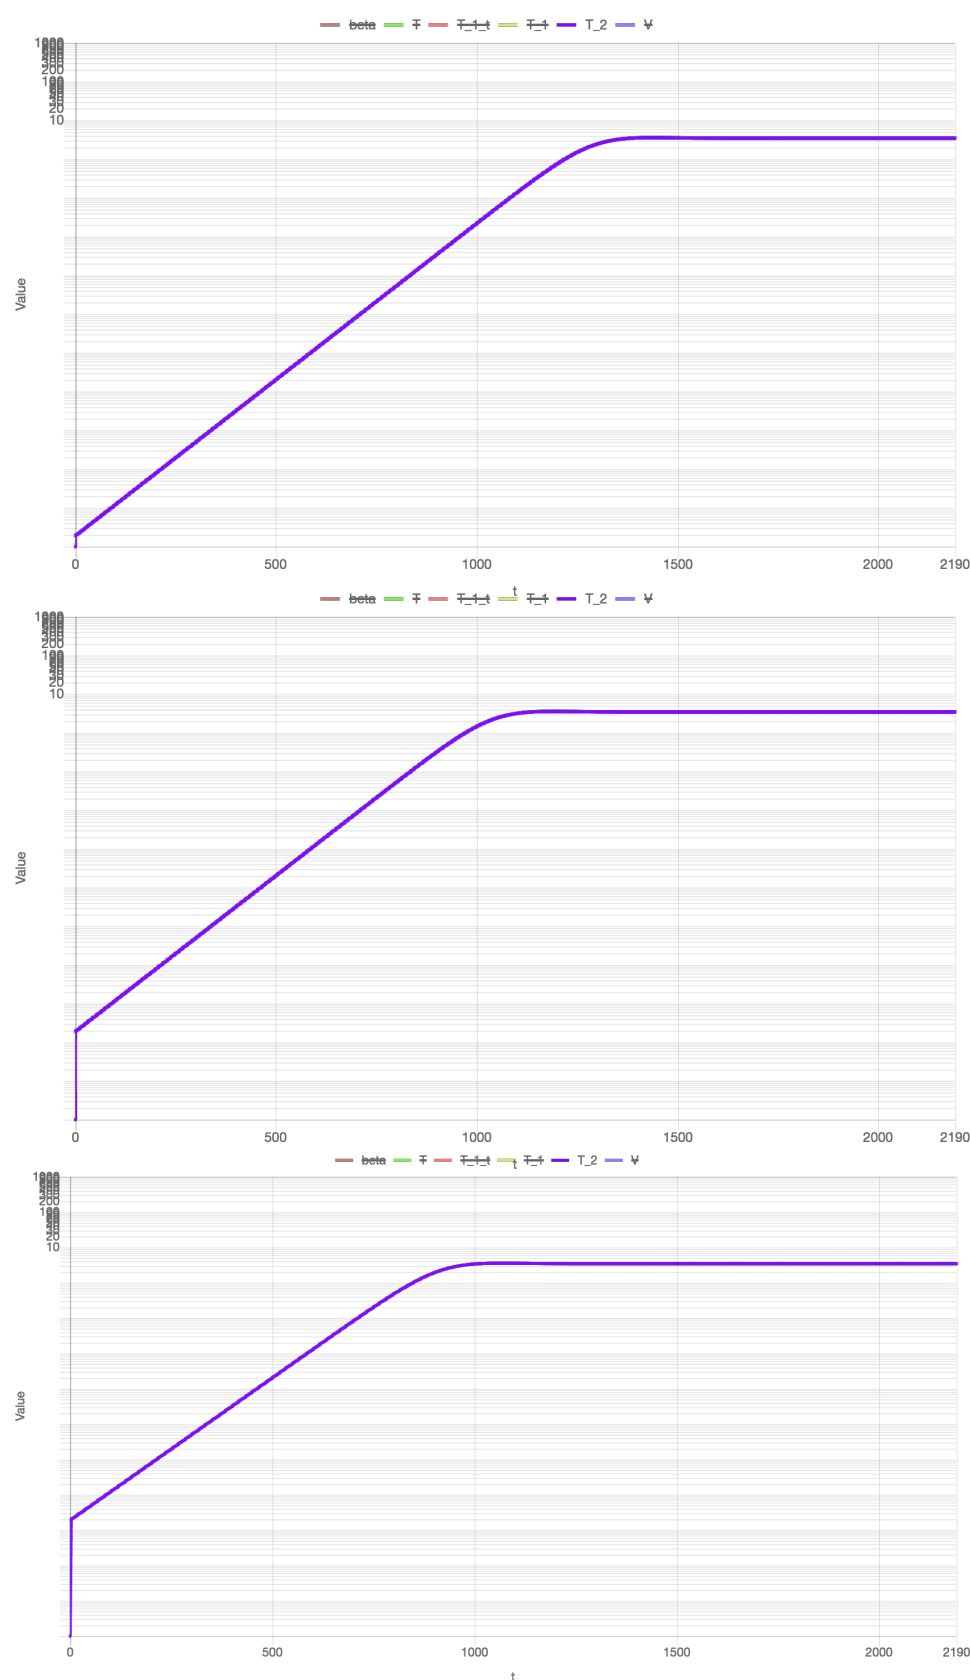

SBMLWebApp Results

Reproduction of the analysis (Simulation) : Figure 7, V

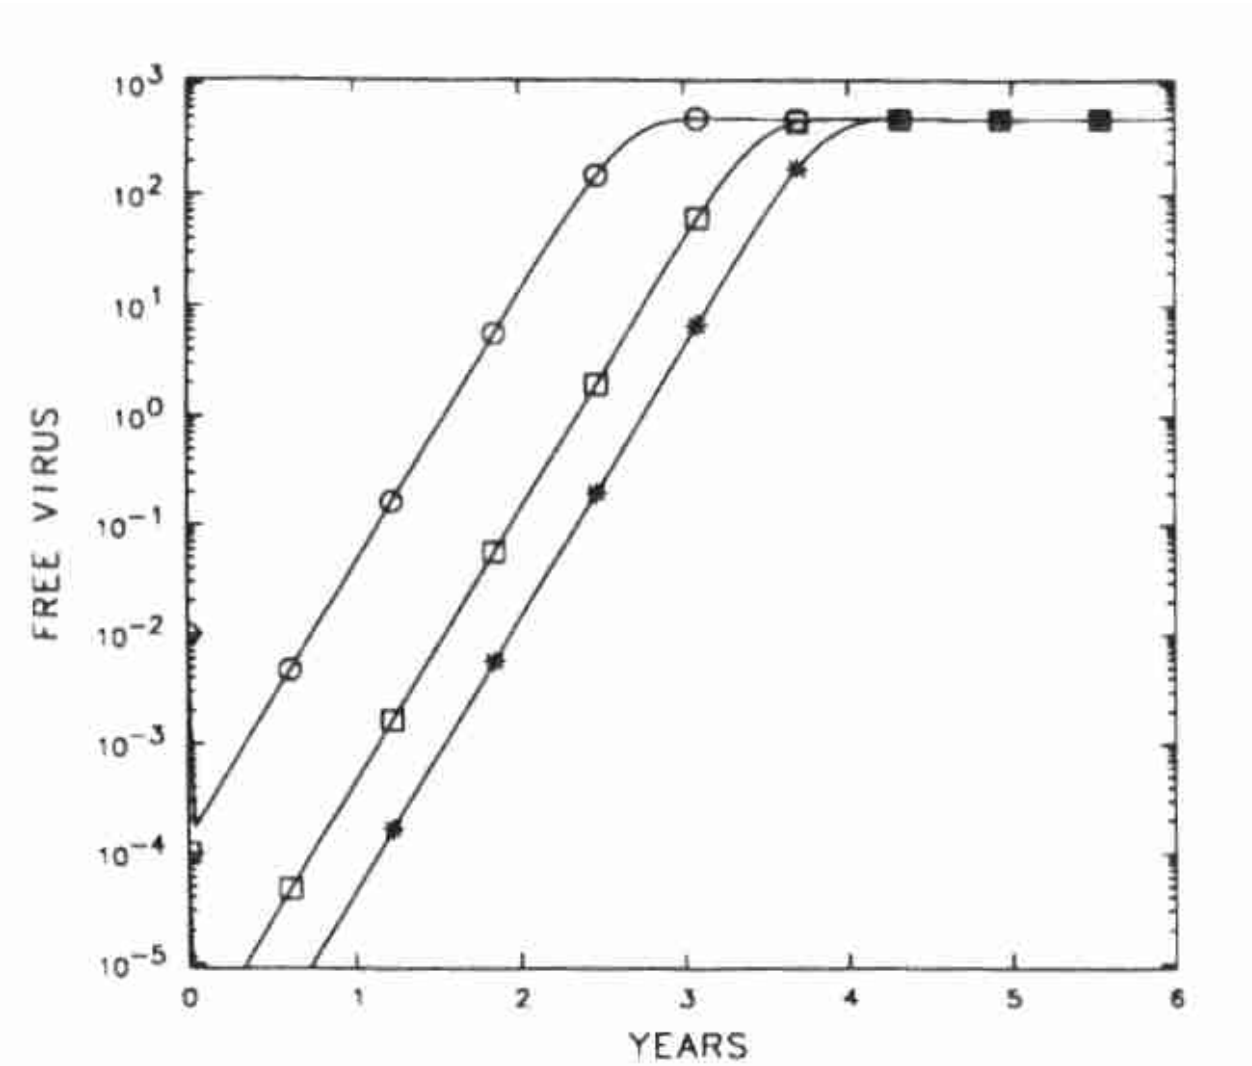

Perelson Result

$N = 1400$ ,  $V_0 = 10^{-6}$  (\*),  $10^{-4}$  ( $\square$ ), and  $10^{-2}$  ( $\circ$ )  $\text{mm}^{-3}$ .

$V_0 = 10^{-6}$

$V_0 = 10^{-4}$

$V_0 = 10^{-2}$

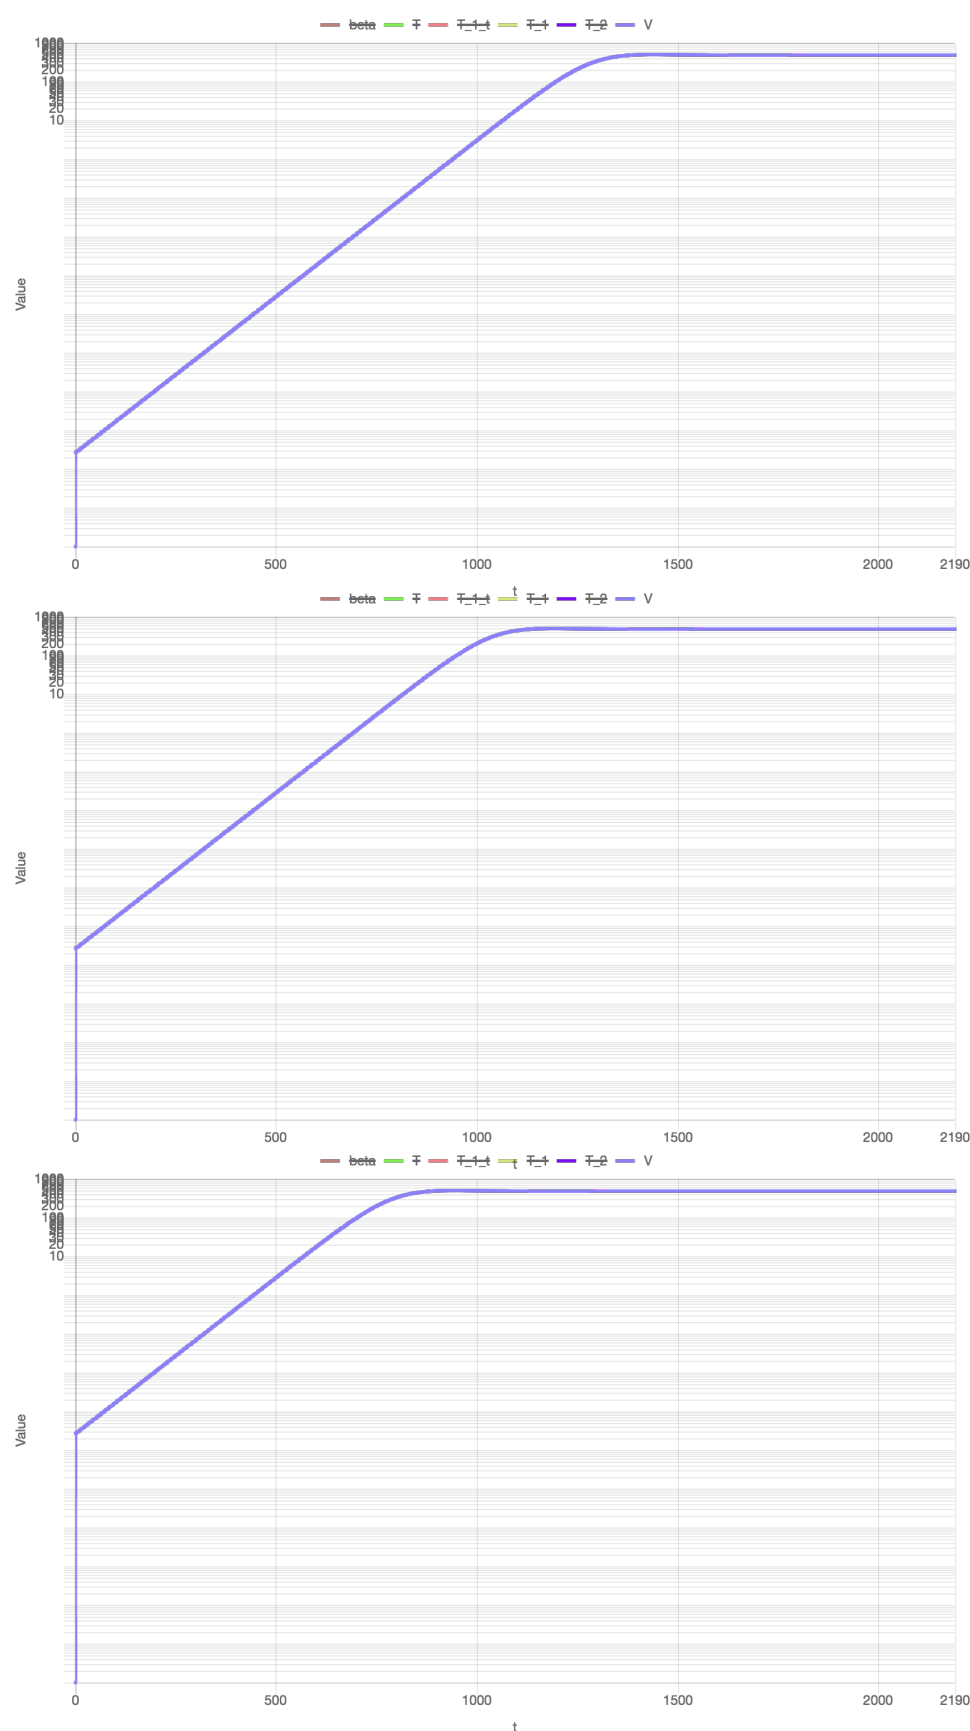

SBMLWebApp Results

Reproduction of the analysis (Simulation) : Figure 8, T

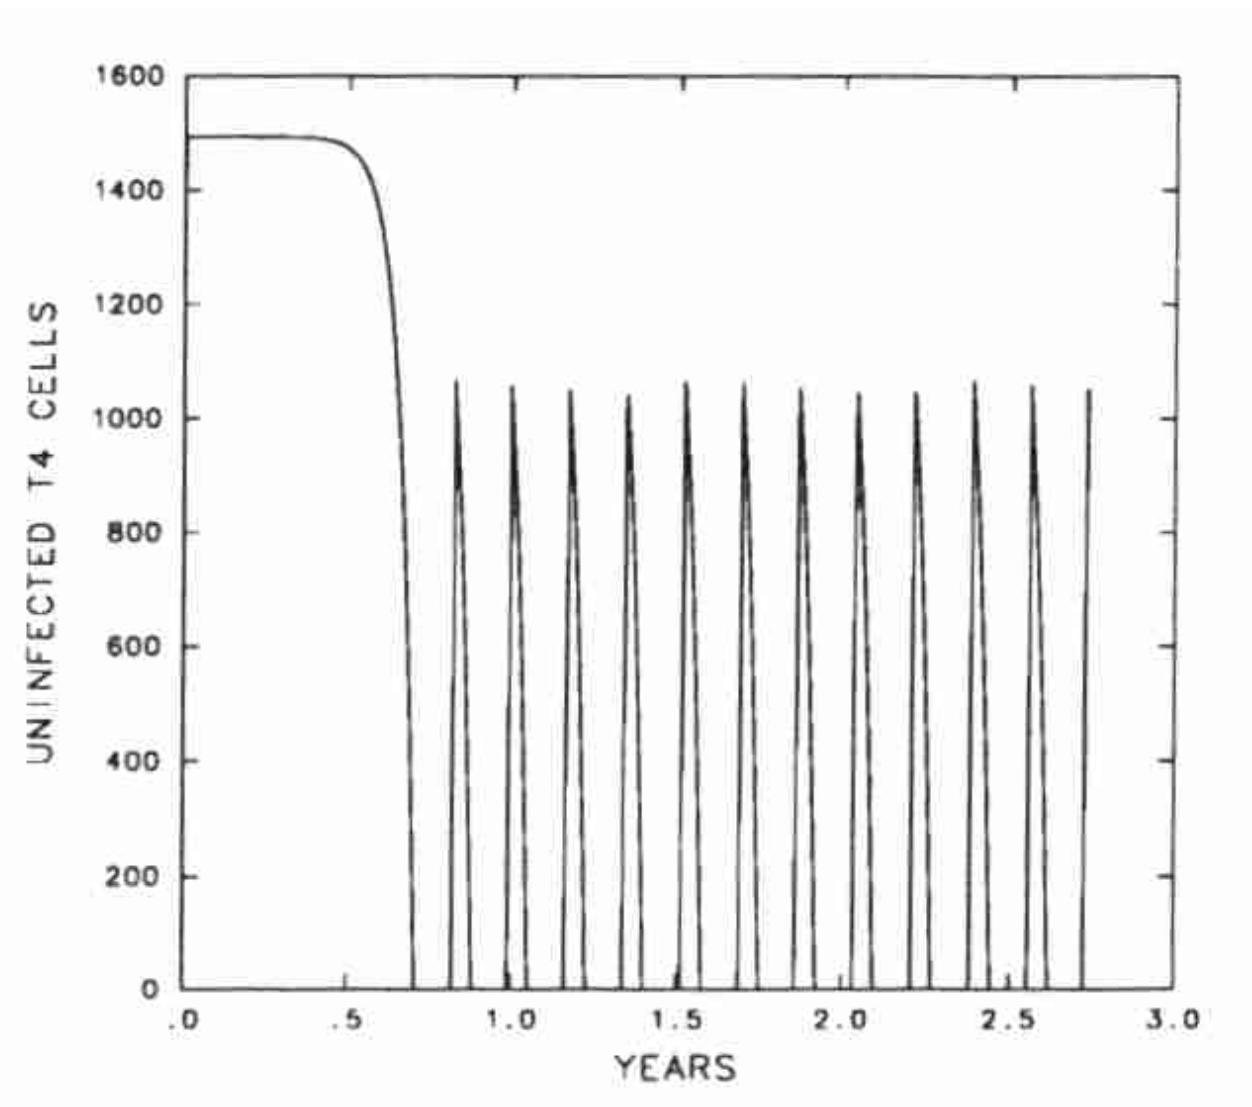

Perelson Result

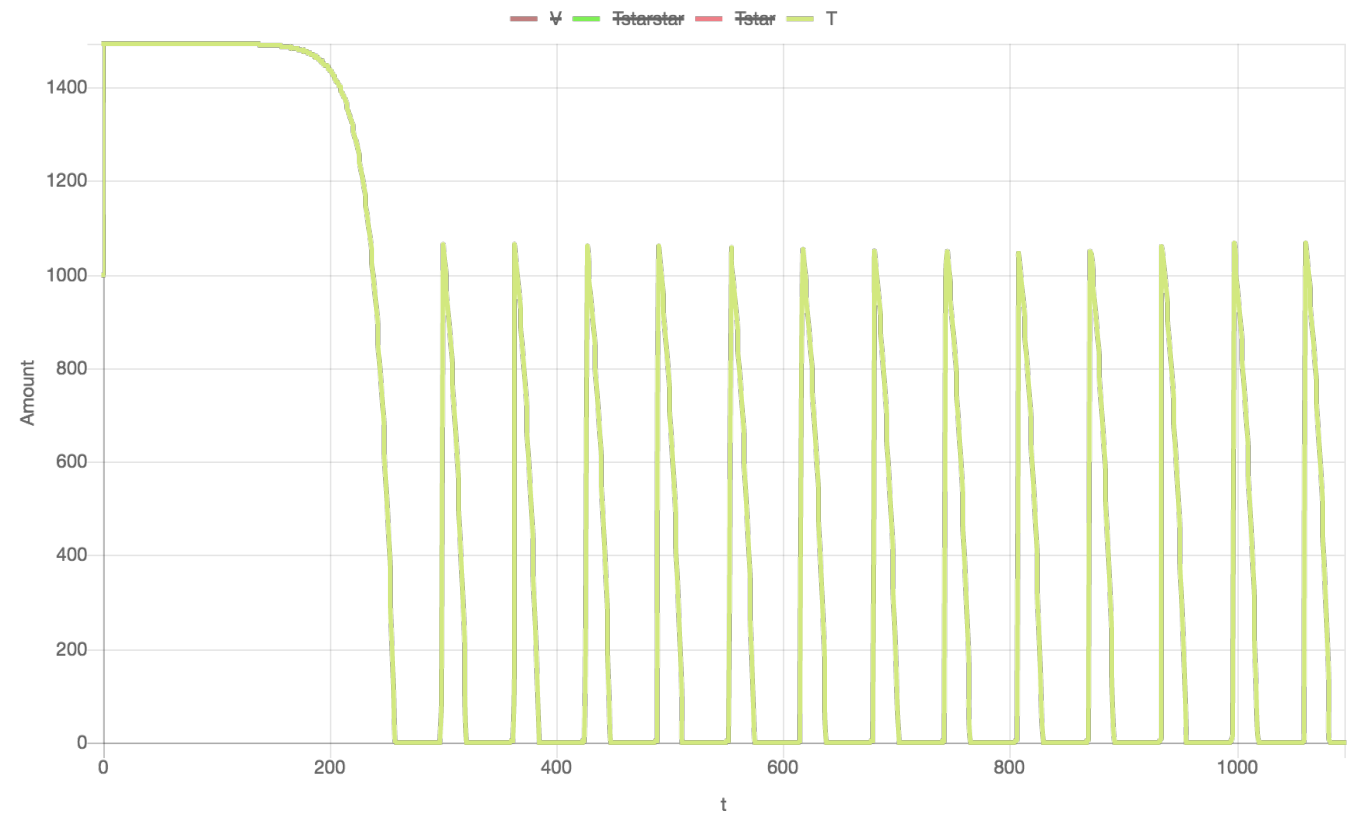

SBMLWebApp Results



Reproduction of the analysis (Simulation) : Figure 8, Tstar

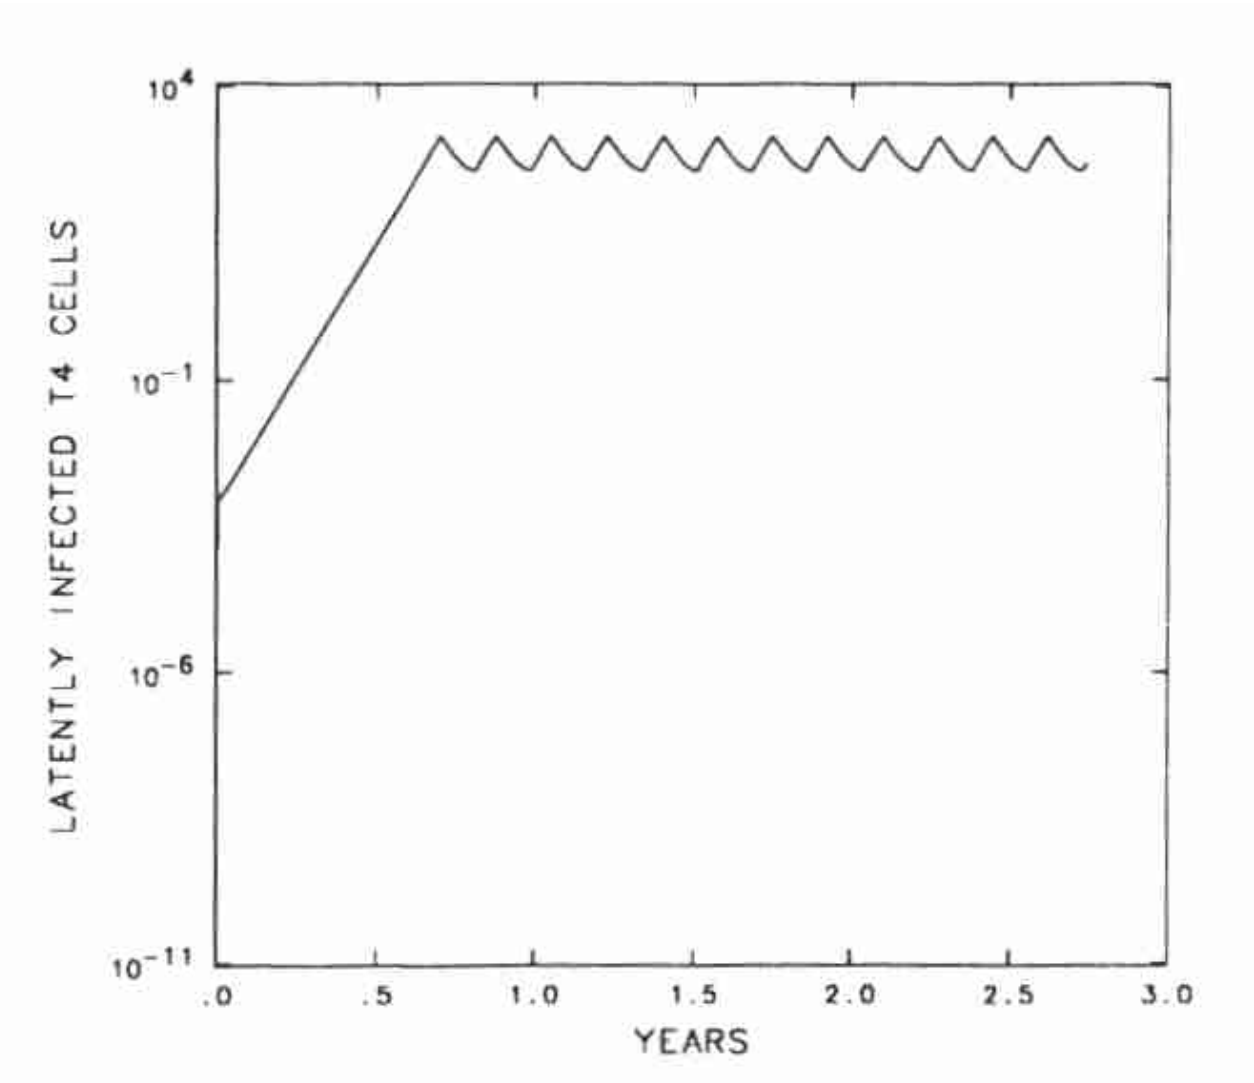

Perelson Result

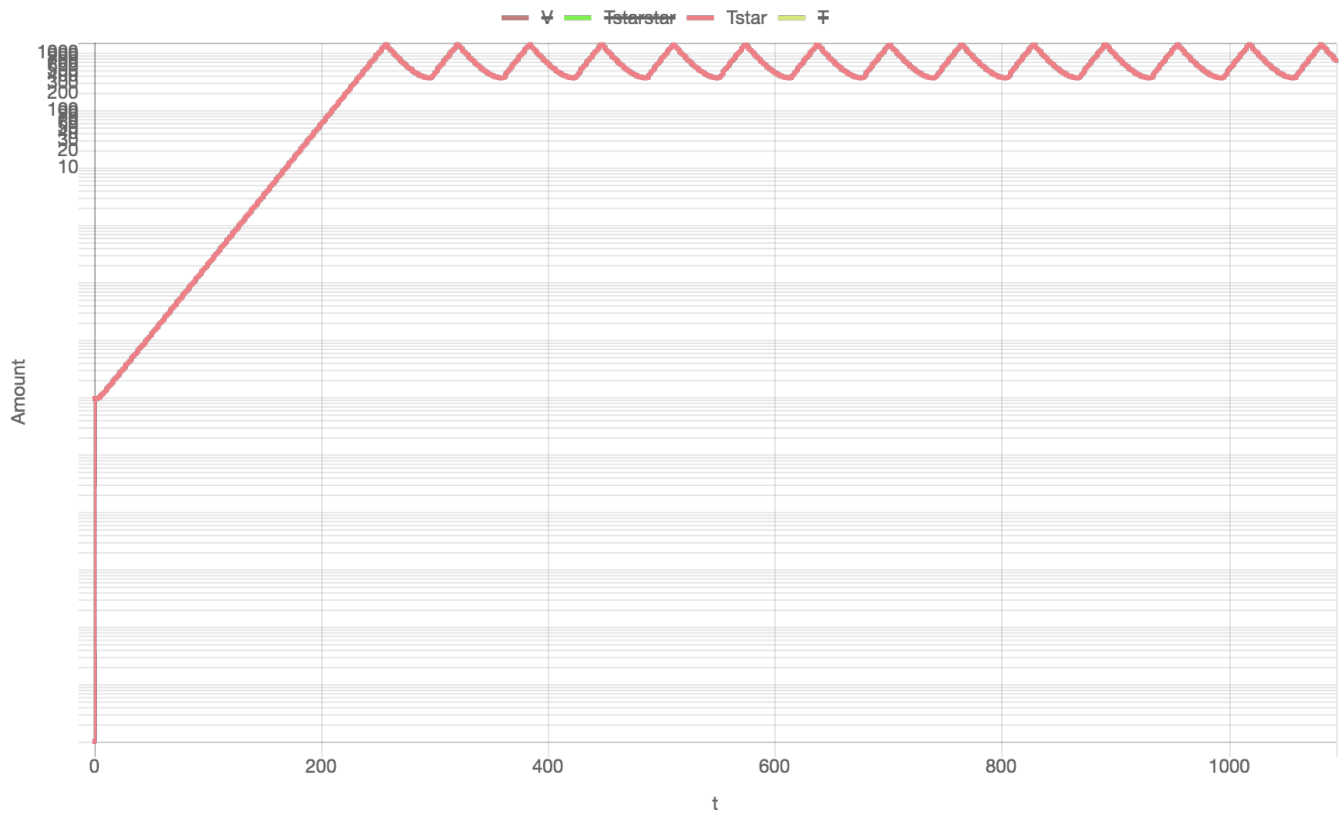

SBMLWebApp Results



Reproduction of the analysis (Simulation) : Figure 8, Tstarstar

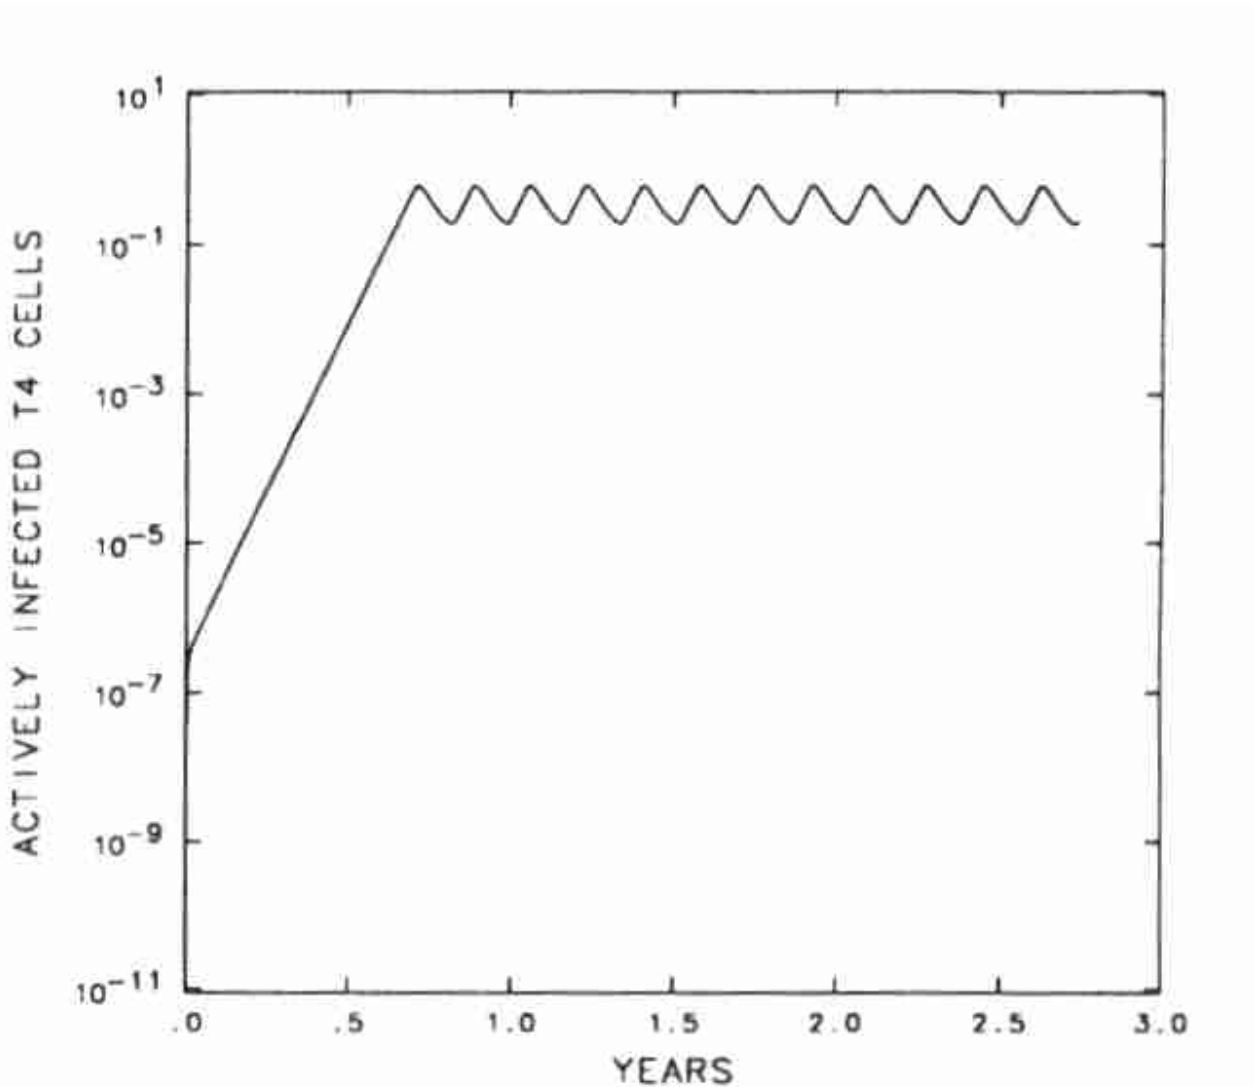

Perelson Result

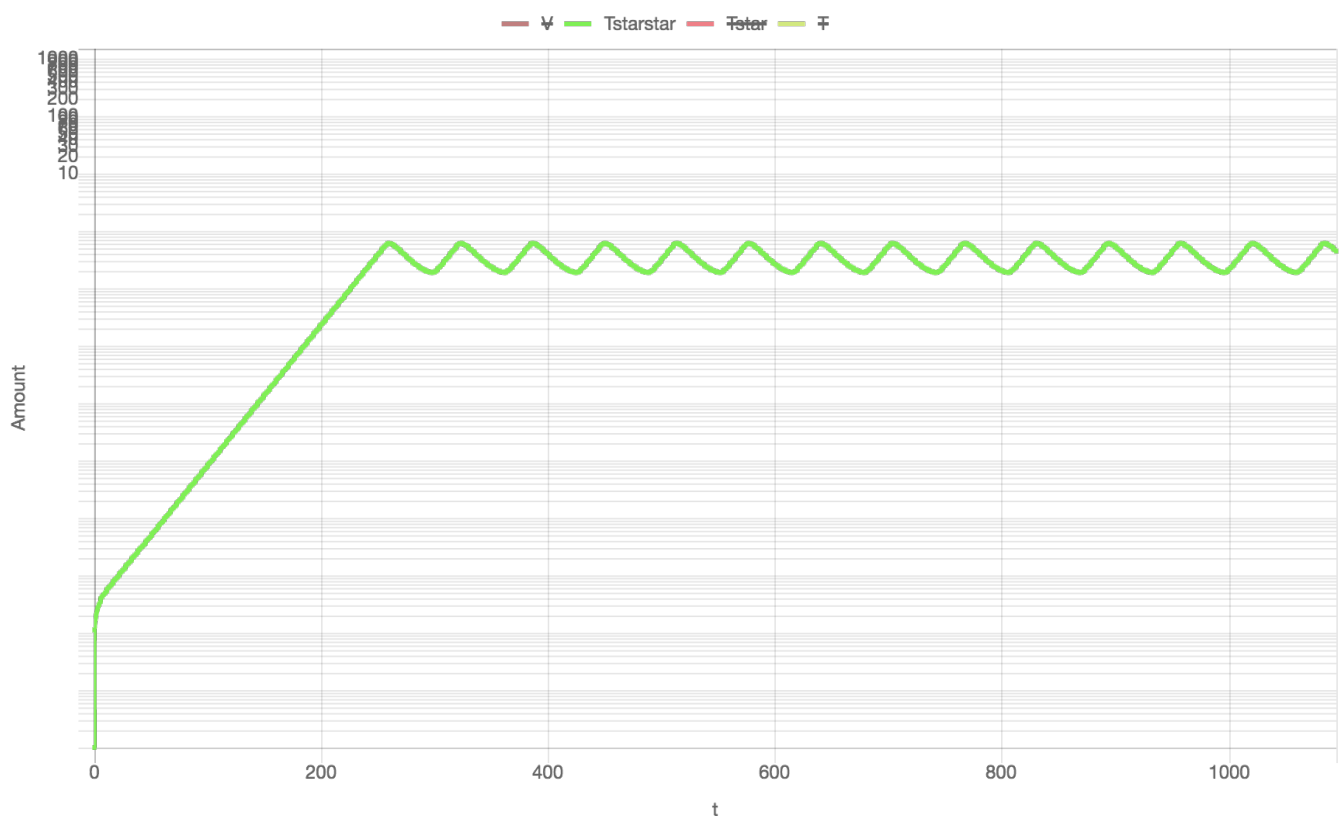

SBMLWebApp Results

Reproduction of the analysis (Simulation) : Figure 8, V

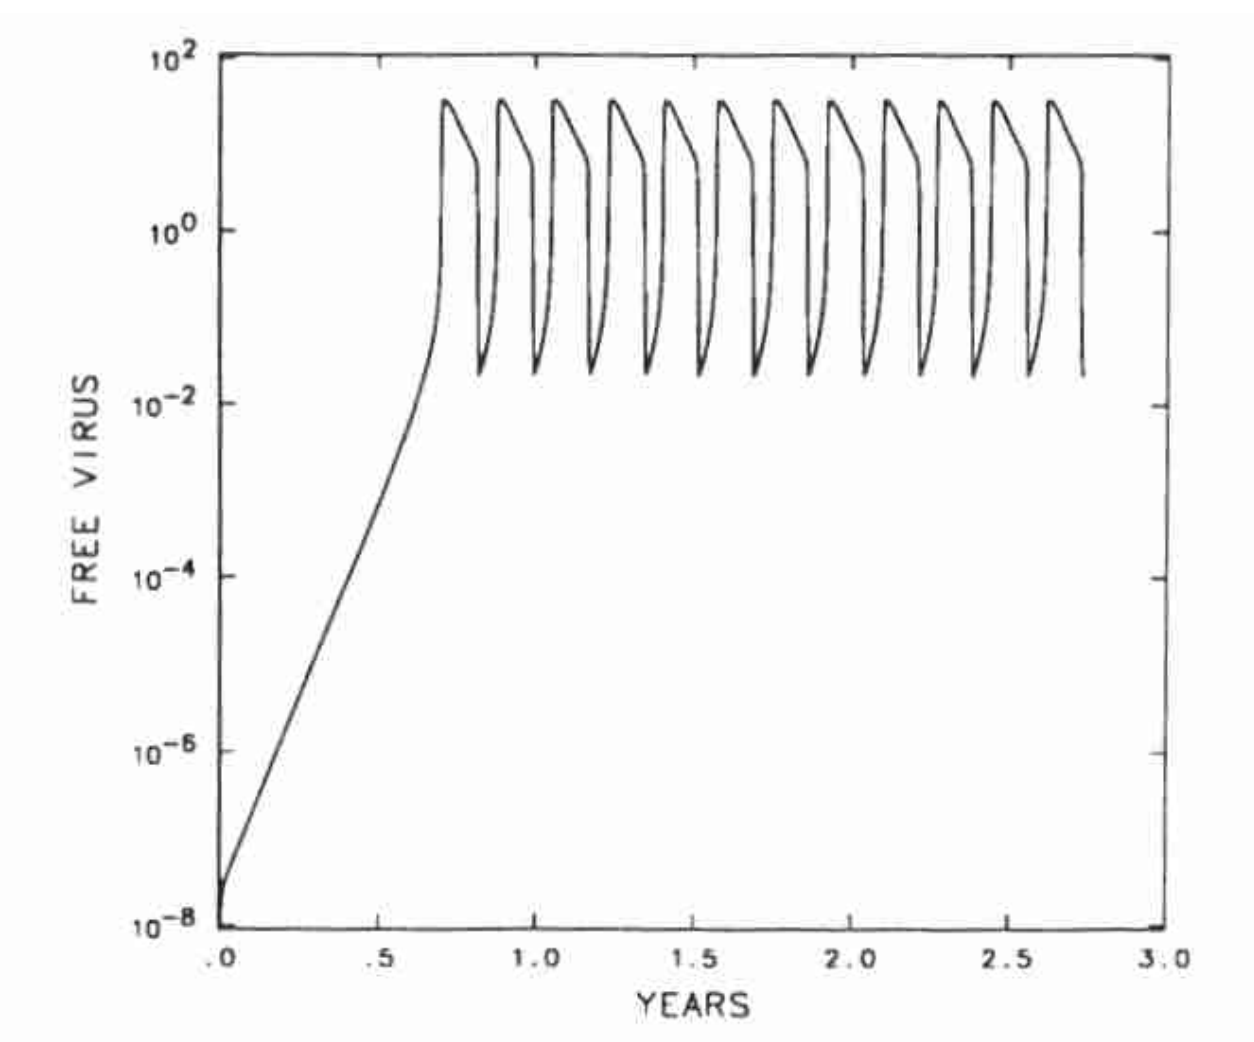

Perelson Result

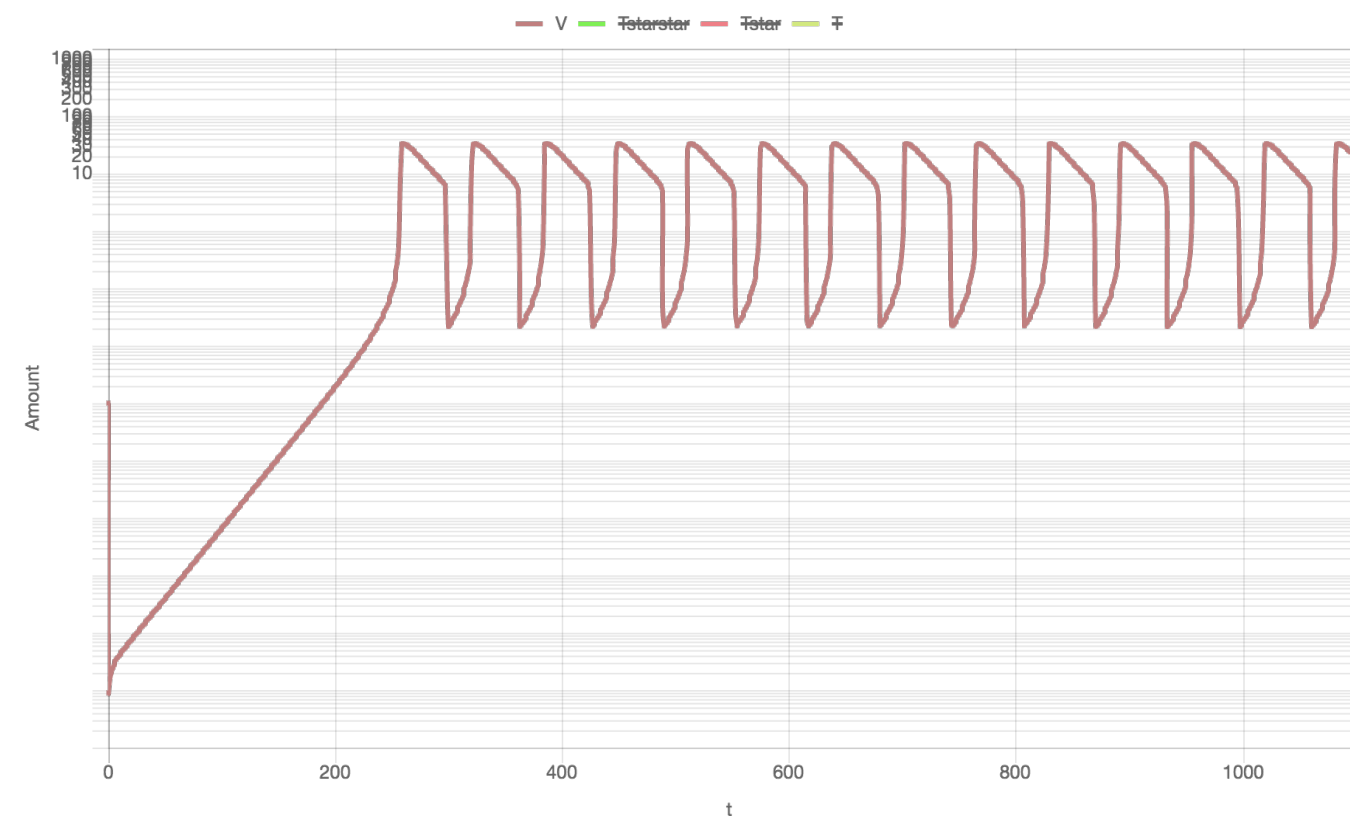

SBMLWebApp Results

# Reproduction of Steady State Analysis

Reproduction of the analysis (Steady State Analysis) : In Table 1, Unstable Fixed Point

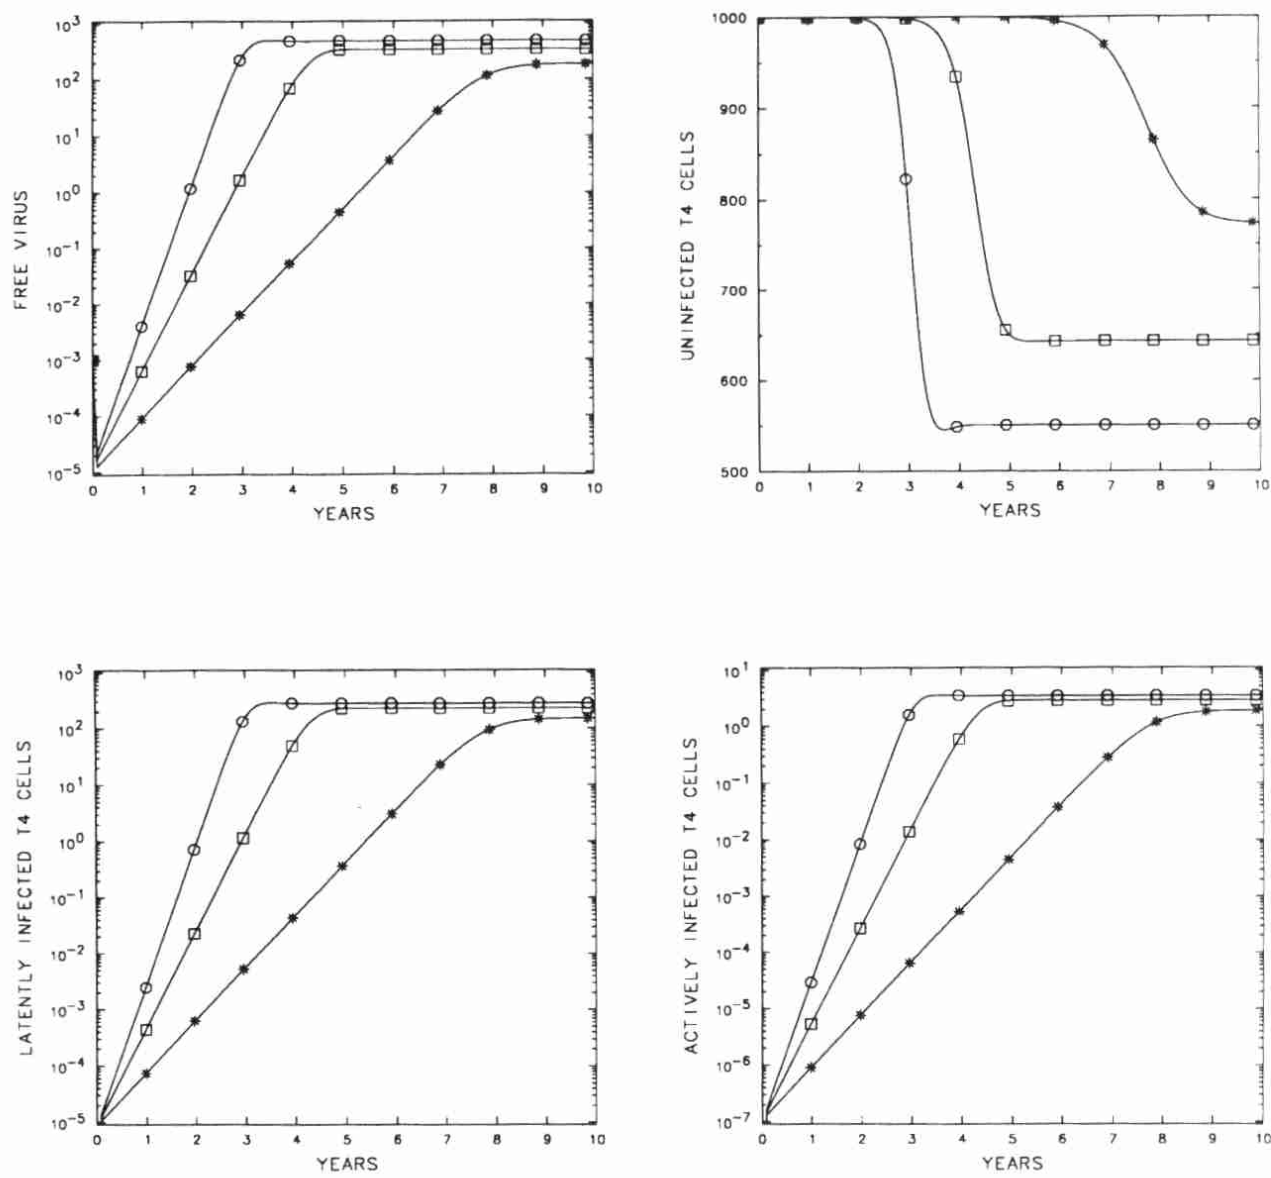

Unstable Fixed Point = 
$$\begin{cases} V = 0 \\ Tstarstar = 0 \\ Tstar = 0 \\ T = 1000 \end{cases}$$

Perelson Result

PerelsonModel\_Table1\_result\_SteadyState

| Name      | Type      | Concentration (mol/l) | Rate (mol/l/s)  | Transition Time (s) |
|-----------|-----------|-----------------------|-----------------|---------------------|
| V         | REACTIONS | 8.88696582051918E-23  | -5.641328087473 | 0.1575332205948450  |
| Tstarstar | REACTIONS | -1.45296982190835E-24 | 9.954254905636  | 4.166666666666670   |
| Tstar     | REACTIONS | -1.16237582434583E-22 | 4.8063361929200 | 24.18423883993120   |
| T         | REACTIONS | 1000.0000000000000    | 3.5659804361829 | 50.00000000000000   |

KINETIC STABILITY ANALYSIS

The linear stability analysis based on the eigenvalues of the Jacobian matrix is only valid for steady states.

Summary:

This state is unstable.

Eigenvalue statistics:

- Largest real part: 0.005917614529102015
- Largest absolute imaginary part: 0
- 4 are purely real
- 0 are purely imaginary
- 0 are complex
- 0 are equal to zero
- 1 have positive real part
- 3 have negative real part
- stiffness = 409.0660459649154
- time hierarchy = 0.758277462876047

SBMLWebApp Results

Reproduction of the analysis (Steady State Analysis) : In Table 1, Stable Fixed Point



Stable Fixed Point = 
$$\begin{cases} V = 185.7818 \\ Tstarstar = 1.872171 \\ Tstar = 149.7737 \\ T = 772.5899 \end{cases}$$

Perelson Result

SBMLWebApp Results

PerelsonModel\_Table1\_result\_SteadyState

| Name      | Type      | Concentration (mol/l) | Rate (mol/l/s)       | Transition Time (s) |
|-----------|-----------|-----------------------|----------------------|---------------------|
| V         | REACTIONS | 185.7818104642200     | 0                    | 0.4134722222222220  |
| Tstarstar | REACTIONS | 1.8721714188534100    | 0                    | 4.166666666666670   |
| Tstar     | REACTIONS | 149.7737135082730     | -4.45747554522868E-1 | 43.478260869565200  |
| T         | REACTIONS | 772.5898555592880     | 0                    | 40.88514131131750   |

KINETIC STABILITY ANALYSIS

The linear stability analysis based on the eigenvalues of the Jacobian matrix is only valid for steady states.

Summary:

This state is asymptotically stable.

Eigenvalue statistics:

- Largest real part: -0.007580073808920534
- Largest absolute imaginary part: 0
- 4 are purely real
- 0 are purely imaginary
- 0 are complex
- 0 are equal to zero
- 0 have positive real part
- 4 have negative real part
- stiffness = 318.73143300999254
- time hierarchy = 0.6165738196777563

# Reproduction of the analysis (Steady State Analysis) : In Table 8, Unstable Fixed Point (With Oscillation)

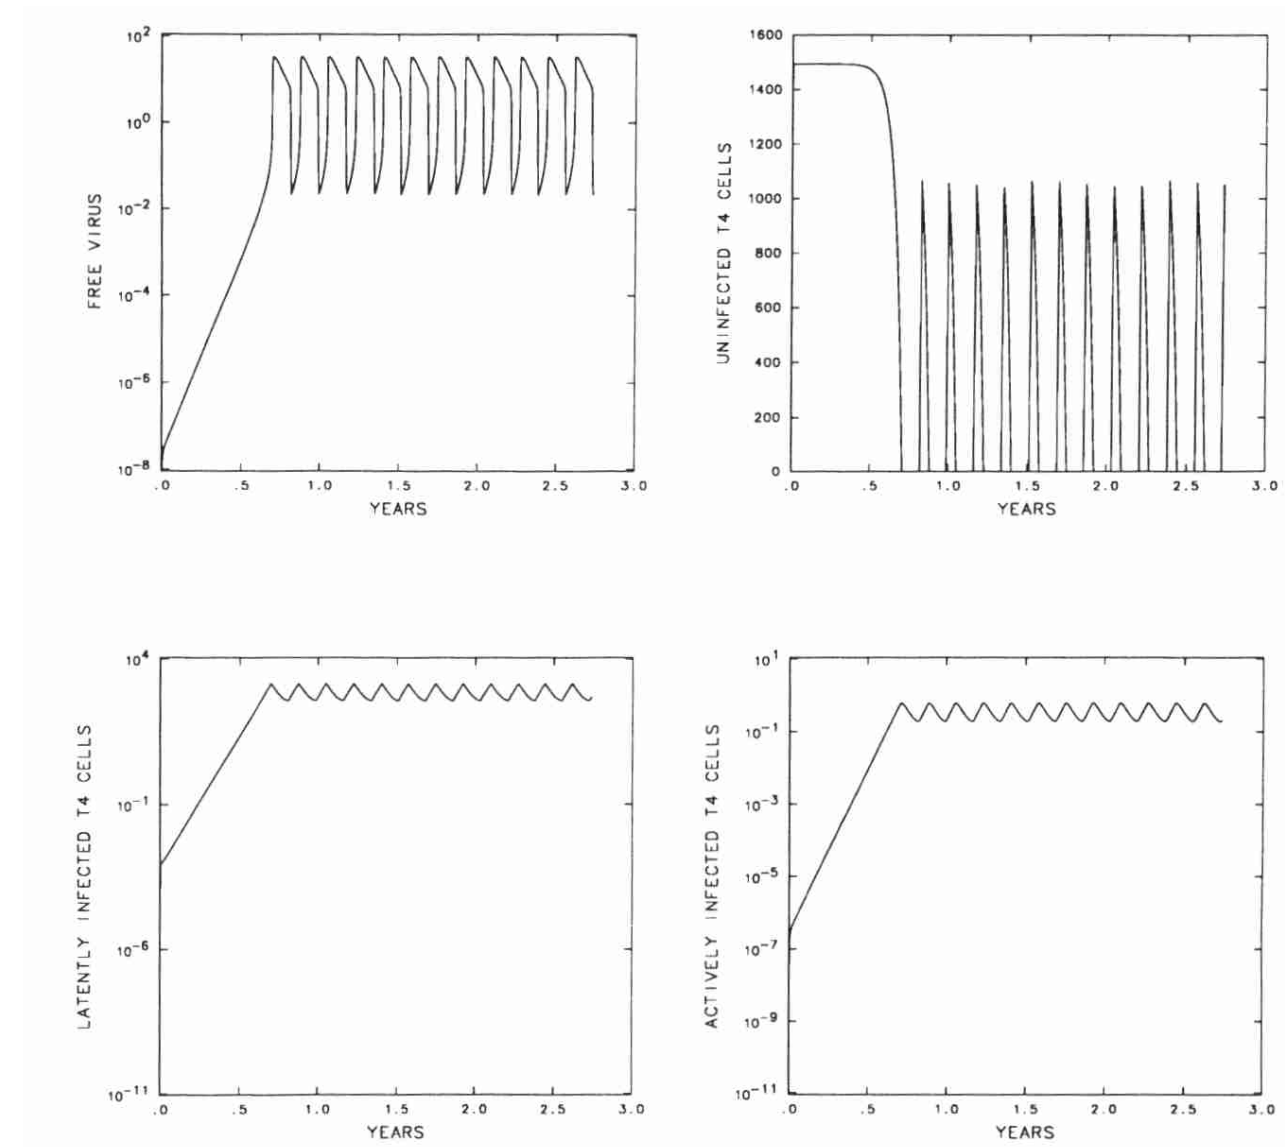

Unstable Fixed Point  
(With Oscillation)

=

$$\begin{cases} V = 6.47353 \\ Tstarstar = 0.1929402 \\ Tstar = 385.8805 \\ T = 1.493205 \end{cases}$$

Perelson Result

PerelsonModel\_CalibratedForReproductionOfFigure8\_result\_SteadyState

| Name      | Type      | Concentration (mol/l) | Rate (mol/l/s)      | Transition Time (s) |
|-----------|-----------|-----------------------|---------------------|---------------------|
| V         | REACTIONS | 6.473530498547430     | 7.13196087236589E-1 | 0.1165              |
| Tstarstar | REACTIONS | 0.1929402270668640    | 0                   | 4.166666666666670   |
| Tstar     | REACTIONS | 385.88045413372900    | -3.56598043618295E- | 16.633399866932800  |
| T         | REACTIONS | 1.4932045779685300    | 3.56598043618295E-1 | 0.06411705950442200 |

## KINETIC STABILITY ANALYSIS

The linear stability analysis based on the eigenvalues of the Jacobian matrix is only valid for steady states.

### Summary:

This state is unstable.  
Transient states in its vicinity have oscillatory components.

### Eigenvalue statistics:

- Largest real part: 0.055057250755708095
- Largest absolute imaginary part: 0.3994090482034272
- The complex eigenvalues with the largest real part are: 0.055057250755708095+I-0.3994090482034272 i
- 2 are purely real
- 0 are purely imaginary
- 2 are complex
- 0 are equal to zero
- 2 have positive real part
- 2 have negative real part
- stiffness = 275.30517651142844
- time hierarchy = 0.5719767225716659

SBMLWebApp Results

# Reproduction of Parameter Estimation



# Reproduction of the analysis (Parameter Estimation) : For Patient 1 (pt1)

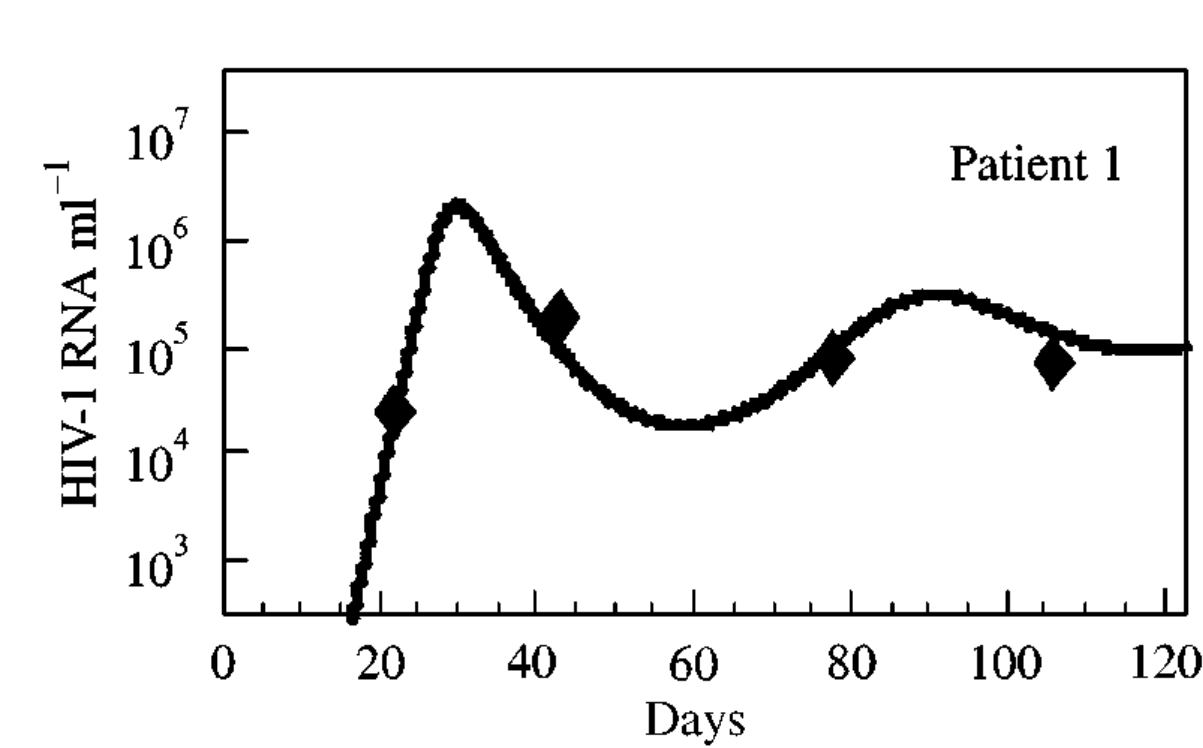

Perelson Result

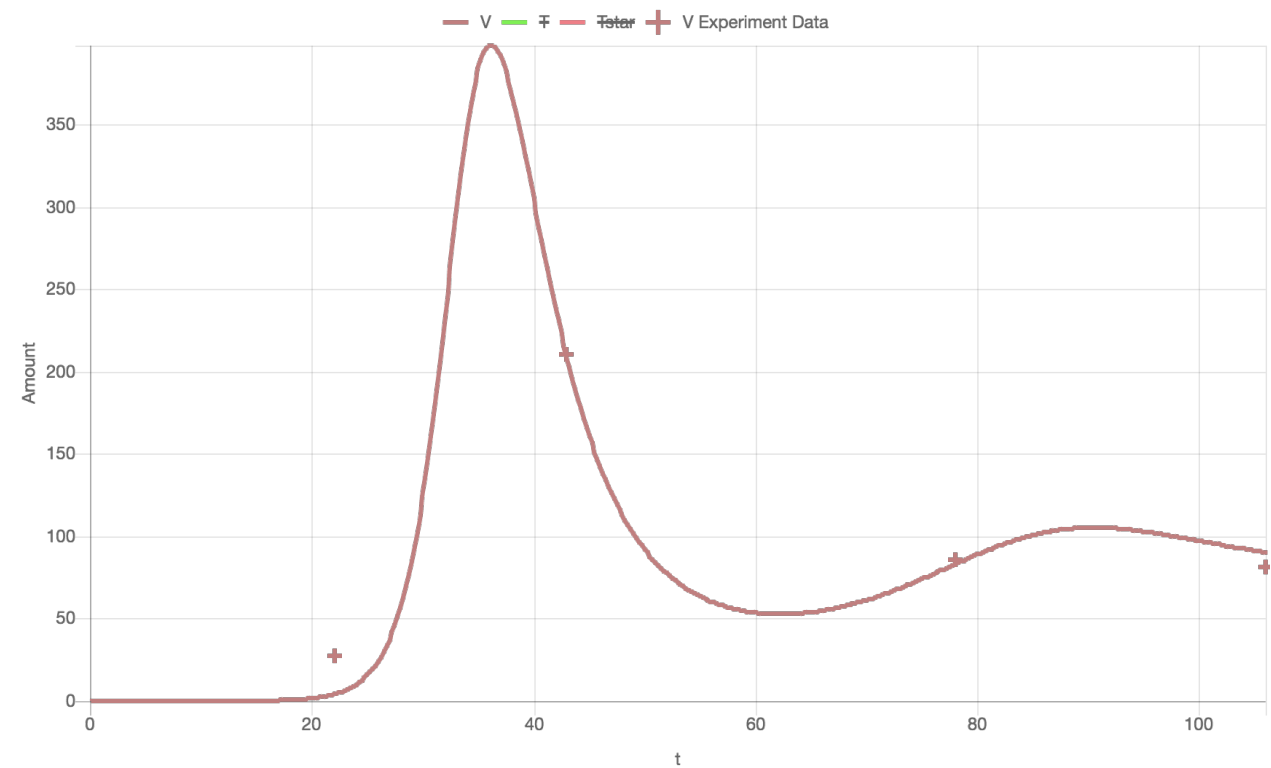

SBMLWebApp Results



# Reproduction of the analysis (Parameter Estimation) : For Patient 2 (pt2)

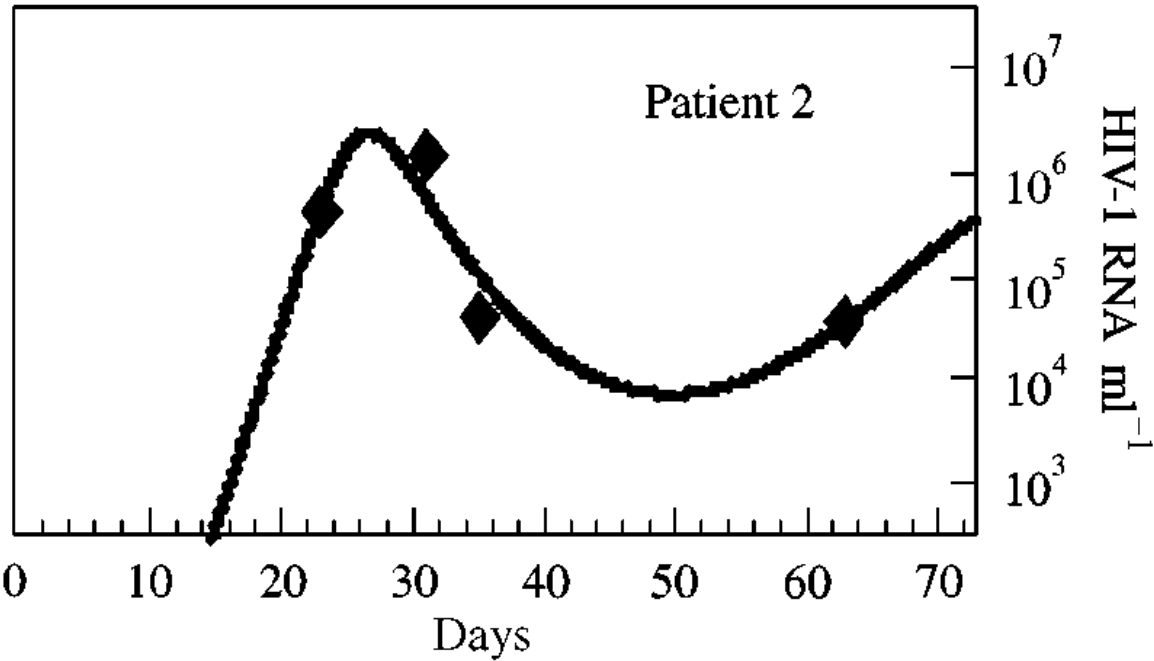

Perelson Result

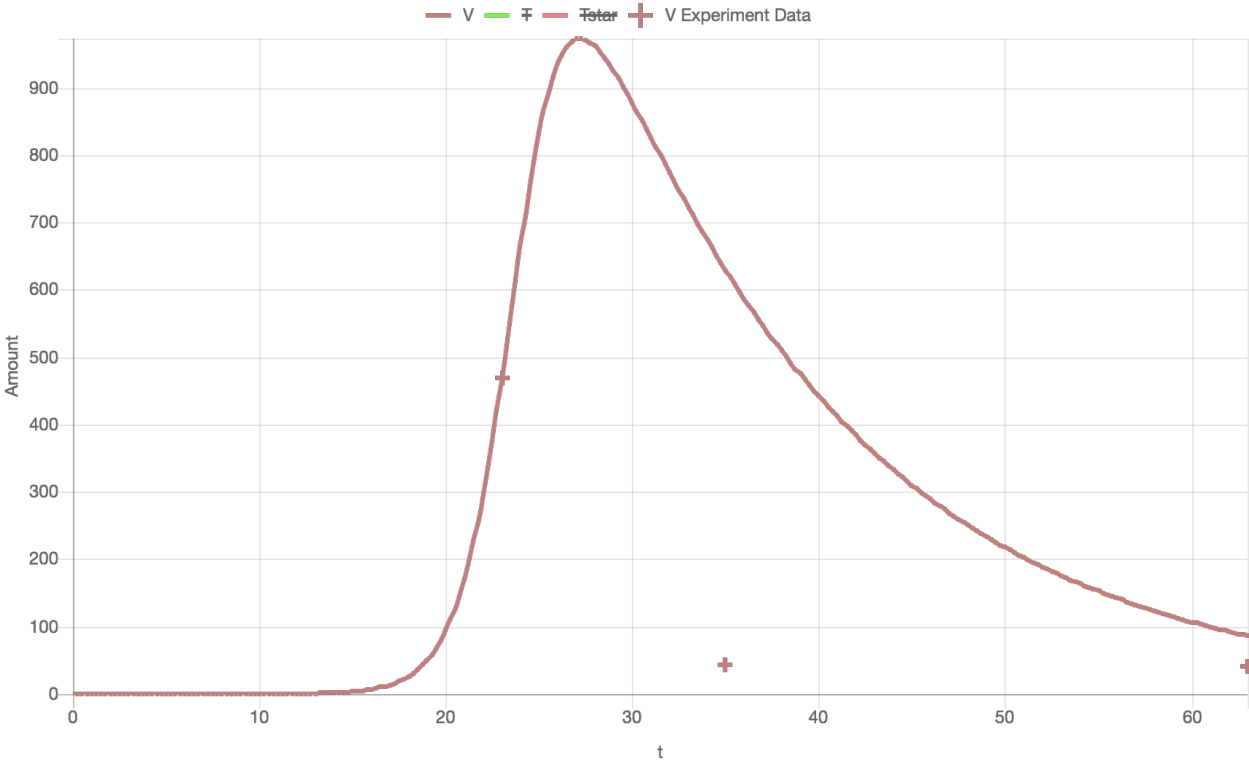

SBMLWebApp Results

# Reproduction of the analysis (Parameter Estimation) : For Patient 3 (pt3)

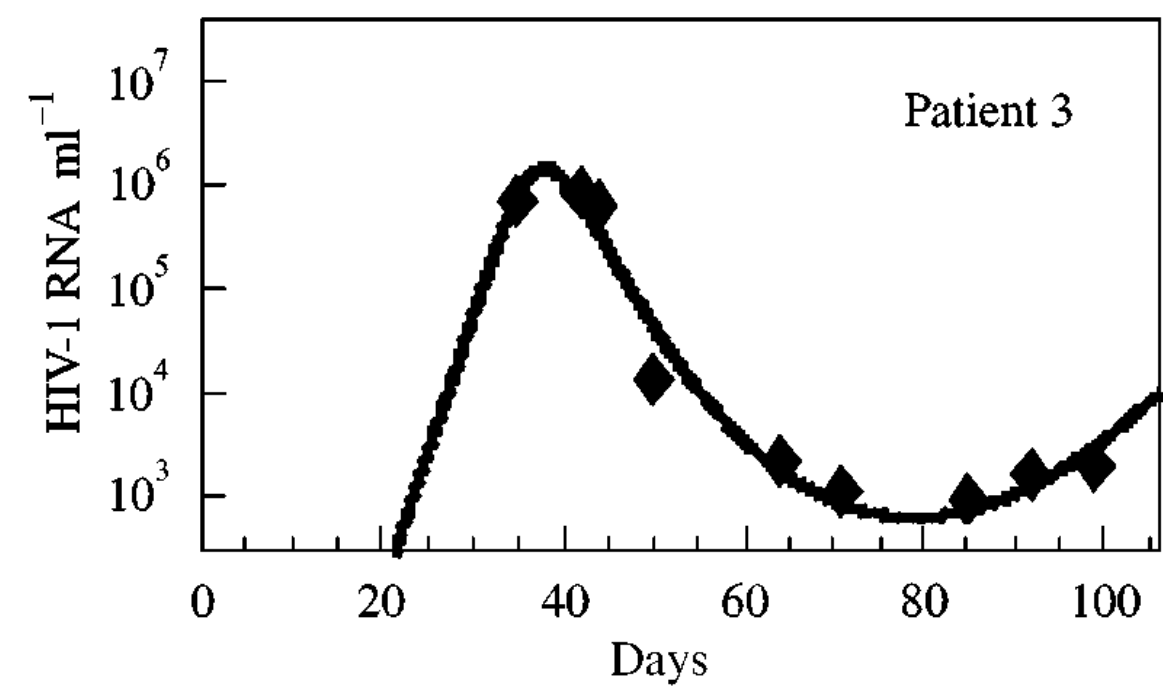

Perelson Result

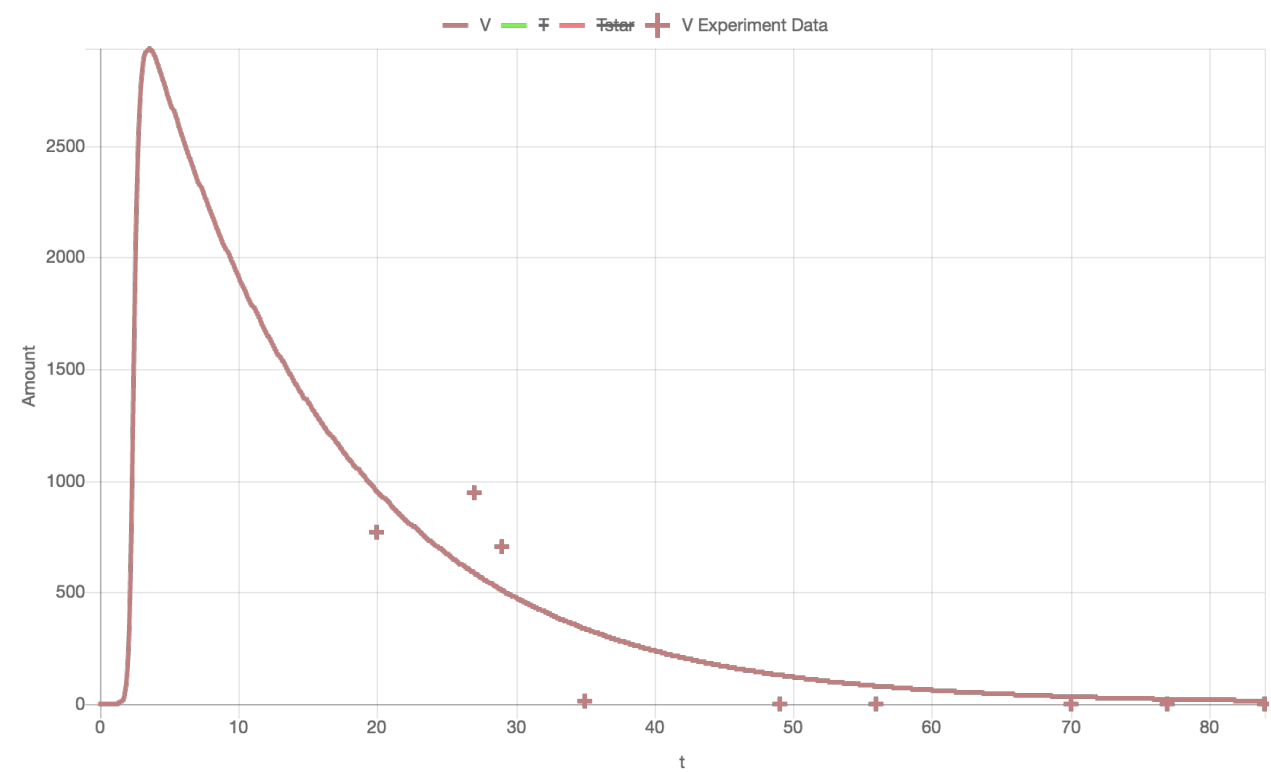

SBMLWebApp Results

# Reproduction of the analysis (Parameter Estimation) : For Patient 4 (pt4)

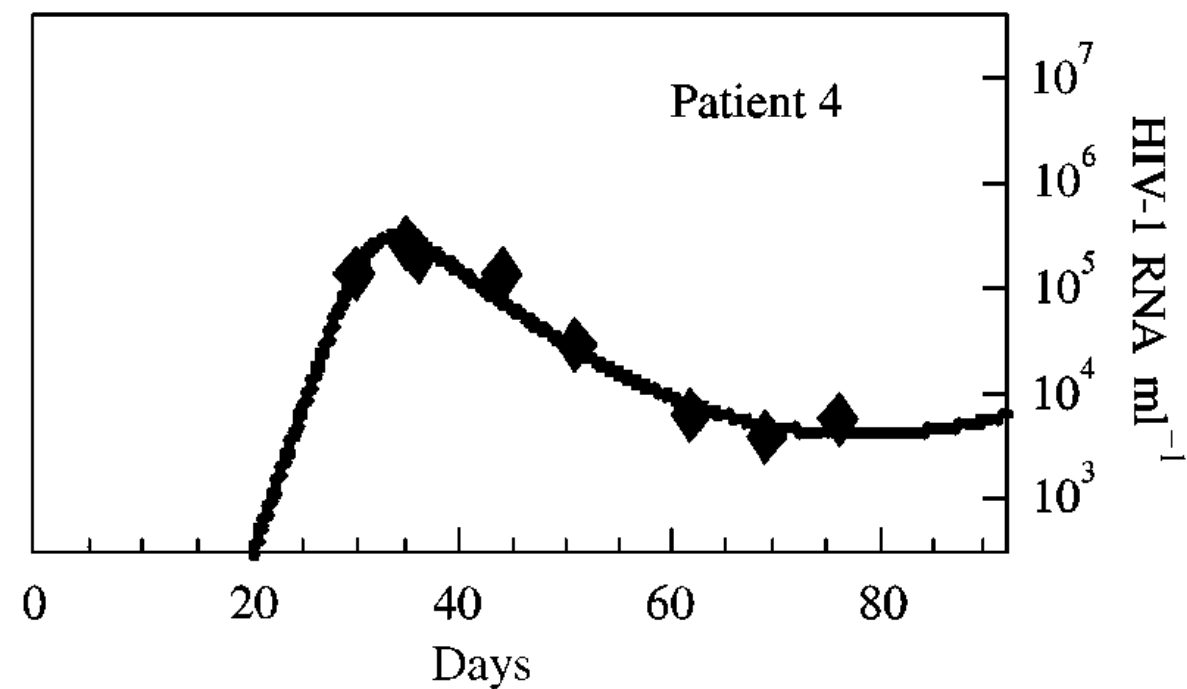

Perelson Result

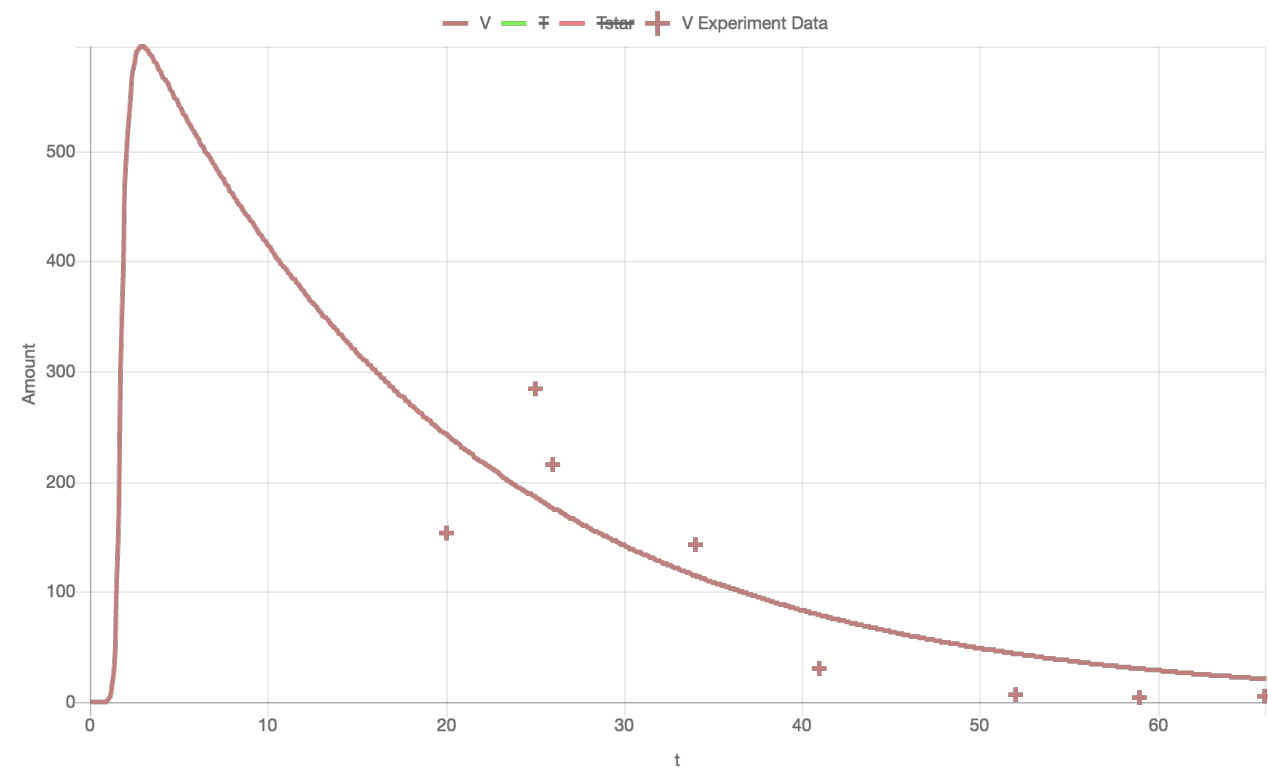

SBMLWebApp Results

# Reproduction of the analysis (Parameter Estimation) : For Patient 5 (pt5)

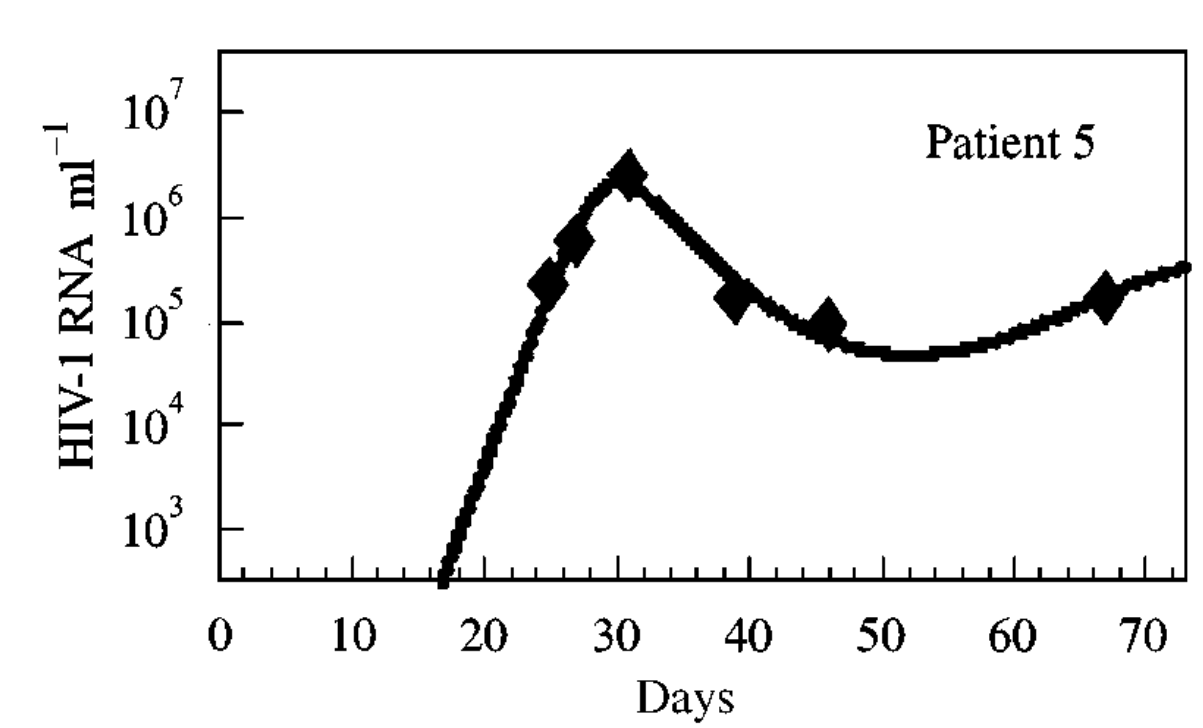

Perelson Result

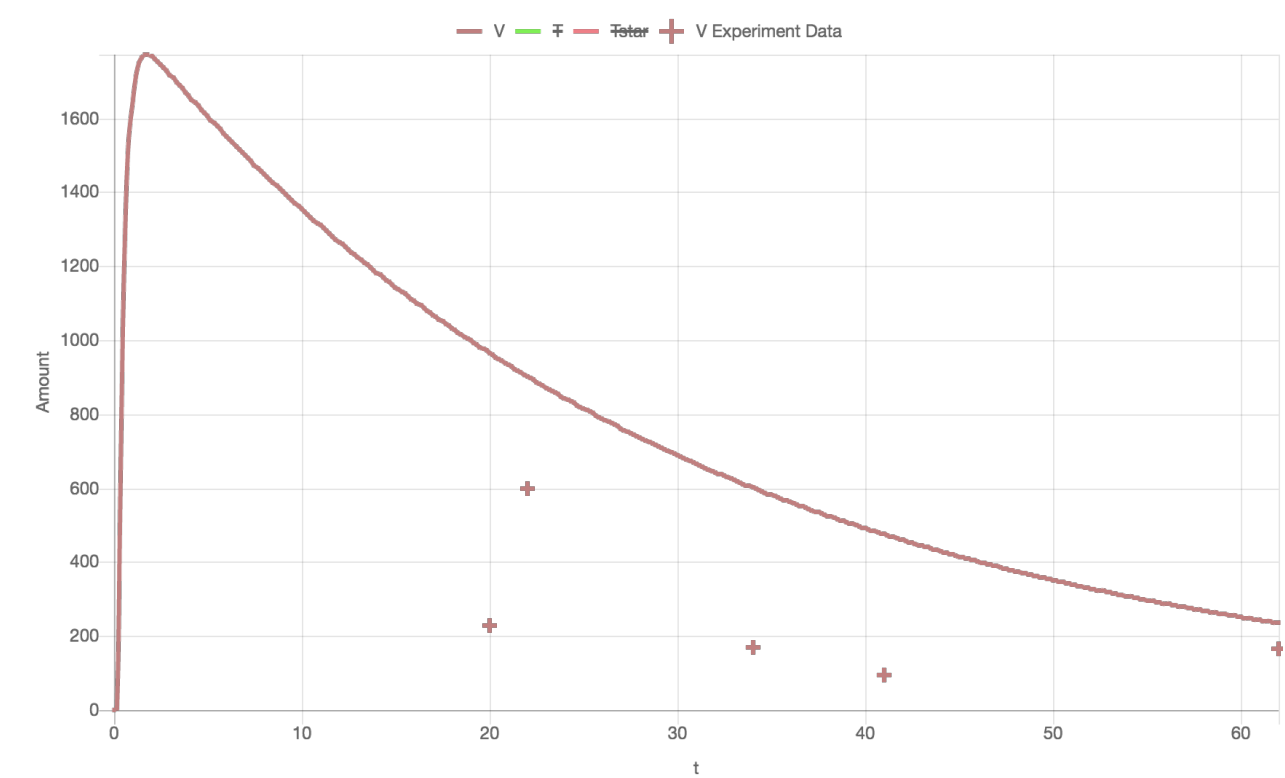

SBMLWebApp Results

# Reproduction of the analysis (Parameter Estimation) : For Patient 6 (pt6)

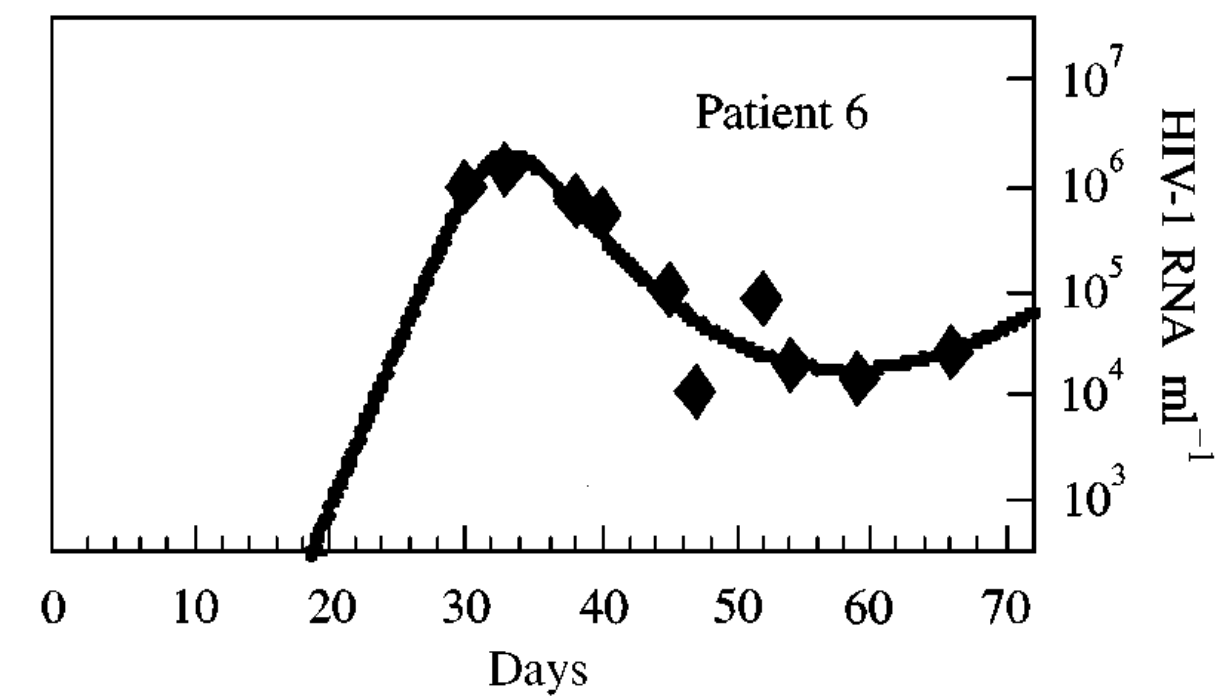

Perelson Result

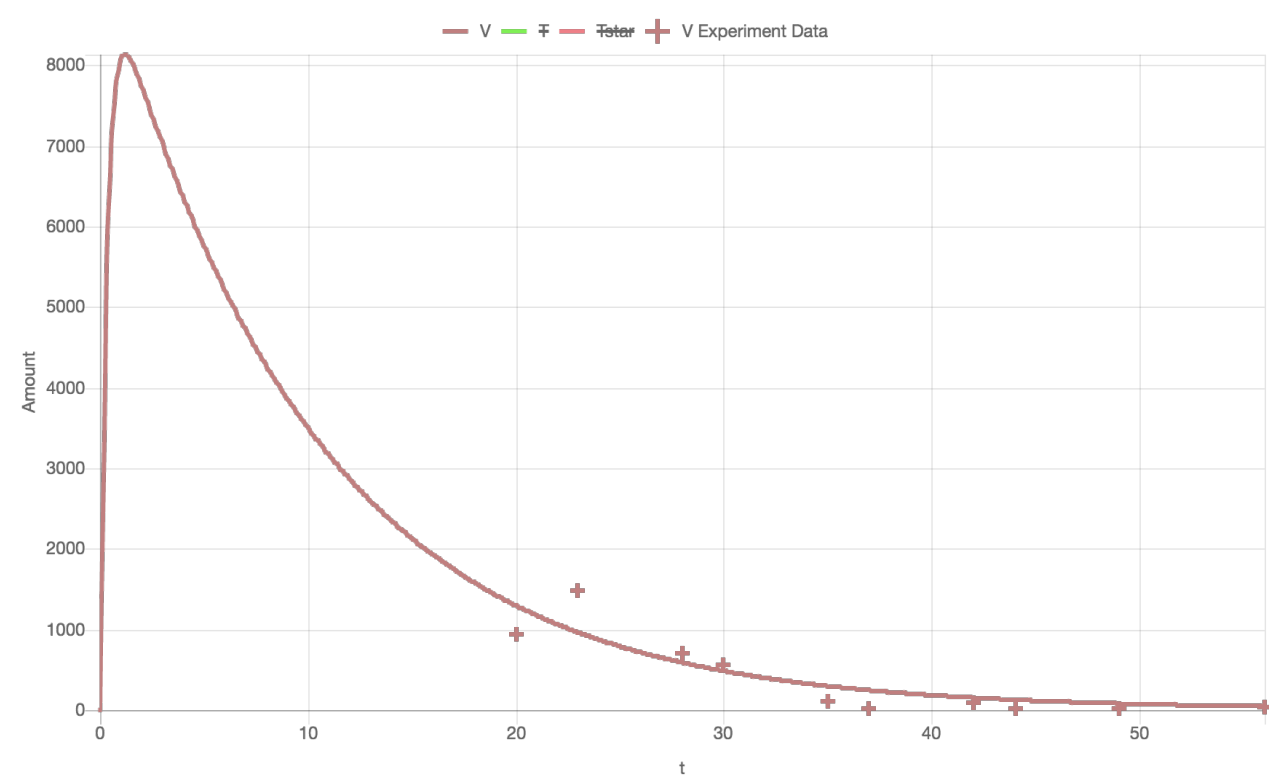

SBMLWebApp Results

# Reproduction of the analysis (Parameter Estimation) : For Patient 7 (pt7)

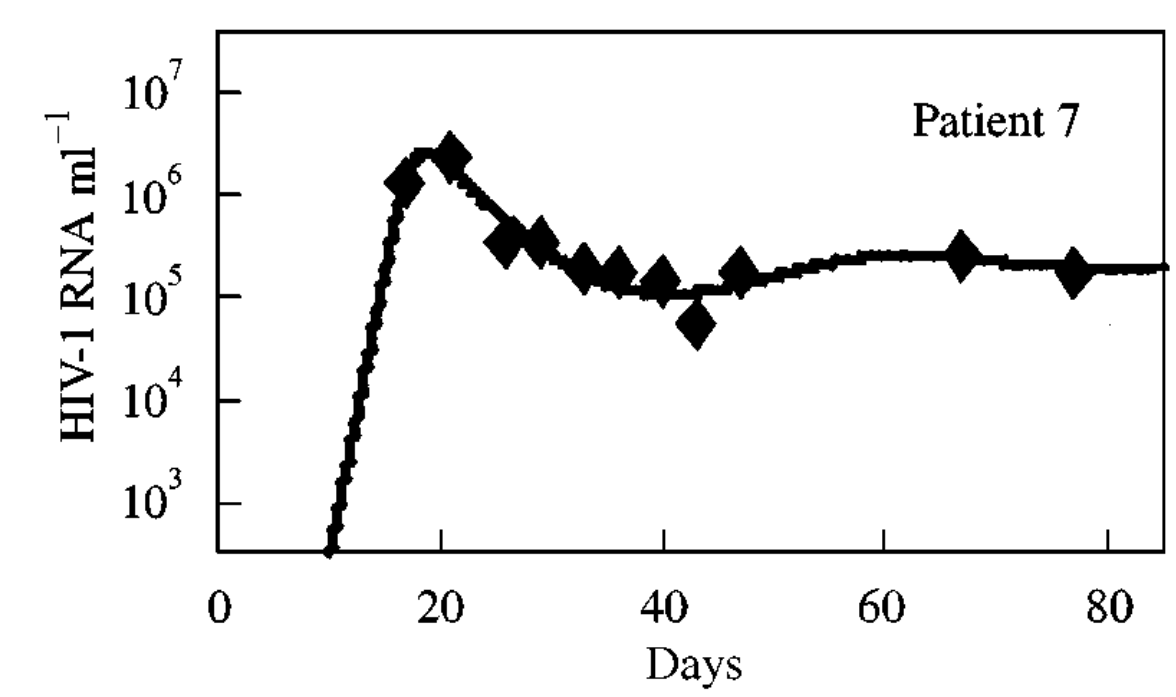

Perelson Result

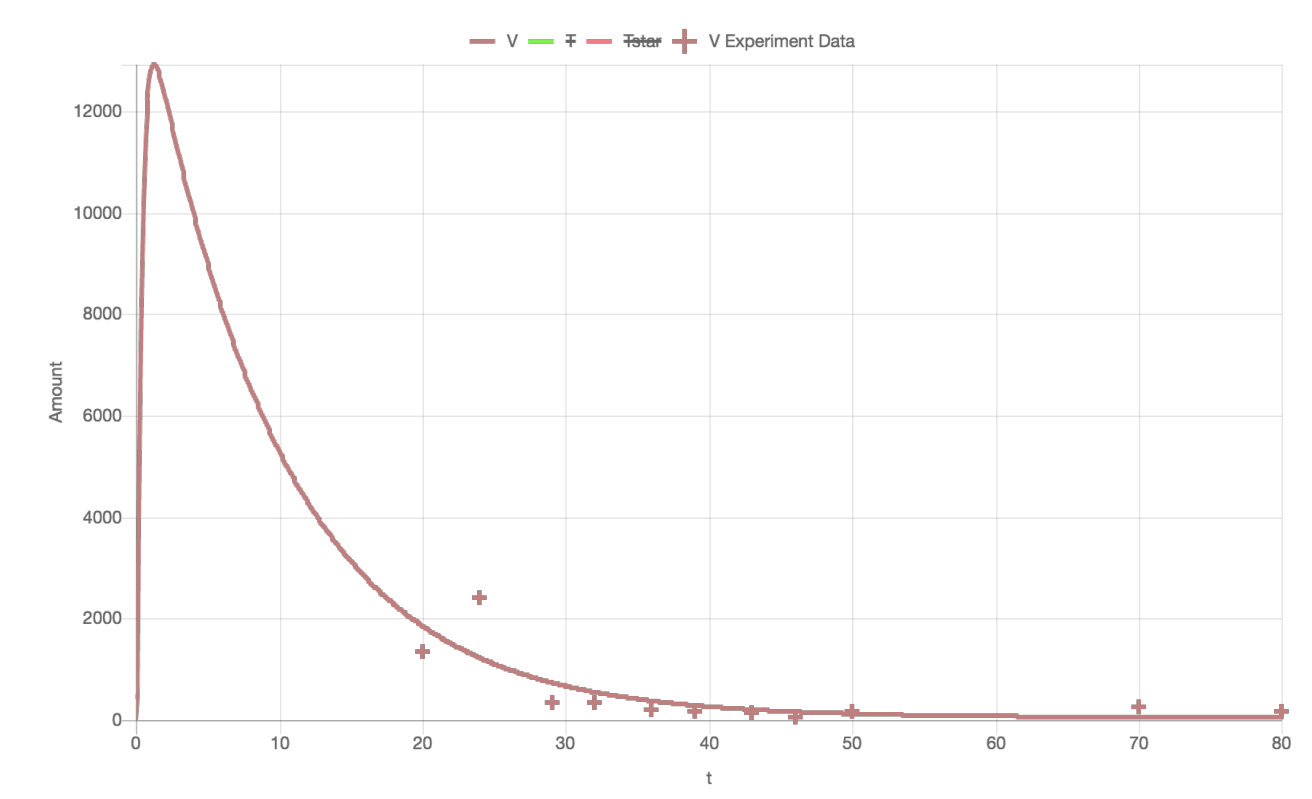

SBMLWebApp Results

# Reproduction of the analysis (Parameter Estimation) : For Patient 8 (pt8)

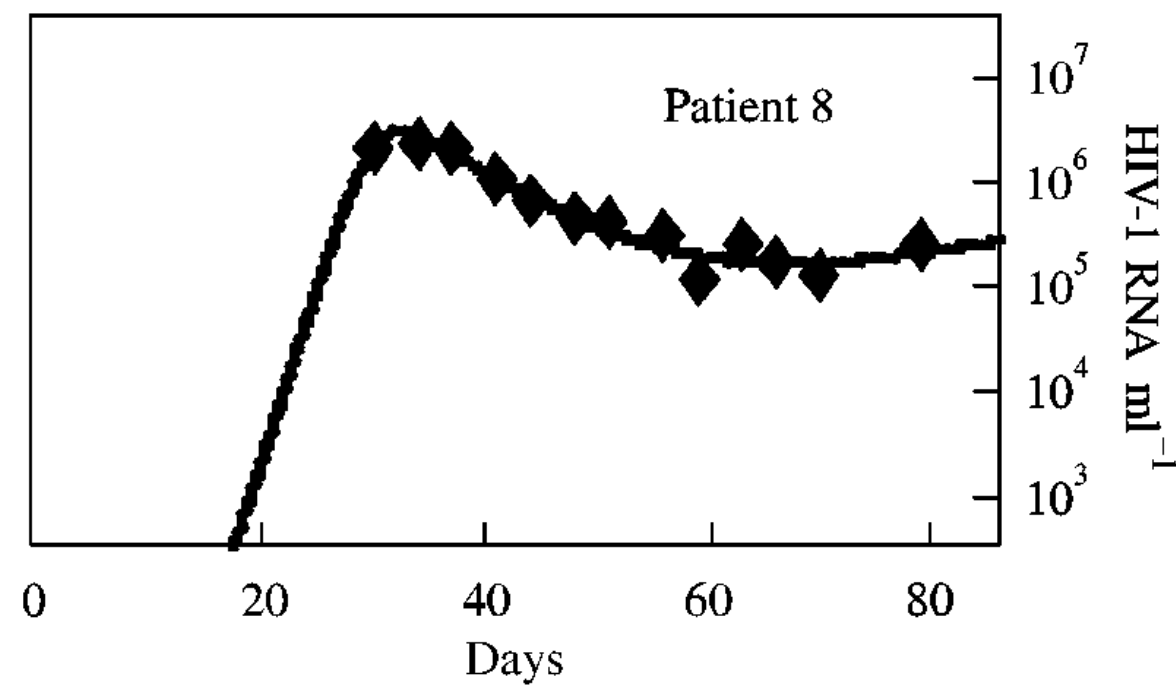

Perelson Result

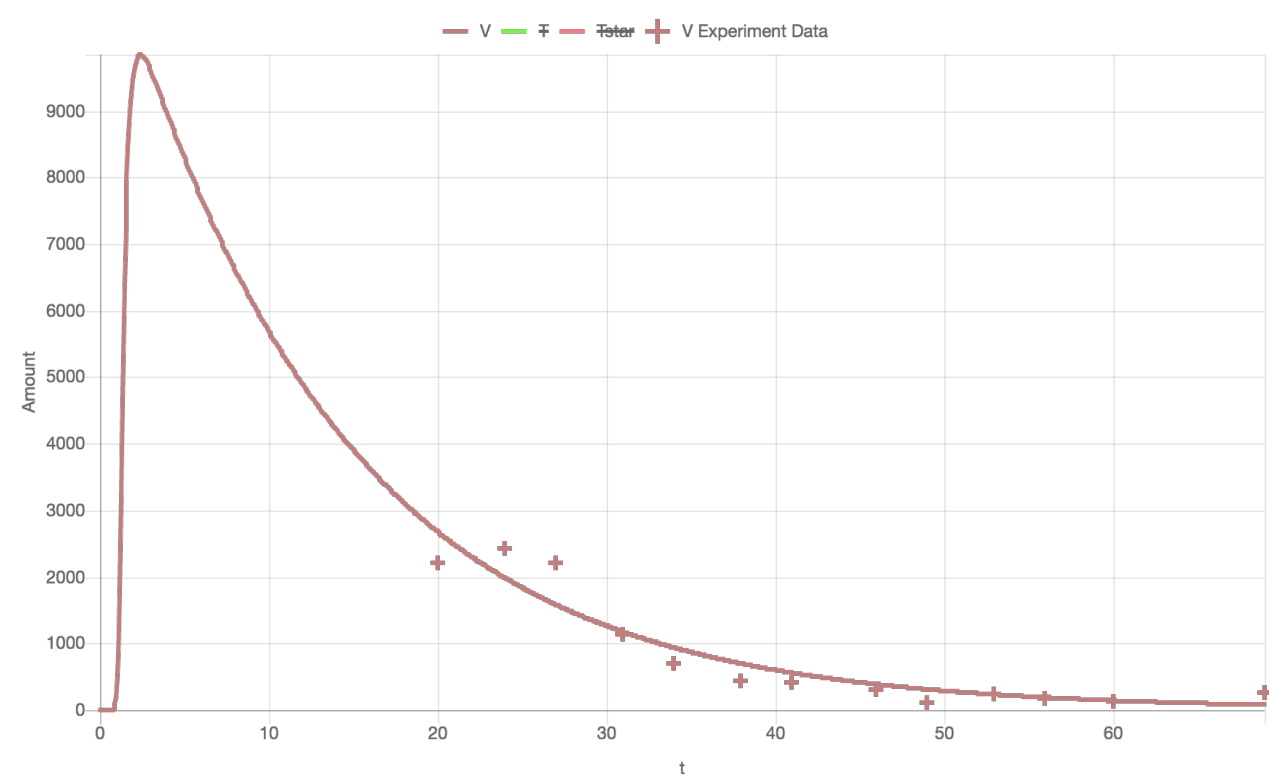

SBMLWebApp Results

# Reproduction of the analysis (Parameter Estimation) : For Patient 9 (pt9)

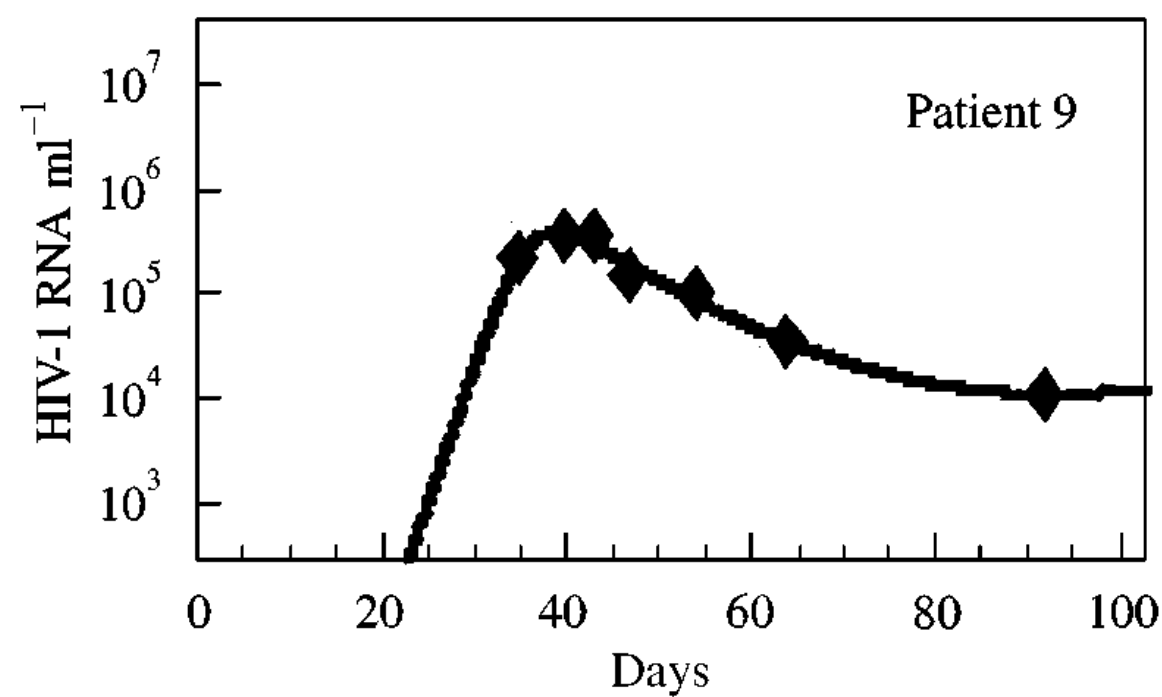

Perelson Result

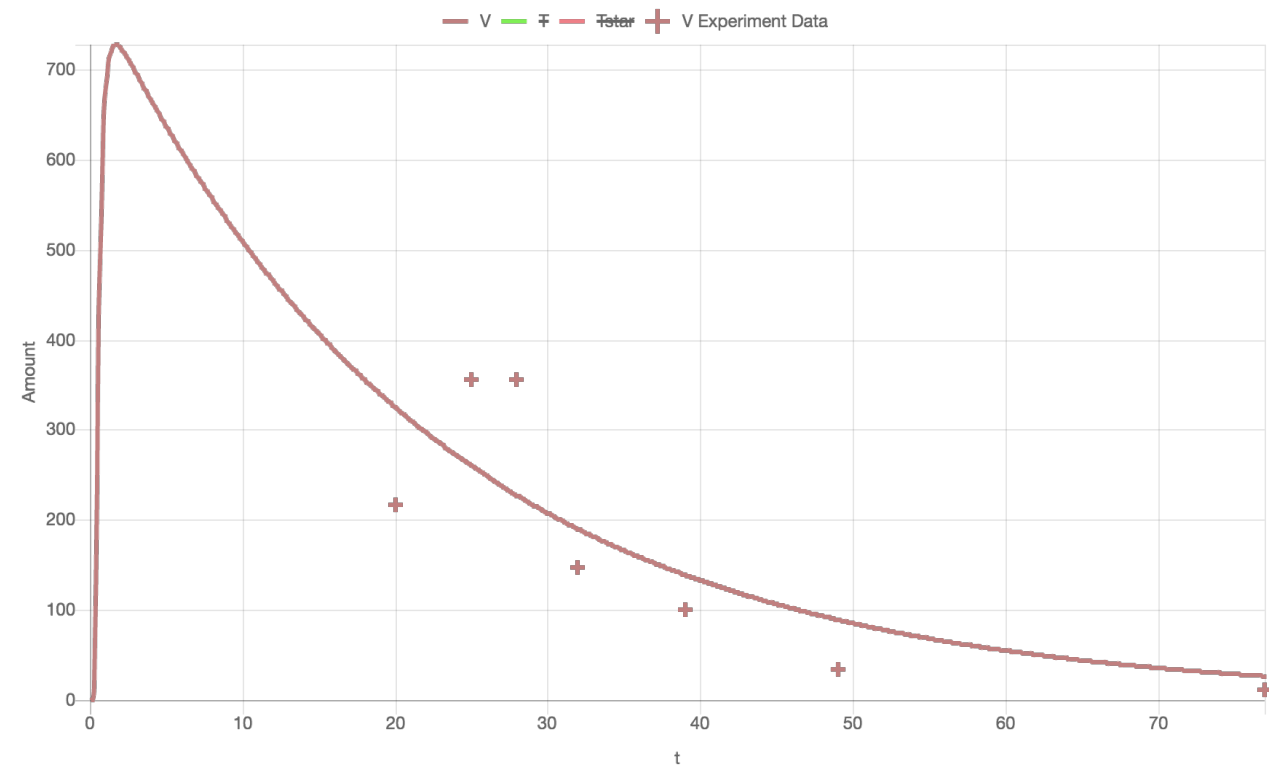

SBMLWebApp Results



# Reproduction of the analysis (Parameter Estimation) : For Patient 10 (pt10)

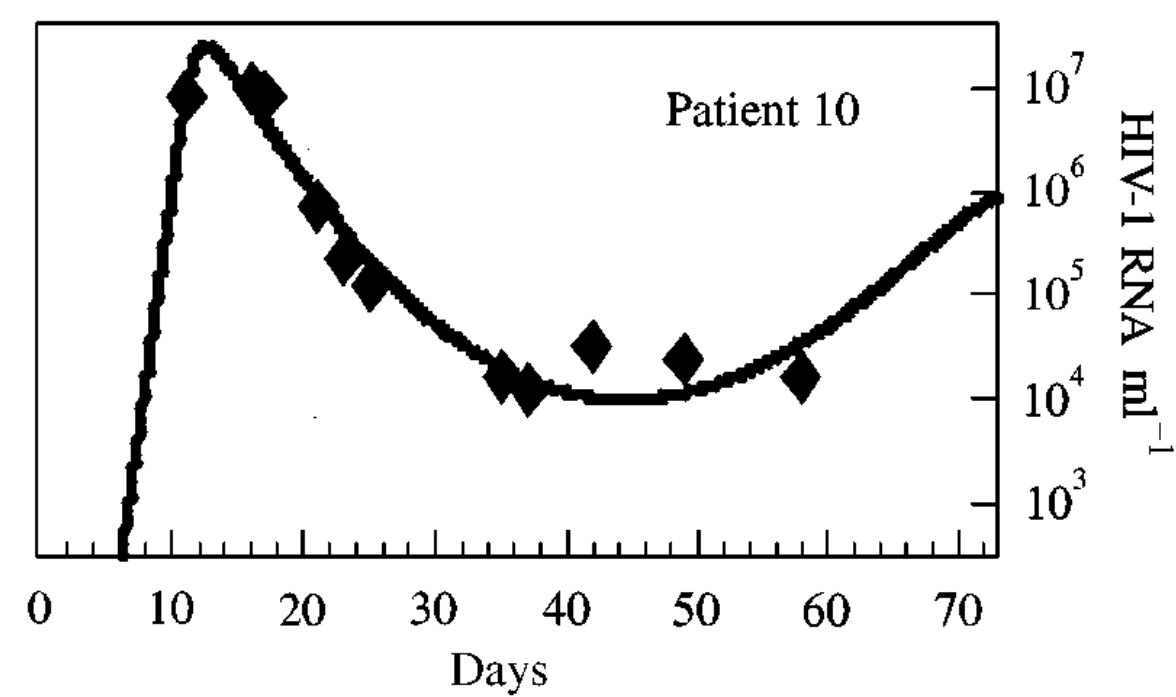

Perelson Result

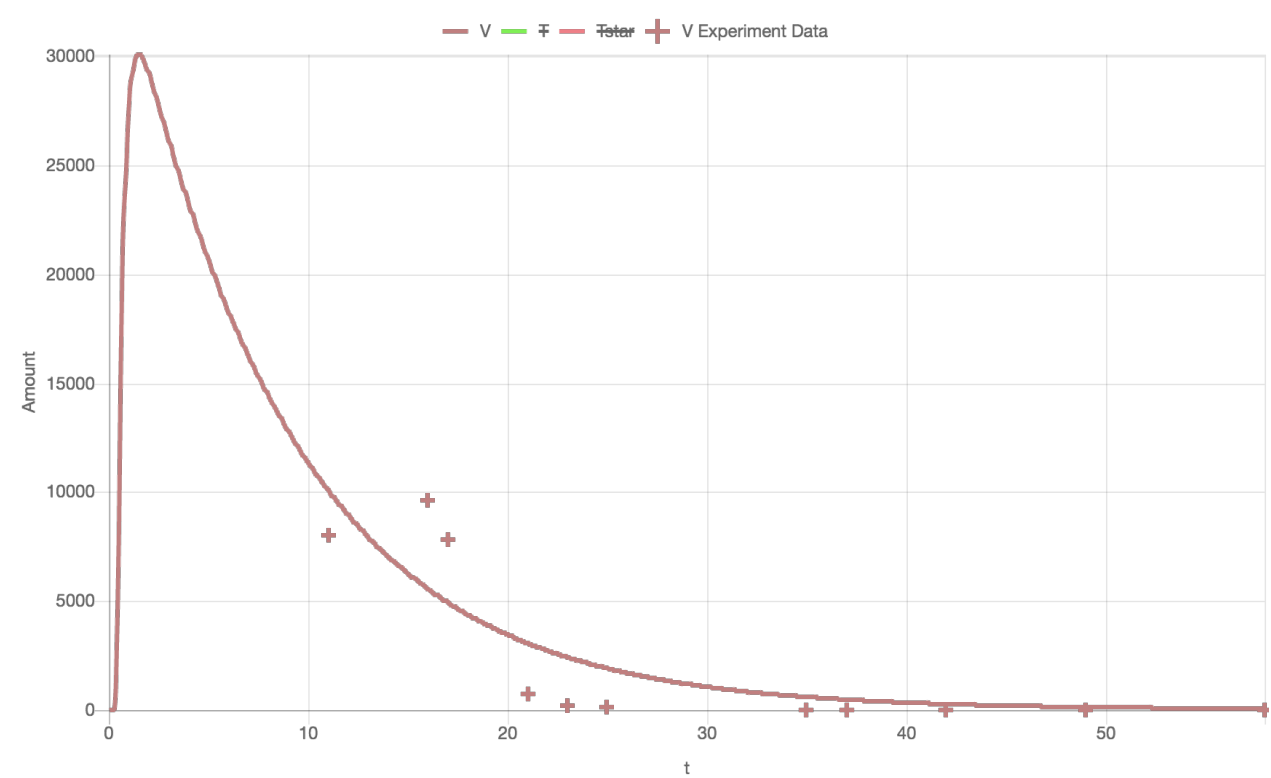

SBMLWebApp Results
