# Supplementary material
Source: MDPI journal article supplement (https://www.mdpi.com/2227-9717/9/10/1830)
Supplement: s1 [file s1]

Archive with 4 entries (4 files):
- S1-S8 supplement_sbmlwebapp.pdf
- S10 PerelsonModel_CalibratedForReproductionOfFigure8.xml
- S11 Perelson2000Model_ForParameterEstimation.xml
- S9 ReproductionSummary.pdf
