# Supplementary material
Source: MDPI journal article supplement (https://www.mdpi.com/2227-9717/9/10/1830)
Supplement: s1 [file s1 › S10 PerelsonModel_CalibratedForReproductionOfFigure8.xml]

<?xml version="1.0" encoding="UTF-8"?>
<sbml xmlns="http://www.sbml.org/sbml/level2/version4" xmlns:celldesigner="http://www.sbml.org/2001/ns/celldesigner" level="2" version="4">
<model metaid="PerelsonModel" id="PerelsonModel">
<annotation>
<celldesigner:extension>
<celldesigner:modelVersion>4.0</celldesigner:modelVersion>
<celldesigner:modelDisplay sizeX="656" sizeY="560"/>
<celldesigner:listOfCompartmentAliases/>
<celldesigner:listOfComplexSpeciesAliases/>
<celldesigner:listOfSpeciesAliases>
<celldesigner:speciesAlias id="sa1" species="T">
<celldesigner:activity>inactive</celldesigner:activity>
<celldesigner:bounds x="151.0" y="85.0" w="80.0" h="40.0"/>
<celldesigner:font size="12"/>
<celldesigner:view state="usual"/>
<celldesigner:usualView>
<celldesigner:innerPosition x="0.0" y="0.0"/>
<celldesigner:boxSize width="80.0" height="40.0"/>
<celldesigner:singleLine width="1.0"/>
<celldesigner:paint color="ffccffcc" scheme="Color"/>
</celldesigner:usualView>
<celldesigner:briefView>
<celldesigner:innerPosition x="0.0" y="0.0"/>
<celldesigner:boxSize width="80.0" height="60.0"/>
<celldesigner:singleLine width="0.0"/>
<celldesigner:paint color="3fff0000" scheme="Color"/>
</celldesigner:briefView>
<celldesigner:info state="empty" angle="-1.5707963267948966"/>
</celldesigner:speciesAlias>
<celldesigner:speciesAlias id="sa2" species="Tstar">
<celldesigner:activity>inactive</celldesigner:activity>
<celldesigner:bounds x="221.0" y="315.0" w="80.0" h="40.0"/>
<celldesigner:font size="12"/>
<celldesigner:view state="usual"/>
<celldesigner:usualView>
<celldesigner:innerPosition x="0.0" y="0.0"/>
<celldesigner:boxSize width="80.0" height="40.0"/>
<celldesigner:singleLine width="1.0"/>
<celldesigner:paint color="ffccffcc" scheme="Color"/>
</celldesigner:usualView>
<celldesigner:briefView>
<celldesigner:innerPosition x="0.0" y="0.0"/>
<celldesigner:boxSize width="80.0" height="60.0"/>
<celldesigner:singleLine width="0.0"/>
<celldesigner:paint color="3fff0000" scheme="Color"/>
</celldesigner:briefView>
<celldesigner:info state="empty" angle="-1.5707963267948966"/>
</celldesigner:speciesAlias>
<celldesigner:speciesAlias id="sa3" species="Tstarstar">
<celldesigner:activity>inactive</celldesigner:activity>
<celldesigner:bounds x="331.0" y="365.0" w="80.0" h="40.0"/>
<celldesigner:font size="12"/>
<celldesigner:view state="usual"/>
<celldesigner:usualView>
<celldesigner:innerPosition x="0.0" y="0.0"/>
<celldesigner:boxSize width="80.0" height="40.0"/>
<celldesigner:singleLine width="1.0"/>
<celldesigner:paint color="ffccffcc" scheme="Color"/>
</celldesigner:usualView>
<celldesigner:briefView>
<celldesigner:innerPosition x="0.0" y="0.0"/>
<celldesigner:boxSize width="80.0" height="60.0"/>
<celldesigner:singleLine width="0.0"/>
<celldesigner:paint color="3fff0000" scheme="Color"/>
</celldesigner:briefView>
<celldesigner:info state="empty" angle="-1.5707963267948966"/>
</celldesigner:speciesAlias>
<celldesigner:speciesAlias id="sa4" species="V">
<celldesigner:activity>inactive</celldesigner:activity>
<celldesigner:bounds x="421.0" y="35.0" w="80.0" h="40.0"/>
<celldesigner:font size="12"/>
<celldesigner:view state="usual"/>
<celldesigner:usualView>
<celldesigner:innerPosition x="0.0" y="0.0"/>
<celldesigner:boxSize width="80.0" height="40.0"/>
<celldesigner:singleLine width="1.0"/>
<celldesigner:paint color="ffccffcc" scheme="Color"/>
</celldesigner:usualView>
<celldesigner:briefView>
<celldesigner:innerPosition x="0.0" y="0.0"/>
<celldesigner:boxSize width="80.0" height="60.0"/>
<celldesigner:singleLine width="0.0"/>
<celldesigner:paint color="3fff0000" scheme="Color"/>
</celldesigner:briefView>
<celldesigner:info state="empty" angle="-1.5707963267948966"/>
</celldesigner:speciesAlias>
<celldesigner:speciesAlias id="sa5" species="s5">
<celldesigner:activity>inactive</celldesigner:activity>
<celldesigner:bounds x="176.0" y="250.0" w="30.0" h="30.0"/>
<celldesigner:font size="12"/>
<celldesigner:view state="usual"/>
<celldesigner:usualView>
<celldesigner:innerPosition x="0.0" y="0.0"/>
<celldesigner:boxSize width="30.0" height="30.0"/>
<celldesigner:singleLine width="1.0"/>
<celldesigner:paint color="ffffcccc" scheme="Color"/>
</celldesigner:usualView>
<celldesigner:briefView>
<celldesigner:innerPosition x="0.0" y="0.0"/>
<celldesigner:boxSize width="80.0" height="60.0"/>
<celldesigner:singleLine width="0.0"/>
<celldesigner:paint color="3fff0000" scheme="Color"/>
</celldesigner:briefView>
<celldesigner:info state="empty" angle="-1.5707963267948966"/>
</celldesigner:speciesAlias>
<celldesigner:speciesAlias id="sa6" species="s6">
<celldesigner:activity>inactive</celldesigner:activity>
<celldesigner:bounds x="56.0" y="90.0" w="30.0" h="30.0"/>
<celldesigner:font size="12"/>
<celldesigner:view state="usual"/>
<celldesigner:usualView>
<celldesigner:innerPosition x="0.0" y="0.0"/>
<celldesigner:boxSize width="30.0" height="30.0"/>
<celldesigner:singleLine width="1.0"/>
<celldesigner:paint color="ffffcccc" scheme="Color"/>
</celldesigner:usualView>
<celldesigner:briefView>
<celldesigner:innerPosition x="0.0" y="0.0"/>
<celldesigner:boxSize width="80.0" height="60.0"/>
<celldesigner:singleLine width="0.0"/>
<celldesigner:paint color="3fff0000" scheme="Color"/>
</celldesigner:briefView>
<celldesigner:info state="empty" angle="-1.5707963267948966"/>
</celldesigner:speciesAlias>
<celldesigner:speciesAlias id="sa7" species="s7">
<celldesigner:activity>inactive</celldesigner:activity>
<celldesigner:bounds x="246.0" y="220.0" w="30.0" h="30.0"/>
<celldesigner:font size="12"/>
<celldesigner:view state="usual"/>
<celldesigner:usualView>
<celldesigner:innerPosition x="0.0" y="0.0"/>
<celldesigner:boxSize width="30.0" height="30.0"/>
<celldesigner:singleLine width="1.0"/>
<celldesigner:paint color="ffffcccc" scheme="Color"/>
</celldesigner:usualView>
<celldesigner:briefView>
<celldesigner:innerPosition x="0.0" y="0.0"/>
<celldesigner:boxSize width="80.0" height="60.0"/>
<celldesigner:singleLine width="0.0"/>
<celldesigner:paint color="3fff0000" scheme="Color"/>
</celldesigner:briefView>
<celldesigner:info state="empty" angle="-1.5707963267948966"/>
</celldesigner:speciesAlias>
<celldesigner:speciesAlias id="sa8" species="s8">
<celldesigner:activity>inactive</celldesigner:activity>
<celldesigner:bounds x="356.0" y="470.0" w="30.0" h="30.0"/>
<celldesigner:font size="12"/>
<celldesigner:view state="usual"/>
<celldesigner:usualView>
<celldesigner:innerPosition x="0.0" y="0.0"/>
<celldesigner:boxSize width="30.0" height="30.0"/>
<celldesigner:singleLine width="1.0"/>
<celldesigner:paint color="ffffcccc" scheme="Color"/>
</celldesigner:usualView>
<celldesigner:briefView>
<celldesigner:innerPosition x="0.0" y="0.0"/>
<celldesigner:boxSize width="80.0" height="60.0"/>
<celldesigner:singleLine width="0.0"/>
<celldesigner:paint color="3fff0000" scheme="Color"/>
</celldesigner:briefView>
<celldesigner:info state="empty" angle="-1.5707963267948966"/>
</celldesigner:speciesAlias>
<celldesigner:speciesAlias id="sa9" species="s9">
<celldesigner:activity>inactive</celldesigner:activity>
<celldesigner:bounds x="446.0" y="420.0" w="30.0" h="30.0"/>
<celldesigner:font size="12"/>
<celldesigner:view state="usual"/>
<celldesigner:usualView>
<celldesigner:innerPosition x="0.0" y="0.0"/>
<celldesigner:boxSize width="30.0" height="30.0"/>
<celldesigner:singleLine width="1.0"/>
<celldesigner:paint color="ffffcccc" scheme="Color"/>
</celldesigner:usualView>
<celldesigner:briefView>
<celldesigner:innerPosition x="0.0" y="0.0"/>
<celldesigner:boxSize width="80.0" height="60.0"/>
<celldesigner:singleLine width="0.0"/>
<celldesigner:paint color="3fff0000" scheme="Color"/>
</celldesigner:briefView>
<celldesigner:info state="empty" angle="-1.5707963267948966"/>
</celldesigner:speciesAlias>
<celldesigner:speciesAlias id="sa10" species="s10">
<celldesigner:activity>inactive</celldesigner:activity>
<celldesigner:bounds x="566.0" y="40.0" w="30.0" h="30.0"/>
<celldesigner:font size="12"/>
<celldesigner:view state="usual"/>
<celldesigner:usualView>
<celldesigner:innerPosition x="0.0" y="0.0"/>
<celldesigner:boxSize width="30.0" height="30.0"/>
<celldesigner:singleLine width="1.0"/>
<celldesigner:paint color="ffffcccc" scheme="Color"/>
</celldesigner:usualView>
<celldesigner:briefView>
<celldesigner:innerPosition x="0.0" y="0.0"/>
<celldesigner:boxSize width="80.0" height="60.0"/>
<celldesigner:singleLine width="0.0"/>
<celldesigner:paint color="3fff0000" scheme="Color"/>
</celldesigner:briefView>
<celldesigner:info state="empty" angle="-1.5707963267948966"/>
</celldesigner:speciesAlias>
<celldesigner:speciesAlias id="sa11" species="s11">
<celldesigner:activity>inactive</celldesigner:activity>
<celldesigner:bounds x="356.0" y="130.0" w="30.0" h="30.0"/>
<celldesigner:font size="12"/>
<celldesigner:view state="usual"/>
<celldesigner:usualView>
<celldesigner:innerPosition x="0.0" y="0.0"/>
<celldesigner:boxSize width="30.0" height="30.0"/>
<celldesigner:singleLine width="1.0"/>
<celldesigner:paint color="ffffcccc" scheme="Color"/>
</celldesigner:usualView>
<celldesigner:briefView>
<celldesigner:innerPosition x="0.0" y="0.0"/>
<celldesigner:boxSize width="80.0" height="60.0"/>
<celldesigner:singleLine width="0.0"/>
<celldesigner:paint color="3fff0000" scheme="Color"/>
</celldesigner:briefView>
<celldesigner:info state="empty" angle="-1.5707963267948966"/>
</celldesigner:speciesAlias>
</celldesigner:listOfSpeciesAliases>
<celldesigner:listOfGroups/>
<celldesigner:listOfProteins>
<celldesigner:protein id="pr1" name="T" type="GENERIC"/>
<celldesigner:protein id="pr2" name="Tstar" type="GENERIC"/>
<celldesigner:protein id="pr3" name="Tstarstar" type="GENERIC"/>
<celldesigner:protein id="pr4" name="V" type="GENERIC"/>
</celldesigner:listOfProteins>
<celldesigner:listOfGenes/>
<celldesigner:listOfRNAs/>
<celldesigner:listOfAntisenseRNAs/>
<celldesigner:listOfLayers/>
<celldesigner:listOfBlockDiagrams/>
</celldesigner:extension>
</annotation>
<listOfUnitDefinitions>
<unitDefinition metaid="substance" id="substance" name="substance">
<listOfUnits>
<unit metaid="CDMT00035" kind="mole"/>
</listOfUnits>
</unitDefinition>
<unitDefinition metaid="volume" id="volume" name="volume">
<listOfUnits>
<unit metaid="CDMT00036" kind="litre"/>
</listOfUnits>
</unitDefinition>
<unitDefinition metaid="area" id="area" name="area">
<listOfUnits>
<unit metaid="CDMT00037" kind="metre" exponent="2"/>
</listOfUnits>
</unitDefinition>
<unitDefinition metaid="length" id="length" name="length">
<listOfUnits>
<unit metaid="CDMT00038" kind="metre"/>
</listOfUnits>
</unitDefinition>
<unitDefinition metaid="time" id="time" name="time">
<listOfUnits>
<unit metaid="CDMT00039" kind="second"/>
</listOfUnits>
</unitDefinition>
</listOfUnitDefinitions>
<listOfCompartments>
<compartment metaid="default" id="default" size="1" units="volume"/>
</listOfCompartments>
<listOfSpecies>
<species metaid="s11" id="s11" name="s11" compartment="default" initialAmount="0" hasOnlySubstanceUnits="true" boundaryCondition="true" charge="0" constant="true">
<annotation>
<celldesigner:extension>
<celldesigner:positionToCompartment>inside</celldesigner:positionToCompartment>
<celldesigner:speciesIdentity>
<celldesigner:class>DEGRADED</celldesigner:class>
<celldesigner:name>s11</celldesigner:name>
</celldesigner:speciesIdentity>
</celldesigner:extension>
</annotation>
</species>
<species metaid="s10" id="s10" name="s10" compartment="default" initialAmount="0" hasOnlySubstanceUnits="true" boundaryCondition="true" charge="0" constant="true">
<annotation>
<celldesigner:extension>
<celldesigner:positionToCompartment>inside</celldesigner:positionToCompartment>
<celldesigner:speciesIdentity>
<celldesigner:class>DEGRADED</celldesigner:class>
<celldesigner:name>s10</celldesigner:name>
</celldesigner:speciesIdentity>
</celldesigner:extension>
</annotation>
</species>
<species metaid="s9" id="s9" name="s9" compartment="default" initialAmount="0" hasOnlySubstanceUnits="true" boundaryCondition="true" charge="0" constant="true">
<annotation>
<celldesigner:extension>
<celldesigner:positionToCompartment>inside</celldesigner:positionToCompartment>
<celldesigner:speciesIdentity>
<celldesigner:class>DEGRADED</celldesigner:class>
<celldesigner:name>s9</celldesigner:name>
</celldesigner:speciesIdentity>
</celldesigner:extension>
</annotation>
</species>
<species metaid="s8" id="s8" name="s8" compartment="default" initialAmount="0" hasOnlySubstanceUnits="true" boundaryCondition="true" charge="0" constant="true">
<annotation>
<celldesigner:extension>
<celldesigner:positionToCompartment>inside</celldesigner:positionToCompartment>
<celldesigner:speciesIdentity>
<celldesigner:class>DEGRADED</celldesigner:class>
<celldesigner:name>s8</celldesigner:name>
</celldesigner:speciesIdentity>
</celldesigner:extension>
</annotation>
</species>
<species metaid="s7" id="s7" name="s7" compartment="default" initialAmount="0" hasOnlySubstanceUnits="true" boundaryCondition="true" charge="0" constant="true">
<annotation>
<celldesigner:extension>
<celldesigner:positionToCompartment>inside</celldesigner:positionToCompartment>
<celldesigner:speciesIdentity>
<celldesigner:class>DEGRADED</celldesigner:class>
<celldesigner:name>s7</celldesigner:name>
</celldesigner:speciesIdentity>
</celldesigner:extension>
</annotation>
</species>
<species metaid="s6" id="s6" name="s6" compartment="default" initialAmount="0" hasOnlySubstanceUnits="true" boundaryCondition="true" charge="0" constant="true">
<annotation>
<celldesigner:extension>
<celldesigner:positionToCompartment>inside</celldesigner:positionToCompartment>
<celldesigner:speciesIdentity>
<celldesigner:class>DEGRADED</celldesigner:class>
<celldesigner:name>s6</celldesigner:name>
</celldesigner:speciesIdentity>
</celldesigner:extension>
</annotation>
</species>
<species metaid="s5" id="s5" name="s5" compartment="default" initialAmount="0" hasOnlySubstanceUnits="true" boundaryCondition="true" charge="0" constant="true">
<annotation>
<celldesigner:extension>
<celldesigner:positionToCompartment>inside</celldesigner:positionToCompartment>
<celldesigner:speciesIdentity>
<celldesigner:class>DEGRADED</celldesigner:class>
<celldesigner:name>s5</celldesigner:name>
</celldesigner:speciesIdentity>
</celldesigner:extension>
</annotation>
</species>
<species metaid="V" id="V" name="V" compartment="default" initialAmount="0.001" hasOnlySubstanceUnits="true" charge="0">
<annotation>
<celldesigner:extension>
<celldesigner:positionToCompartment>inside</celldesigner:positionToCompartment>
<celldesigner:speciesIdentity>
<celldesigner:class>PROTEIN</celldesigner:class>
<celldesigner:proteinReference>pr4</celldesigner:proteinReference>
</celldesigner:speciesIdentity>
</celldesigner:extension>
</annotation>
</species>
<species metaid="Tstarstar" id="Tstarstar" name="Tstarstar" compartment="default" initialAmount="0">
<annotation>
<celldesigner:extension>
<celldesigner:positionToCompartment>inside</celldesigner:positionToCompartment>
<celldesigner:speciesIdentity>
<celldesigner:class>PROTEIN</celldesigner:class>
<celldesigner:proteinReference>pr3</celldesigner:proteinReference>
</celldesigner:speciesIdentity>
<celldesigner:listOfCatalyzedReactions>
<celldesigner:catalyzed reaction="re8"/>
<celldesigner:catalyzed reaction="re12"/>
</celldesigner:listOfCatalyzedReactions>
</celldesigner:extension>
</annotation>
</species>
<species metaid="Tstar" id="Tstar" name="Tstar" compartment="default" initialAmount="0">
<annotation>
<celldesigner:extension>
<celldesigner:positionToCompartment>inside</celldesigner:positionToCompartment>
<celldesigner:speciesIdentity>
<celldesigner:class>PROTEIN</celldesigner:class>
<celldesigner:proteinReference>pr2</celldesigner:proteinReference>
</celldesigner:speciesIdentity>
<celldesigner:listOfCatalyzedReactions>
<celldesigner:catalyzed reaction="re12"/>
</celldesigner:listOfCatalyzedReactions>
</celldesigner:extension>
</annotation>
</species>
<species metaid="T" id="T" name="T" compartment="default" initialAmount="1000" hasOnlySubstanceUnits="true" charge="0">
<annotation>
<celldesigner:extension>
<celldesigner:positionToCompartment>inside</celldesigner:positionToCompartment>
<celldesigner:speciesIdentity>
<celldesigner:class>PROTEIN</celldesigner:class>
<celldesigner:proteinReference>pr1</celldesigner:proteinReference>
</celldesigner:speciesIdentity>
<celldesigner:listOfCatalyzedReactions>
<celldesigner:catalyzed reaction="re12"/>
</celldesigner:listOfCatalyzedReactions>
</celldesigner:extension>
</annotation>
</species>
</listOfSpecies>
<listOfReactions>
<reaction metaid="re1" id="re1" reversible="false" fast="false">
<annotation>
<celldesigner:extension>
<celldesigner:reactionType>STATE_TRANSITION</celldesigner:reactionType>
<celldesigner:baseReactants>
<celldesigner:baseReactant species="s5" alias="sa5">
<celldesigner:linkAnchor position="N"/>
</celldesigner:baseReactant>
</celldesigner:baseReactants>
<celldesigner:baseProducts>
<celldesigner:baseProduct species="T" alias="sa1">
<celldesigner:linkAnchor position="S"/>
</celldesigner:baseProduct>
</celldesigner:baseProducts>
<celldesigner:connectScheme connectPolicy="direct" rectangleIndex="1">
<celldesigner:listOfLineDirection>
<celldesigner:lineDirection index="0" value="unknown"/>
<celldesigner:lineDirection index="1" value="unknown"/>
<celldesigner:lineDirection index="2" value="unknown"/>
</celldesigner:listOfLineDirection>
</celldesigner:connectScheme>
<celldesigner:editPoints>0.2615384615384604,0.0 0.3538461538461528,0.0</celldesigner:editPoints>
<celldesigner:line width="1.0" color="ff000000"/>
</celldesigner:extension>
</annotation>
<listOfReactants>
<speciesReference metaid="CDMT00001" species="s5">
<annotation>
<celldesigner:extension>
<celldesigner:alias>sa5</celldesigner:alias>
</celldesigner:extension>
</annotation>
</speciesReference>
</listOfReactants>
<listOfProducts>
<speciesReference metaid="CDMT00002" species="T">
<annotation>
<celldesigner:extension>
<celldesigner:alias>sa1</celldesigner:alias>
</celldesigner:extension>
</annotation>
</speciesReference>
</listOfProducts>
<kineticLaw metaid="CDMT00003">
<math xmlns="http://www.w3.org/1998/Math/MathML">
<ci> s </ci>
</math>
<listOfParameters>
<parameter metaid="s" id="s" value="10" units="substance"/>
</listOfParameters>
</kineticLaw>
</reaction>
<reaction metaid="re3" id="re3" reversible="false" fast="false">
<annotation>
<celldesigner:extension>
<celldesigner:reactionType>STATE_TRANSITION</celldesigner:reactionType>
<celldesigner:baseReactants>
<celldesigner:baseReactant species="T" alias="sa1">
<celldesigner:linkAnchor position="W"/>
</celldesigner:baseReactant>
</celldesigner:baseReactants>
<celldesigner:baseProducts>
<celldesigner:baseProduct species="s6" alias="sa6">
<celldesigner:linkAnchor position="E"/>
</celldesigner:baseProduct>
</celldesigner:baseProducts>
<celldesigner:connectScheme connectPolicy="direct" rectangleIndex="1">
<celldesigner:listOfLineDirection>
<celldesigner:lineDirection index="0" value="unknown"/>
<celldesigner:lineDirection index="1" value="unknown"/>
<celldesigner:lineDirection index="2" value="unknown"/>
</celldesigner:listOfLineDirection>
</celldesigner:connectScheme>
<celldesigner:editPoints>0.34285714285714275,0.0 0.5142857142857142,0.0</celldesigner:editPoints>
<celldesigner:line width="1.0" color="ff000000"/>
</celldesigner:extension>
</annotation>
<listOfReactants>
<speciesReference metaid="CDMT00004" species="T">
<annotation>
<celldesigner:extension>
<celldesigner:alias>sa1</celldesigner:alias>
</celldesigner:extension>
</annotation>
</speciesReference>
</listOfReactants>
<listOfProducts>
<speciesReference metaid="CDMT00005" species="s6">
<annotation>
<celldesigner:extension>
<celldesigner:alias>sa6</celldesigner:alias>
</celldesigner:extension>
</annotation>
</speciesReference>
</listOfProducts>
<kineticLaw metaid="CDMT00006">
<math xmlns="http://www.w3.org/1998/Math/MathML">
<apply>
<times/>
<ci> mu_T </ci>
<ci> T </ci>
</apply>
</math>
<listOfParameters>
<parameter metaid="mu_T" id="mu_T" value="0.06" units="substance"/>
</listOfParameters>
</kineticLaw>
</reaction>
<reaction metaid="re5" id="re5" reversible="false" fast="false">
<annotation>
<celldesigner:extension>
<celldesigner:reactionType>STATE_TRANSITION</celldesigner:reactionType>
<celldesigner:baseReactants>
<celldesigner:baseReactant species="Tstar" alias="sa2">
<celldesigner:linkAnchor position="N"/>
</celldesigner:baseReactant>
</celldesigner:baseReactants>
<celldesigner:baseProducts>
<celldesigner:baseProduct species="s7" alias="sa7">
<celldesigner:linkAnchor position="S"/>
</celldesigner:baseProduct>
</celldesigner:baseProducts>
<celldesigner:connectScheme connectPolicy="direct" rectangleIndex="1">
<celldesigner:listOfLineDirection>
<celldesigner:lineDirection index="0" value="unknown"/>
<celldesigner:lineDirection index="1" value="unknown"/>
<celldesigner:lineDirection index="2" value="unknown"/>
</celldesigner:listOfLineDirection>
</celldesigner:connectScheme>
<celldesigner:editPoints>0.3428571428571434,0.0 0.5142857142857142,0.0</celldesigner:editPoints>
<celldesigner:line width="1.0" color="ff000000"/>
</celldesigner:extension>
</annotation>
<listOfReactants>
<speciesReference metaid="CDMT00007" species="Tstar">
<annotation>
<celldesigner:extension>
<celldesigner:alias>sa2</celldesigner:alias>
</celldesigner:extension>
</annotation>
</speciesReference>
</listOfReactants>
<listOfProducts>
<speciesReference metaid="CDMT00008" species="s7">
<annotation>
<celldesigner:extension>
<celldesigner:alias>sa7</celldesigner:alias>
</celldesigner:extension>
</annotation>
</speciesReference>
</listOfProducts>
<kineticLaw metaid="CDMT00009">
<math xmlns="http://www.w3.org/1998/Math/MathML">
<apply>
<times/>
<ci> mu_T </ci>
<ci> Tstar </ci>
</apply>
</math>
<listOfParameters>
<parameter metaid="CDMT00010" id="mu_T" value="0.06" units="substance"/>
</listOfParameters>
</kineticLaw>
</reaction>
<reaction metaid="re6" id="re6" reversible="false" fast="false">
<annotation>
<celldesigner:extension>
<celldesigner:reactionType>STATE_TRANSITION</celldesigner:reactionType>
<celldesigner:baseReactants>
<celldesigner:baseReactant species="Tstar" alias="sa2">
<celldesigner:linkAnchor position="S"/>
</celldesigner:baseReactant>
</celldesigner:baseReactants>
<celldesigner:baseProducts>
<celldesigner:baseProduct species="Tstarstar" alias="sa3">
<celldesigner:linkAnchor position="W"/>
</celldesigner:baseProduct>
</celldesigner:baseProducts>
<celldesigner:connectScheme connectPolicy="direct" rectangleIndex="1">
<celldesigner:listOfLineDirection>
<celldesigner:lineDirection index="0" value="unknown"/>
<celldesigner:lineDirection index="1" value="unknown"/>
<celldesigner:lineDirection index="2" value="unknown"/>
</celldesigner:listOfLineDirection>
</celldesigner:connectScheme>
<celldesigner:editPoints>0.12413793103448256,0.28965517241379324 0.22758620689655196,0.33103448275862135</celldesigner:editPoints>
<celldesigner:line width="1.0" color="ff000000"/>
</celldesigner:extension>
</annotation>
<listOfReactants>
<speciesReference metaid="CDMT00011" species="Tstar">
<annotation>
<celldesigner:extension>
<celldesigner:alias>sa2</celldesigner:alias>
</celldesigner:extension>
</annotation>
</speciesReference>
</listOfReactants>
<listOfProducts>
<speciesReference metaid="CDMT00012" species="Tstarstar">
<annotation>
<celldesigner:extension>
<celldesigner:alias>sa3</celldesigner:alias>
</celldesigner:extension>
</annotation>
</speciesReference>
</listOfProducts>
<kineticLaw metaid="CDMT00013">
<math xmlns="http://www.w3.org/1998/Math/MathML">
<apply>
<times/>
<ci> k2 </ci>
<ci> Tstar </ci>
</apply>
</math>
<listOfParameters>
<parameter metaid="k2" id="k2" value="0.00012" units="substance"/>
</listOfParameters>
</kineticLaw>
</reaction>
<reaction metaid="re7" id="re7" reversible="false" fast="false">
<annotation>
<celldesigner:extension>
<celldesigner:reactionType>STATE_TRANSITION</celldesigner:reactionType>
<celldesigner:baseReactants>
<celldesigner:baseReactant species="Tstarstar" alias="sa3">
<celldesigner:linkAnchor position="S"/>
</celldesigner:baseReactant>
</celldesigner:baseReactants>
<celldesigner:baseProducts>
<celldesigner:baseProduct species="s8" alias="sa8">
<celldesigner:linkAnchor position="N"/>
</celldesigner:baseProduct>
</celldesigner:baseProducts>
<celldesigner:connectScheme connectPolicy="direct" rectangleIndex="1">
<celldesigner:listOfLineDirection>
<celldesigner:lineDirection index="0" value="unknown"/>
<celldesigner:lineDirection index="1" value="unknown"/>
<celldesigner:lineDirection index="2" value="unknown"/>
</celldesigner:listOfLineDirection>
</celldesigner:connectScheme>
<celldesigner:editPoints>0.3428571428571425,0.0 0.5142857142857142,0.0</celldesigner:editPoints>
<celldesigner:line width="1.0" color="ff000000"/>
</celldesigner:extension>
</annotation>
<listOfReactants>
<speciesReference metaid="CDMT00014" species="Tstarstar">
<annotation>
<celldesigner:extension>
<celldesigner:alias>sa3</celldesigner:alias>
</celldesigner:extension>
</annotation>
</speciesReference>
</listOfReactants>
<listOfProducts>
<speciesReference metaid="CDMT00015" species="s8">
<annotation>
<celldesigner:extension>
<celldesigner:alias>sa8</celldesigner:alias>
</celldesigner:extension>
</annotation>
</speciesReference>
</listOfProducts>
<kineticLaw metaid="CDMT00016">
<math xmlns="http://www.w3.org/1998/Math/MathML">
<apply>
<times/>
<ci> mu_b </ci>
<ci> Tstarstar </ci>
</apply>
</math>
<listOfParameters>
<parameter metaid="mu_b" id="mu_b" value="0.24" units="substance"/>
</listOfParameters>
</kineticLaw>
</reaction>
<reaction metaid="re8" id="re8" reversible="false" fast="false">
<annotation>
<celldesigner:extension>
<celldesigner:reactionType>STATE_TRANSITION</celldesigner:reactionType>
<celldesigner:baseReactants>
<celldesigner:baseReactant species="s9" alias="sa9">
<celldesigner:linkAnchor position="N"/>
</celldesigner:baseReactant>
</celldesigner:baseReactants>
<celldesigner:baseProducts>
<celldesigner:baseProduct species="V" alias="sa4">
<celldesigner:linkAnchor position="S"/>
</celldesigner:baseProduct>
</celldesigner:baseProducts>
<celldesigner:connectScheme connectPolicy="direct" rectangleIndex="1">
<celldesigner:listOfLineDirection>
<celldesigner:lineDirection index="0" value="unknown"/>
<celldesigner:lineDirection index="1" value="unknown"/>
<celldesigner:lineDirection index="2" value="unknown"/>
</celldesigner:listOfLineDirection>
</celldesigner:connectScheme>
<celldesigner:editPoints>0.09714285714285698,0.0 0.13142857142857123,0.0</celldesigner:editPoints>
<celldesigner:line width="1.0" color="ff000000"/>
<celldesigner:listOfModification>
<celldesigner:modification type="CATALYSIS" modifiers="Tstarstar" aliases="sa3" targetLineIndex="-1,3">
<celldesigner:connectScheme connectPolicy="direct">
<celldesigner:listOfLineDirection>
<celldesigner:lineDirection index="0" value="unknown"/>
</celldesigner:listOfLineDirection>
</celldesigner:connectScheme>
<celldesigner:linkTarget species="Tstarstar" alias="sa3">
<celldesigner:linkAnchor position="E"/>
</celldesigner:linkTarget>
<celldesigner:line width="1.0" color="ff000000"/>
</celldesigner:modification>
</celldesigner:listOfModification>
</celldesigner:extension>
</annotation>
<listOfReactants>
<speciesReference metaid="CDMT00017" species="s9">
<annotation>
<celldesigner:extension>
<celldesigner:alias>sa9</celldesigner:alias>
</celldesigner:extension>
</annotation>
</speciesReference>
</listOfReactants>
<listOfProducts>
<speciesReference metaid="CDMT00018" species="V">
<annotation>
<celldesigner:extension>
<celldesigner:alias>sa4</celldesigner:alias>
</celldesigner:extension>
</annotation>
</speciesReference>
</listOfProducts>
<listOfModifiers>
<modifierSpeciesReference metaid="CDMT00019" species="Tstarstar">
<annotation>
<celldesigner:extension>
<celldesigner:alias>sa3</celldesigner:alias>
</celldesigner:extension>
</annotation>
</modifierSpeciesReference>
</listOfModifiers>
<kineticLaw metaid="CDMT00020">
<math xmlns="http://www.w3.org/1998/Math/MathML">
<apply>
<times/>
<ci> N </ci>
<ci> mu_b </ci>
<ci> Tstarstar </ci>
</apply>
</math>
<listOfParameters>
<parameter metaid="N" id="N" value="1200" units="substance"/>
<parameter metaid="CDMT00021" id="mu_b" value="0.24" units="substance"/>
</listOfParameters>
</kineticLaw>
</reaction>
<reaction metaid="re10" id="re10" reversible="false" fast="false">
<annotation>
<celldesigner:extension>
<celldesigner:reactionType>HETERODIMER_ASSOCIATION</celldesigner:reactionType>
<celldesigner:baseReactants>
<celldesigner:baseReactant species="T" alias="sa1">
<celldesigner:linkAnchor position="N"/>
</celldesigner:baseReactant>
<celldesigner:baseReactant species="V" alias="sa4">
<celldesigner:linkAnchor position="W"/>
</celldesigner:baseReactant>
</celldesigner:baseReactants>
<celldesigner:baseProducts>
<celldesigner:baseProduct species="Tstar" alias="sa2">
<celldesigner:linkAnchor position="W"/>
</celldesigner:baseProduct>
</celldesigner:baseProducts>
<celldesigner:connectScheme connectPolicy="direct">
<celldesigner:listOfLineDirection>
<celldesigner:lineDirection arm="0" index="0" value="unknown"/>
<celldesigner:lineDirection arm="1" index="0" value="unknown"/>
<celldesigner:lineDirection arm="2" index="0" value="unknown"/>
<celldesigner:lineDirection arm="2" index="1" value="unknown"/>
<celldesigner:lineDirection arm="2" index="2" value="unknown"/>
<celldesigner:lineDirection arm="2" index="3" value="unknown"/>
</celldesigner:listOfLineDirection>
</celldesigner:connectScheme>
<celldesigner:editPoints num0="0" num1="0" num2="3" tShapeIndex="2">-0.06052963430012606,0.5649432534678438 0.9069356872635566,0.6686002522068095 0.9303909205548551,0.6496847414880201 0.05335365853658536,-0.20579268292682928</celldesigner:editPoints>
<celldesigner:line width="1.0" color="ff000000"/>
</celldesigner:extension>
</annotation>
<listOfReactants>
<speciesReference metaid="CDMT00022" species="T">
<annotation>
<celldesigner:extension>
<celldesigner:alias>sa1</celldesigner:alias>
</celldesigner:extension>
</annotation>
</speciesReference>
<speciesReference metaid="CDMT00023" species="V">
<annotation>
<celldesigner:extension>
<celldesigner:alias>sa4</celldesigner:alias>
</celldesigner:extension>
</annotation>
</speciesReference>
</listOfReactants>
<listOfProducts>
<speciesReference metaid="CDMT00024" species="Tstar">
<annotation>
<celldesigner:extension>
<celldesigner:alias>sa2</celldesigner:alias>
</celldesigner:extension>
</annotation>
</speciesReference>
</listOfProducts>
<kineticLaw metaid="CDMT00025">
<math xmlns="http://www.w3.org/1998/Math/MathML">
<apply>
<times/>
<ci> k1 </ci>
<ci> T </ci>
<ci> V </ci>
</apply>
</math>
<listOfParameters>
<parameter metaid="k1" id="k1" value="2.4" units="substance"/>
</listOfParameters>
</kineticLaw>
</reaction>
<reaction metaid="re11" id="re11" reversible="false" fast="false">
<annotation>
<celldesigner:extension>
<celldesigner:reactionType>STATE_TRANSITION</celldesigner:reactionType>
<celldesigner:baseReactants>
<celldesigner:baseReactant species="V" alias="sa4">
<celldesigner:linkAnchor position="E"/>
</celldesigner:baseReactant>
</celldesigner:baseReactants>
<celldesigner:baseProducts>
<celldesigner:baseProduct species="s10" alias="sa10">
<celldesigner:linkAnchor position="W"/>
</celldesigner:baseProduct>
</celldesigner:baseProducts>
<celldesigner:connectScheme connectPolicy="direct" rectangleIndex="1">
<celldesigner:listOfLineDirection>
<celldesigner:lineDirection index="0" value="unknown"/>
<celldesigner:lineDirection index="1" value="unknown"/>
<celldesigner:lineDirection index="2" value="unknown"/>
</celldesigner:listOfLineDirection>
</celldesigner:connectScheme>
<celldesigner:editPoints>0.3428571428571425,0.0 0.5142857142857125,0.0</celldesigner:editPoints>
<celldesigner:line width="1.0" color="ff000000"/>
</celldesigner:extension>
</annotation>
<listOfReactants>
<speciesReference metaid="CDMT00026" species="V">
<annotation>
<celldesigner:extension>
<celldesigner:alias>sa4</celldesigner:alias>
</celldesigner:extension>
</annotation>
</speciesReference>
</listOfReactants>
<listOfProducts>
<speciesReference metaid="CDMT00027" species="s10">
<annotation>
<celldesigner:extension>
<celldesigner:alias>sa10</celldesigner:alias>
</celldesigner:extension>
</annotation>
</speciesReference>
</listOfProducts>
<kineticLaw metaid="CDMT00028">
<math xmlns="http://www.w3.org/1998/Math/MathML">
<apply>
<times/>
<ci> mu_V </ci>
<ci> V </ci>
</apply>
</math>
<listOfParameters>
<parameter metaid="mu_V" id="mu_V" value="5" units="substance"/>
</listOfParameters>
</kineticLaw>
</reaction>
<reaction metaid="re12" id="re12" reversible="false" fast="false">
<annotation>
<celldesigner:extension>
<celldesigner:reactionType>STATE_TRANSITION</celldesigner:reactionType>
<celldesigner:baseReactants>
<celldesigner:baseReactant species="s11" alias="sa11">
<celldesigner:linkAnchor position="S"/>
</celldesigner:baseReactant>
</celldesigner:baseReactants>
<celldesigner:baseProducts>
<celldesigner:baseProduct species="T" alias="sa1">
<celldesigner:linkAnchor position="S"/>
</celldesigner:baseProduct>
</celldesigner:baseProducts>
<celldesigner:connectScheme connectPolicy="direct" rectangleIndex="1">
<celldesigner:listOfLineDirection>
<celldesigner:lineDirection index="0" value="unknown"/>
<celldesigner:lineDirection index="1" value="unknown"/>
<celldesigner:lineDirection index="2" value="unknown"/>
<celldesigner:lineDirection index="3" value="unknown"/>
</celldesigner:listOfLineDirection>
</celldesigner:connectScheme>
<celldesigner:editPoints>-0.030630630630630318,-0.1837837837837839 -0.0036036036036031227,-0.2216216216216218 0.8828828828828832,-0.36936936936936937</celldesigner:editPoints>
<celldesigner:line width="1.0" color="ff000000"/>
<celldesigner:listOfModification>
<celldesigner:modification type="CATALYSIS" modifiers="T" aliases="sa1" targetLineIndex="-1,5" editPoints="0.8927980932890325,-0.6131320879402686 1.199364137259166,-0.16673304129575217">
<celldesigner:connectScheme connectPolicy="direct">
<celldesigner:listOfLineDirection>
<celldesigner:lineDirection index="0" value="unknown"/>
<celldesigner:lineDirection index="1" value="unknown"/>
<celldesigner:lineDirection index="2" value="unknown"/>
</celldesigner:listOfLineDirection>
</celldesigner:connectScheme>
<celldesigner:linkTarget species="T" alias="sa1">
<celldesigner:linkAnchor position="E"/>
</celldesigner:linkTarget>
<celldesigner:line width="1.0" color="ff000000"/>
</celldesigner:modification>
<celldesigner:modification type="CATALYSIS" modifiers="Tstar" aliases="sa2" targetLineIndex="-1,2" editPoints="0.19928412058639244,0.3939696349095736">
<celldesigner:connectScheme connectPolicy="direct">
<celldesigner:listOfLineDirection>
<celldesigner:lineDirection index="0" value="unknown"/>
<celldesigner:lineDirection index="1" value="unknown"/>
</celldesigner:listOfLineDirection>
</celldesigner:connectScheme>
<celldesigner:linkTarget species="Tstar" alias="sa2">
<celldesigner:linkAnchor position="E"/>
</celldesigner:linkTarget>
<celldesigner:line width="1.0" color="ff000000"/>
</celldesigner:modification>
<celldesigner:modification type="CATALYSIS" modifiers="Tstarstar" aliases="sa3" targetLineIndex="-1,4">
<celldesigner:connectScheme connectPolicy="direct">
<celldesigner:listOfLineDirection>
<celldesigner:lineDirection index="0" value="unknown"/>
</celldesigner:listOfLineDirection>
</celldesigner:connectScheme>
<celldesigner:linkTarget species="Tstarstar" alias="sa3">
<celldesigner:linkAnchor position="N"/>
</celldesigner:linkTarget>
<celldesigner:line width="1.0" color="ff000000"/>
</celldesigner:modification>
</celldesigner:listOfModification>
</celldesigner:extension>
</annotation>
<listOfReactants>
<speciesReference metaid="CDMT00029" species="s11">
<annotation>
<celldesigner:extension>
<celldesigner:alias>sa11</celldesigner:alias>
</celldesigner:extension>
</annotation>
</speciesReference>
</listOfReactants>
<listOfProducts>
<speciesReference metaid="CDMT00030" species="T">
<annotation>
<celldesigner:extension>
<celldesigner:alias>sa1</celldesigner:alias>
</celldesigner:extension>
</annotation>
</speciesReference>
</listOfProducts>
<listOfModifiers>
<modifierSpeciesReference metaid="CDMT00031" species="T">
<annotation>
<celldesigner:extension>
<celldesigner:alias>sa1</celldesigner:alias>
</celldesigner:extension>
</annotation>
</modifierSpeciesReference>
<modifierSpeciesReference metaid="CDMT00032" species="Tstar">
<annotation>
<celldesigner:extension>
<celldesigner:alias>sa2</celldesigner:alias>
</celldesigner:extension>
</annotation>
</modifierSpeciesReference>
<modifierSpeciesReference metaid="CDMT00033" species="Tstarstar">
<annotation>
<celldesigner:extension>
<celldesigner:alias>sa3</celldesigner:alias>
</celldesigner:extension>
</annotation>
</modifierSpeciesReference>
</listOfModifiers>
<kineticLaw metaid="CDMT00034">
<math xmlns="http://www.w3.org/1998/Math/MathML">
<apply>
<times/>
<ci> r </ci>
<ci> T </ci>
<apply>
<minus/>
<cn type="integer"> 1 </cn>
<apply>
<divide/>
<apply>
<plus/>
<ci> T </ci>
<ci> Tstar </ci>
<ci> Tstarstar </ci>
</apply>
<ci> Tmax </ci>
</apply>
</apply>
</apply>
</math>
<listOfParameters>
<parameter metaid="r" id="r" value="12" units="substance"/>
<parameter metaid="Tmax" id="Tmax" value="1500" units="substance"/>
</listOfParameters>
</kineticLaw>
</reaction>
</listOfReactions>
</model>
</sbml>
