# Supplementary material
Source: MDPI journal article supplement (https://www.mdpi.com/2227-9717/9/10/1830)
Supplement: s1 [file s1 › S11 Perelson2000Model_ForParameterEstimation.xml]

<?xml version="1.0" encoding="UTF-8"?>
<sbml xmlns="http://www.sbml.org/sbml/level2/version4" xmlns:celldesigner="http://www.sbml.org/2001/ns/celldesigner" level="2" version="4">
<model metaid="Perelson2000Model_ForParameterEstimation" id="Perelson2000Model_ForParameterEstimation">
<annotation>
<celldesigner:extension>
<celldesigner:modelVersion>4.0</celldesigner:modelVersion>
<celldesigner:modelDisplay sizeX="510" sizeY="390"/>
<celldesigner:listOfCompartmentAliases/>
<celldesigner:listOfComplexSpeciesAliases/>
<celldesigner:listOfSpeciesAliases>
<celldesigner:speciesAlias id="sa1" species="V">
<celldesigner:activity>inactive</celldesigner:activity>
<celldesigner:bounds x="115.0" y="196.0" w="80.0" h="40.0"/>
<celldesigner:font size="12"/>
<celldesigner:view state="usual"/>
<celldesigner:usualView>
<celldesigner:innerPosition x="0.0" y="0.0"/>
<celldesigner:boxSize width="80.0" height="40.0"/>
<celldesigner:singleLine width="1.0"/>
<celldesigner:paint color="ffccffcc" scheme="Color"/>
</celldesigner:usualView>
<celldesigner:briefView>
<celldesigner:innerPosition x="0.0" y="0.0"/>
<celldesigner:boxSize width="80.0" height="60.0"/>
<celldesigner:singleLine width="1.0"/>
<celldesigner:paint color="3fff0000" scheme="Color"/>
</celldesigner:briefView>
<celldesigner:info state="empty" angle="-1.5707963267948966"/>
</celldesigner:speciesAlias>
<celldesigner:speciesAlias id="sa2" species="T">
<celldesigner:activity>inactive</celldesigner:activity>
<celldesigner:bounds x="275.0" y="195.0" w="80.0" h="40.0"/>
<celldesigner:font size="12"/>
<celldesigner:view state="usual"/>
<celldesigner:usualView>
<celldesigner:innerPosition x="0.0" y="0.0"/>
<celldesigner:boxSize width="80.0" height="40.0"/>
<celldesigner:singleLine width="1.0"/>
<celldesigner:paint color="ffccffcc" scheme="Color"/>
</celldesigner:usualView>
<celldesigner:briefView>
<celldesigner:innerPosition x="0.0" y="0.0"/>
<celldesigner:boxSize width="80.0" height="60.0"/>
<celldesigner:singleLine width="1.0"/>
<celldesigner:paint color="3fff0000" scheme="Color"/>
</celldesigner:briefView>
<celldesigner:info state="empty" angle="-1.5707963267948966"/>
</celldesigner:speciesAlias>
<celldesigner:speciesAlias id="sa3" species="Tstar">
<celldesigner:activity>inactive</celldesigner:activity>
<celldesigner:bounds x="205.0" y="45.0" w="80.0" h="40.0"/>
<celldesigner:font size="12"/>
<celldesigner:view state="usual"/>
<celldesigner:usualView>
<celldesigner:innerPosition x="0.0" y="0.0"/>
<celldesigner:boxSize width="80.0" height="40.0"/>
<celldesigner:singleLine width="1.0"/>
<celldesigner:paint color="ffccffcc" scheme="Color"/>
</celldesigner:usualView>
<celldesigner:briefView>
<celldesigner:innerPosition x="0.0" y="0.0"/>
<celldesigner:boxSize width="80.0" height="60.0"/>
<celldesigner:singleLine width="1.0"/>
<celldesigner:paint color="3fff0000" scheme="Color"/>
</celldesigner:briefView>
<celldesigner:info state="empty" angle="-1.5707963267948966"/>
</celldesigner:speciesAlias>
<celldesigner:speciesAlias id="sa4" species="s4">
<celldesigner:activity>inactive</celldesigner:activity>
<celldesigner:bounds x="300.0" y="300.0" w="30.0" h="30.0"/>
<celldesigner:font size="12"/>
<celldesigner:view state="usual"/>
<celldesigner:usualView>
<celldesigner:innerPosition x="0.0" y="0.0"/>
<celldesigner:boxSize width="30.0" height="30.0"/>
<celldesigner:singleLine width="1.0"/>
<celldesigner:paint color="ffffcccc" scheme="Color"/>
</celldesigner:usualView>
<celldesigner:briefView>
<celldesigner:innerPosition x="0.0" y="0.0"/>
<celldesigner:boxSize width="80.0" height="60.0"/>
<celldesigner:singleLine width="1.0"/>
<celldesigner:paint color="3fff0000" scheme="Color"/>
</celldesigner:briefView>
<celldesigner:info state="empty" angle="-1.5707963267948966"/>
</celldesigner:speciesAlias>
<celldesigner:speciesAlias id="sa6" species="s6">
<celldesigner:activity>inactive</celldesigner:activity>
<celldesigner:bounds x="70.0" y="50.0" w="30.0" h="30.0"/>
<celldesigner:font size="12"/>
<celldesigner:view state="usual"/>
<celldesigner:usualView>
<celldesigner:innerPosition x="0.0" y="0.0"/>
<celldesigner:boxSize width="30.0" height="30.0"/>
<celldesigner:singleLine width="1.0"/>
<celldesigner:paint color="ffffcccc" scheme="Color"/>
</celldesigner:usualView>
<celldesigner:briefView>
<celldesigner:innerPosition x="0.0" y="0.0"/>
<celldesigner:boxSize width="80.0" height="60.0"/>
<celldesigner:singleLine width="1.0"/>
<celldesigner:paint color="3fff0000" scheme="Color"/>
</celldesigner:briefView>
<celldesigner:info state="empty" angle="-1.5707963267948966"/>
</celldesigner:speciesAlias>
<celldesigner:speciesAlias id="sa8" species="s8">
<celldesigner:activity>inactive</celldesigner:activity>
<celldesigner:bounds x="50.0" y="150.0" w="30.0" h="30.0"/>
<celldesigner:font size="12"/>
<celldesigner:view state="usual"/>
<celldesigner:usualView>
<celldesigner:innerPosition x="0.0" y="0.0"/>
<celldesigner:boxSize width="30.0" height="30.0"/>
<celldesigner:singleLine width="1.0"/>
<celldesigner:paint color="ffffcccc" scheme="Color"/>
</celldesigner:usualView>
<celldesigner:briefView>
<celldesigner:innerPosition x="0.0" y="0.0"/>
<celldesigner:boxSize width="80.0" height="60.0"/>
<celldesigner:singleLine width="1.0"/>
<celldesigner:paint color="3fff0000" scheme="Color"/>
</celldesigner:briefView>
<celldesigner:info state="empty" angle="-1.5707963267948966"/>
</celldesigner:speciesAlias>
<celldesigner:speciesAlias id="sa9" species="s9">
<celldesigner:activity>inactive</celldesigner:activity>
<celldesigner:bounds x="140.0" y="100.0" w="30.0" h="30.0"/>
<celldesigner:font size="12"/>
<celldesigner:view state="usual"/>
<celldesigner:usualView>
<celldesigner:innerPosition x="0.0" y="0.0"/>
<celldesigner:boxSize width="30.0" height="30.0"/>
<celldesigner:singleLine width="1.0"/>
<celldesigner:paint color="ffffcccc" scheme="Color"/>
</celldesigner:usualView>
<celldesigner:briefView>
<celldesigner:innerPosition x="0.0" y="0.0"/>
<celldesigner:boxSize width="80.0" height="60.0"/>
<celldesigner:singleLine width="1.0"/>
<celldesigner:paint color="3fff0000" scheme="Color"/>
</celldesigner:briefView>
<celldesigner:info state="empty" angle="-1.5707963267948966"/>
</celldesigner:speciesAlias>
</celldesigner:listOfSpeciesAliases>
<celldesigner:listOfGroups/>
<celldesigner:listOfProteins>
<celldesigner:protein id="pr1" name="V" type="GENERIC"/>
<celldesigner:protein id="pr2" name="T" type="GENERIC"/>
<celldesigner:protein id="pr3" name="Tstar" type="GENERIC"/>
</celldesigner:listOfProteins>
<celldesigner:listOfGenes/>
<celldesigner:listOfRNAs/>
<celldesigner:listOfAntisenseRNAs/>
<celldesigner:listOfLayers/>
<celldesigner:listOfBlockDiagrams/>
</celldesigner:extension>
</annotation>
<listOfUnitDefinitions>
<unitDefinition metaid="substance" id="substance" name="substance">
<listOfUnits>
<unit metaid="CDMT00021" kind="mole"/>
</listOfUnits>
</unitDefinition>
<unitDefinition metaid="volume" id="volume" name="volume">
<listOfUnits>
<unit metaid="CDMT00022" kind="litre"/>
</listOfUnits>
</unitDefinition>
<unitDefinition metaid="area" id="area" name="area">
<listOfUnits>
<unit metaid="CDMT00023" kind="metre" exponent="2"/>
</listOfUnits>
</unitDefinition>
<unitDefinition metaid="length" id="length" name="length">
<listOfUnits>
<unit metaid="CDMT00024" kind="metre"/>
</listOfUnits>
</unitDefinition>
<unitDefinition metaid="time" id="time" name="time">
<listOfUnits>
<unit metaid="CDMT00025" kind="second"/>
</listOfUnits>
</unitDefinition>
</listOfUnitDefinitions>
<listOfCompartments>
<compartment metaid="default" id="default" size="1" units="volume"/>
</listOfCompartments>
<listOfSpecies>
<species metaid="V" id="V" name="V" compartment="default" initialAmount="0.001" hasOnlySubstanceUnits="true" charge="0">
<annotation>
<celldesigner:extension>
<celldesigner:positionToCompartment>inside</celldesigner:positionToCompartment>
<celldesigner:speciesIdentity>
<celldesigner:class>PROTEIN</celldesigner:class>
<celldesigner:proteinReference>pr1</celldesigner:proteinReference>
</celldesigner:speciesIdentity>
<celldesigner:listOfCatalyzedReactions>
<celldesigner:catalyzed reaction="re5"/>
</celldesigner:listOfCatalyzedReactions>
</celldesigner:extension>
</annotation>
</species>
<species metaid="T" id="T" name="T" compartment="default" initialAmount="8.9" hasOnlySubstanceUnits="true" charge="0">
<annotation>
<celldesigner:extension>
<celldesigner:positionToCompartment>inside</celldesigner:positionToCompartment>
<celldesigner:speciesIdentity>
<celldesigner:class>PROTEIN</celldesigner:class>
<celldesigner:proteinReference>pr2</celldesigner:proteinReference>
</celldesigner:speciesIdentity>
</celldesigner:extension>
</annotation>
</species>
<species metaid="Tstar" id="Tstar" name="Tstar" compartment="default" initialAmount="0">
<annotation>
<celldesigner:extension>
<celldesigner:positionToCompartment>inside</celldesigner:positionToCompartment>
<celldesigner:speciesIdentity>
<celldesigner:class>PROTEIN</celldesigner:class>
<celldesigner:proteinReference>pr3</celldesigner:proteinReference>
</celldesigner:speciesIdentity>
<celldesigner:listOfCatalyzedReactions>
<celldesigner:catalyzed reaction="re8"/>
</celldesigner:listOfCatalyzedReactions>
</celldesigner:extension>
</annotation>
</species>
<species metaid="s4" id="s4" name="s4" compartment="default" initialAmount="0" hasOnlySubstanceUnits="true" boundaryCondition="true" charge="0" constant="true">
<annotation>
<celldesigner:extension>
<celldesigner:positionToCompartment>inside</celldesigner:positionToCompartment>
<celldesigner:speciesIdentity>
<celldesigner:class>DEGRADED</celldesigner:class>
<celldesigner:name>s4</celldesigner:name>
</celldesigner:speciesIdentity>
</celldesigner:extension>
</annotation>
</species>
<species metaid="s6" id="s6" name="s6" compartment="default" initialAmount="0" hasOnlySubstanceUnits="true" boundaryCondition="true" charge="0" constant="true">
<annotation>
<celldesigner:extension>
<celldesigner:positionToCompartment>inside</celldesigner:positionToCompartment>
<celldesigner:speciesIdentity>
<celldesigner:class>DEGRADED</celldesigner:class>
<celldesigner:name>s6</celldesigner:name>
</celldesigner:speciesIdentity>
</celldesigner:extension>
</annotation>
</species>
<species metaid="s8" id="s8" name="s8" compartment="default" initialAmount="0" hasOnlySubstanceUnits="true" boundaryCondition="true" charge="0" constant="true">
<annotation>
<celldesigner:extension>
<celldesigner:positionToCompartment>inside</celldesigner:positionToCompartment>
<celldesigner:speciesIdentity>
<celldesigner:class>DEGRADED</celldesigner:class>
<celldesigner:name>s8</celldesigner:name>
</celldesigner:speciesIdentity>
</celldesigner:extension>
</annotation>
</species>
<species metaid="s9" id="s9" name="s9" compartment="default" initialAmount="0" hasOnlySubstanceUnits="true" boundaryCondition="true" charge="0" constant="true">
<annotation>
<celldesigner:extension>
<celldesigner:positionToCompartment>inside</celldesigner:positionToCompartment>
<celldesigner:speciesIdentity>
<celldesigner:class>DEGRADED</celldesigner:class>
<celldesigner:name>s9</celldesigner:name>
</celldesigner:speciesIdentity>
</celldesigner:extension>
</annotation>
</species>
</listOfSpecies>
<listOfReactions>
<reaction metaid="re1" id="re1" reversible="false" fast="false">
<annotation>
<celldesigner:extension>
<celldesigner:reactionType>STATE_TRANSITION</celldesigner:reactionType>
<celldesigner:baseReactants>
<celldesigner:baseReactant species="s4" alias="sa4">
<celldesigner:linkAnchor position="N"/>
</celldesigner:baseReactant>
</celldesigner:baseReactants>
<celldesigner:baseProducts>
<celldesigner:baseProduct species="T" alias="sa2">
<celldesigner:linkAnchor position="S"/>
</celldesigner:baseProduct>
</celldesigner:baseProducts>
<celldesigner:connectScheme connectPolicy="direct" rectangleIndex="1">
<celldesigner:listOfLineDirection>
<celldesigner:lineDirection index="0" value="unknown"/>
<celldesigner:lineDirection index="1" value="unknown"/>
<celldesigner:lineDirection index="2" value="unknown"/>
</celldesigner:listOfLineDirection>
</celldesigner:connectScheme>
<celldesigner:editPoints>0.49999999999999956,0.0 0.6714285714285713,0.0</celldesigner:editPoints>
<celldesigner:line width="1.0" color="ff000000"/>
</celldesigner:extension>
</annotation>
<listOfReactants>
<speciesReference metaid="CDMT00001" species="s4">
<annotation>
<celldesigner:extension>
<celldesigner:alias>sa4</celldesigner:alias>
</celldesigner:extension>
</annotation>
</speciesReference>
</listOfReactants>
<listOfProducts>
<speciesReference metaid="CDMT00002" species="T">
<annotation>
<celldesigner:extension>
<celldesigner:alias>sa2</celldesigner:alias>
</celldesigner:extension>
</annotation>
</speciesReference>
</listOfProducts>
<kineticLaw metaid="CDMT00003">
<annotation/>
<math xmlns="http://www.w3.org/1998/Math/MathML">
<apply>
<minus/>
<apply>
<times/>
<ci> d </ci>
<cn> 8.9 </cn>
</apply>
<apply>
<times/>
<ci> d </ci>
<ci> T </ci>
</apply>
</apply>
</math>
<listOfParameters>
<parameter metaid="d" id="d" value="0.01" units="substance"/>
</listOfParameters>
</kineticLaw>
</reaction>
<reaction metaid="re5" id="re5" reversible="false" fast="false">
<annotation>
<celldesigner:extension>
<celldesigner:reactionType>STATE_TRANSITION</celldesigner:reactionType>
<celldesigner:baseReactants>
<celldesigner:baseReactant species="T" alias="sa2">
<celldesigner:linkAnchor position="W"/>
</celldesigner:baseReactant>
</celldesigner:baseReactants>
<celldesigner:baseProducts>
<celldesigner:baseProduct species="Tstar" alias="sa3">
<celldesigner:linkAnchor position="S"/>
</celldesigner:baseProduct>
</celldesigner:baseProducts>
<celldesigner:connectScheme connectPolicy="direct" rectangleIndex="1">
<celldesigner:listOfLineDirection>
<celldesigner:lineDirection index="0" value="unknown"/>
<celldesigner:lineDirection index="1" value="unknown"/>
<celldesigner:lineDirection index="2" value="unknown"/>
</celldesigner:listOfLineDirection>
</celldesigner:connectScheme>
<celldesigner:editPoints>0.04044943820224711,-0.17528089887640386 0.09438202247191008,-0.20898876404494393</celldesigner:editPoints>
<celldesigner:line width="1.0" color="ff000000"/>
<celldesigner:listOfModification>
<celldesigner:modification type="CATALYSIS" modifiers="V" aliases="sa1" targetLineIndex="-1,3">
<celldesigner:connectScheme connectPolicy="direct">
<celldesigner:listOfLineDirection>
<celldesigner:lineDirection index="0" value="unknown"/>
</celldesigner:listOfLineDirection>
</celldesigner:connectScheme>
<celldesigner:linkTarget species="V" alias="sa1">
<celldesigner:linkAnchor position="E"/>
</celldesigner:linkTarget>
<celldesigner:line width="1.0" color="ff000000"/>
</celldesigner:modification>
</celldesigner:listOfModification>
</celldesigner:extension>
</annotation>
<listOfReactants>
<speciesReference metaid="CDMT00007" species="T">
<annotation>
<celldesigner:extension>
<celldesigner:alias>sa2</celldesigner:alias>
</celldesigner:extension>
</annotation>
</speciesReference>
</listOfReactants>
<listOfProducts>
<speciesReference metaid="CDMT00008" species="Tstar">
<annotation>
<celldesigner:extension>
<celldesigner:alias>sa3</celldesigner:alias>
</celldesigner:extension>
</annotation>
</speciesReference>
</listOfProducts>
<listOfModifiers>
<modifierSpeciesReference metaid="CDMT00009" species="V">
<annotation>
<celldesigner:extension>
<celldesigner:alias>sa1</celldesigner:alias>
</celldesigner:extension>
</annotation>
</modifierSpeciesReference>
</listOfModifiers>
<kineticLaw metaid="CDMT00010">
<annotation>
<celldesigner:extension>
<celldesigner:selectedFunction>NonPredefinedFunction</celldesigner:selectedFunction>
</celldesigner:extension>
</annotation>
<math xmlns="http://www.w3.org/1998/Math/MathML">
<apply>
<times/>
<ci> k </ci>
<ci> T </ci>
<ci> V </ci>
</apply>
</math>
<listOfParameters>
<parameter metaid="k" id="k" value="0.65" units="substance"/>
</listOfParameters>
</kineticLaw>
</reaction>
<reaction metaid="re6" id="re6" reversible="false" fast="false">
<annotation>
<celldesigner:extension>
<celldesigner:reactionType>STATE_TRANSITION</celldesigner:reactionType>
<celldesigner:baseReactants>
<celldesigner:baseReactant species="Tstar" alias="sa3">
<celldesigner:linkAnchor position="W"/>
</celldesigner:baseReactant>
</celldesigner:baseReactants>
<celldesigner:baseProducts>
<celldesigner:baseProduct species="s6" alias="sa6">
<celldesigner:linkAnchor position="E"/>
</celldesigner:baseProduct>
</celldesigner:baseProducts>
<celldesigner:connectScheme connectPolicy="direct" rectangleIndex="1">
<celldesigner:listOfLineDirection>
<celldesigner:lineDirection index="0" value="unknown"/>
<celldesigner:lineDirection index="1" value="unknown"/>
<celldesigner:lineDirection index="2" value="unknown"/>
</celldesigner:listOfLineDirection>
</celldesigner:connectScheme>
<celldesigner:editPoints>0.5818181818181818,1.1102230246251565E-16 0.6909090909090909,1.1102230246251565E-16</celldesigner:editPoints>
<celldesigner:line width="1.0" color="ff000000"/>
</celldesigner:extension>
</annotation>
<listOfReactants>
<speciesReference metaid="CDMT00011" species="Tstar">
<annotation>
<celldesigner:extension>
<celldesigner:alias>sa3</celldesigner:alias>
</celldesigner:extension>
</annotation>
</speciesReference>
</listOfReactants>
<listOfProducts>
<speciesReference metaid="CDMT00012" species="s6">
<annotation>
<celldesigner:extension>
<celldesigner:alias>sa6</celldesigner:alias>
</celldesigner:extension>
</annotation>
</speciesReference>
</listOfProducts>
<kineticLaw metaid="CDMT00013">
<math xmlns="http://www.w3.org/1998/Math/MathML">
<apply>
<times/>
<ci> delta </ci>
<ci> Tstar </ci>
</apply>
</math>
<listOfParameters>
<parameter metaid="delta" id="delta" value="0.39" units="substance"/>
</listOfParameters>
</kineticLaw>
</reaction>
<reaction metaid="re8" id="re8" reversible="false" fast="false">
<annotation>
<celldesigner:extension>
<celldesigner:reactionType>STATE_TRANSITION</celldesigner:reactionType>
<celldesigner:baseReactants>
<celldesigner:baseReactant species="s8" alias="sa8">
<celldesigner:linkAnchor position="S"/>
</celldesigner:baseReactant>
</celldesigner:baseReactants>
<celldesigner:baseProducts>
<celldesigner:baseProduct species="V" alias="sa1">
<celldesigner:linkAnchor position="W"/>
</celldesigner:baseProduct>
</celldesigner:baseProducts>
<celldesigner:connectScheme connectPolicy="direct" rectangleIndex="1">
<celldesigner:listOfLineDirection>
<celldesigner:lineDirection index="0" value="unknown"/>
<celldesigner:lineDirection index="1" value="unknown"/>
<celldesigner:lineDirection index="2" value="unknown"/>
</celldesigner:listOfLineDirection>
</celldesigner:connectScheme>
<celldesigner:editPoints>0.3334130590767739,0.40660129155704405 0.46400382683568475,0.4195168619947385</celldesigner:editPoints>
<celldesigner:line width="1.0" color="ff000000"/>
<celldesigner:listOfModification>
<celldesigner:modification type="CATALYSIS" modifiers="Tstar" aliases="sa3" targetLineIndex="-1,3" editPoints="-0.05529878888734108,0.058541309364605 0.5886556141233185,0.6668279871253542 1.1139941085530567,0.11068554816160292">
<celldesigner:connectScheme connectPolicy="direct">
<celldesigner:listOfLineDirection>
<celldesigner:lineDirection index="0" value="unknown"/>
<celldesigner:lineDirection index="1" value="unknown"/>
<celldesigner:lineDirection index="2" value="unknown"/>
<celldesigner:lineDirection index="3" value="unknown"/>
</celldesigner:listOfLineDirection>
</celldesigner:connectScheme>
<celldesigner:linkTarget species="Tstar" alias="sa3">
<celldesigner:linkAnchor position="N"/>
</celldesigner:linkTarget>
<celldesigner:line width="1.0" color="ff000000"/>
</celldesigner:modification>
</celldesigner:listOfModification>
</celldesigner:extension>
</annotation>
<listOfReactants>
<speciesReference metaid="CDMT00014" species="s8">
<annotation>
<celldesigner:extension>
<celldesigner:alias>sa8</celldesigner:alias>
</celldesigner:extension>
</annotation>
</speciesReference>
</listOfReactants>
<listOfProducts>
<speciesReference metaid="CDMT00015" species="V">
<annotation>
<celldesigner:extension>
<celldesigner:alias>sa1</celldesigner:alias>
</celldesigner:extension>
</annotation>
</speciesReference>
</listOfProducts>
<listOfModifiers>
<modifierSpeciesReference metaid="CDMT00016" species="Tstar">
<annotation>
<celldesigner:extension>
<celldesigner:alias>sa3</celldesigner:alias>
</celldesigner:extension>
</annotation>
</modifierSpeciesReference>
</listOfModifiers>
<kineticLaw metaid="CDMT00017">
<annotation>
<celldesigner:extension>
<celldesigner:selectedFunction>NonPredefinedFunction</celldesigner:selectedFunction>
</celldesigner:extension>
</annotation>
<math xmlns="http://www.w3.org/1998/Math/MathML">
<apply>
<times/>
<ci> piVal </ci>
<ci> Tstar </ci>
</apply>
</math>
<listOfParameters>
<parameter metaid="piVal" id="piVal" value="850" units="substance"/>
</listOfParameters>
</kineticLaw>
</reaction>
<reaction metaid="re9" id="re9" reversible="false" fast="false">
<annotation>
<celldesigner:extension>
<celldesigner:reactionType>STATE_TRANSITION</celldesigner:reactionType>
<celldesigner:baseReactants>
<celldesigner:baseReactant species="V" alias="sa1">
<celldesigner:linkAnchor position="N"/>
</celldesigner:baseReactant>
</celldesigner:baseReactants>
<celldesigner:baseProducts>
<celldesigner:baseProduct species="s9" alias="sa9">
<celldesigner:linkAnchor position="S"/>
</celldesigner:baseProduct>
</celldesigner:baseProducts>
<celldesigner:connectScheme connectPolicy="direct" rectangleIndex="1">
<celldesigner:listOfLineDirection>
<celldesigner:lineDirection index="0" value="unknown"/>
<celldesigner:lineDirection index="1" value="unknown"/>
<celldesigner:lineDirection index="2" value="unknown"/>
</celldesigner:listOfLineDirection>
</celldesigner:connectScheme>
<celldesigner:editPoints>0.352112676056338,0.0 0.52112676056338,0.0</celldesigner:editPoints>
<celldesigner:line width="1.0" color="ff000000"/>
</celldesigner:extension>
</annotation>
<listOfReactants>
<speciesReference metaid="CDMT00018" species="V">
<annotation>
<celldesigner:extension>
<celldesigner:alias>sa1</celldesigner:alias>
</celldesigner:extension>
</annotation>
</speciesReference>
</listOfReactants>
<listOfProducts>
<speciesReference metaid="CDMT00019" species="s9">
<annotation>
<celldesigner:extension>
<celldesigner:alias>sa9</celldesigner:alias>
</celldesigner:extension>
</annotation>
</speciesReference>
</listOfProducts>
<kineticLaw metaid="CDMT00020">
<math xmlns="http://www.w3.org/1998/Math/MathML">
<apply>
<times/>
<cn type="integer"> 3 </cn>
<ci> V </ci>
</apply>
</math>
</kineticLaw>
</reaction>
</listOfReactions>
</model>
</sbml>
